# Supplementary material for: Gene Expression Profile of the A549 Human Non-Small Cell Lung Carcinoma Cell Line following Treatment with the Seeds ofDescurainia sophia, a Potential Anticancer Drug
Source: Hindawi journal article supplement (doi:10.1155/2013/584604), 2013-01-01

**Gene expression profile of the A549 human non-small cell lung carcinoma cell line following treatment with the seeds of *Descurainia sophia*, a potential anticancer drug**

**Bu-Yeo Kim, Jun Lee, Sung Joon Park, Ok-Sun Bang, and No Soo Kim**

**Supplementary Data**

**Figure Legends**

**Supplementary Figure 1.** Electropherogram of total RNA samples used for gene expression profiles. The A549 cells were treated with increasing concentrations of EEDS (0-20  $\mu\text{g/mL}$ ). After 24 h drug treatment, total RNAs were extracted from the cells, and their integrities were determined by electropherogram. RIN values range from 10 (intact) to 1 (totally degraded).

**Supplementary Figure 2.** Pathways enriched ( $\text{FDR} < 0.01$ ) in the Up- and Down-patterns. The genes that are shown in Table 5 and Figure 4, and involved in each pathway are highlighted in green

**Supplementary Figure 3.** The level of similarity is represented in red with a scale bar. The color in the box of a diagonal line or “Activity” on the right panel represents the activity of the pathway. The positions and names of signaling-related pathways are colored red and the metabolism-related pathways are colored blue.

**Supplementary Table 1.** Quality control of total RNA samples used for gene expression analysis.

| <b>EEDS (<math>\mu\text{g/mL}</math>)</b> | <b>OD<sub>260/280</sub></b> | <b>OD<sub>260/230</sub></b> | <b>Ratio (28s/18s)</b> | <b>RIN<sup>*</sup></b> | <b>Result</b> |
|-------------------------------------------|-----------------------------|-----------------------------|------------------------|------------------------|---------------|
| 0                                         | 2.04                        | 2.22                        | 2.3                    | 9.8                    | Pass          |
| 1.25                                      | 2.03                        | 2.28                        | 2.2                    | 10.0                   | Pass          |
| 5                                         | 2.03                        | 2.28                        | 2.1                    | 10.0                   | Pass          |
| 20                                        | 2.04                        | 2.23                        | 2.0                    | 10.0                   | Pass          |

<sup>\*</sup>RIN values, 10 (intact) to 1 (completely degraded).

**Supplementary Table 2. Full list of genes regulated by EEDS.**

Fold induction represents log2 expression ratio of gene compared with that of control.

|             |             |   |    | EEDS (μg/mL)  |          |        |        |         |
|-------------|-------------|---|----|---------------|----------|--------|--------|---------|
|             | 1.25        | 5 | 20 | symbol        | 1.25     | 5      | 20     | Pattern |
| <div></div> |             |   |    | CAPS2         | 1.58     | -0.076 | -1.03  |         |
|             |             |   |    | GOLIM4        | 1.033    | -0.117 | -0.853 |         |
|             |             |   |    | DKFZp667F0711 | 1.172    | -0.06  | -0.983 |         |
|             |             |   |    | AGTR1         | 1.422    | -0.095 | -1.096 |         |
|             |             |   |    | RORC          | 1.294    | -0.626 | -0.624 |         |
|             |             |   |    | LOC644587     | 1.082    | 0.205  | -0.469 |         |
|             |             |   |    | ITIH4         | 1.064    | 0.147  | -0.312 |         |
|             |             |   |    | IL11RA        | 1.007    | 0.055  | -0.111 |         |
|             |             |   |    | C2orf73       | 1.236    | 0.129  | -0.234 |         |
|             |             |   |    | C3orf42       | 1.14     | 0.2    | -0.157 |         |
|             |             |   |    | TMF1          | 1.028    | 0.118  | -0.125 |         |
|             |             |   |    | SYT6          | 1.384    | 0.181  | -0.126 |         |
|             |             |   |    | SPRR4         | 1.47     | 0.445  | -0.159 |         |
|             |             |   |    | ITGA10        | 2.656    | 0.935  | -0.327 |         |
|             |             |   |    | OR1N2         | 1.909    | -0.365 | -0.488 |         |
|             |             |   |    | CYP3A5        | 1.171    | -0.192 | -0.269 |         |
|             |             |   |    | SLC25A35      | 1.006    | -0.256 | -0.303 |         |
|             |             |   |    | RAB17         | 1.087    | -0.236 | -0.317 |         |
|             |             |   |    | LEFTY1        | 1.854    | -0.505 | -0.298 |         |
|             | <div></div> |   |    |               | HEATR7B1 | 1.386  | -0.402 | -0.331  |
|             |             |   |    | LOC400756     | 1.302    | -0.198 | -0.552 |         |
|             |             |   |    | FAM167B       | 1.409    | -0.185 | -0.568 |         |
|             |             |   |    | STAC3         | 1.285    | -0.212 | -0.485 |         |
|             |             |   |    | KNG1          | 1.067    | -0.314 | -0.418 |         |
|             |             |   |    | IFITM1        | 1.473    | -0.393 | -0.58  |         |
|             |             |   |    | C2orf48       | 1.565    | 0.021  | -0.352 |         |
|             |             |   |    | NOSTRIN       | 1.518    | -0.026 | -0.541 |         |
|             |             |   |    | LOC100129311  | 1.545    | 0.002  | -0.564 |         |
|             |             |   |    | HRCT1         | 1.577    | -0.153 | -0.457 |         |
|             |             |   |    | LOC727838     | 1.297    | -0.101 | 0.058  |         |
|             |             |   |    | BEX4          | 1.65     | -0.148 | -0.004 |         |
|             |             |   |    | TRIM42        | 1.498    | -0.007 | -0.025 |         |
|             |             |   |    | CYP4F3        | 1.304    | -0.023 | -0.032 |         |
|             |             |   |    | LOC100132483  | 1.292    | -0.044 | -0.004 |         |
|             |             |   |    | TMEM190       | 1.211    | -0.022 | 0.078  |         |
|             |             |   |    | LOC646139     | 2.5      | -0.011 | 0.099  |         |
|             |             |   |    | PHYHIPL       | 1.449    | -0.219 | -0.197 |         |
|             |             |   |    | TPPP2         | 2.148    | -0.172 | -0.432 |         |
| <div></div> |             |   |    |               | STK38L   | 1.231  | -0.079 | -0.146  |
|             |             |   |    | LCT           | 1.055    | -0.217 | -0.057 |         |
|             |             |   |    | CSMD1         | 1.229    | -0.262 | -0.084 |         |
|             |             |   |    | GLRA1         | 1.03     | -0.632 | -0.005 |         |
|             |             |   |    | C3orf66       | 1.765    | -0.6   | 0.153  |         |
|             |             |   |    | ST8SLA2       | 0.996    | -1.226 | 0.241  |         |
|             |             |   |    | PEG10         | 1.587    | -1.379 | 0.219  |         |
|             |             |   |    | TPPP3         | 1.569    | -0.534 | 0.571  |         |
|             |             |   |    | SYT5          | 1.383    | -0.5   | 0.428  |         |
|             |             |   |    | C4orf51       | 1.213    | -0.352 | 0.569  |         |
|             |             |   |    | GLS           | 1.177    | 0.033  | 0.771  |         |
|             |             |   |    | FRMD4B        | 1.778    | 0.057  | 1.133  |         |
|             |             |   |    | FLJ42392      | 1.18     | 0.037  | 0.572  |         |
|             |             |   |    | FGFBP1        | 1.84     | 0.082  | 0.997  |         |
|             |             |   |    | WFDC11        | 1.1      | -0.055 | 0.438  |         |
|             |             |   |    | PAK7          | 1.206    | -0.169 | 0.533  |         |
|             |             |   |    | FAM18A        | 1.007    | -0.123 | 0.503  |         |
|             |             |   |    | ACHE          | 2.703    | -0.098 | 0.437  |         |
|             |             |   |    | SERPINA12     | 1.264    | -0.114 | 0.268  |         |
|             |             |   |    | SORCS1        | 1.395    | -0.058 | 0.291  |         |
| <div></div> |             |   |    | SLITRK1       | 1.044    | -0.06  | 0.229  |         |
|             |             |   |    | RIPPLY1       | 1.657    | 0.038  | 0.512  |         |
|             |             |   |    | FLJ39639      | 1.094    | -0.009 | 0.337  |         |
|             |             |   |    | VENTXP7       | 1.242    | 0.293  | 0.342  |         |
|             |             |   |    | DUSP7         | 2.134    | 0.407  | 0.56   |         |
|             |             |   |    | LOC100128164  | 1.62     | 0.224  | 0.485  |         |
|             |             |   |    | LOC339192     | 1.515    | 0.259  | 0.22   |         |
|             |             |   |    | GVIN1         | 1.052    | 0.134  | 0.209  |         |
|             |             |   |    | ACRC          | 1.799    | 0.268  | 0.327  |         |
|             |             |   |    | CTSG          | 1.212    | 0.202  | 0.268  |         |
|             |             |   |    | CLDND2        | 1.594    | 0.291  | 0.298  |         |
|             |             |   |    | OAF           | 1.289    | 0.37   | 0.146  |         |
|             |             |   |    | TRIM5         | 1.037    | 0.268  | 0.086  |         |
|             |             |   |    | LOC100129559  | 1.768    | 0.449  | 0.17   |         |
|             |             |   |    | RESP18        | 1.695    | 0.485  | 0.136  |         |
|             |             |   |    | LOC154761     | 1.721    | 0.47   | 0.153  |         |
|             |             |   |    | LOC399715     | 1.004    | 0.2    | 0      |         |
|             |             |   |    | DEFB127       | 1.344    | 0.307  | 0.034  |         |
|             |             |   |    | SLC2A13       | 1.246    | 0.23   | 0.091  |         |
|             |             |   |    | LOC100130778  | 1.598    | 0.378  | 0.692  |         |
| <div></div> |             |   |    | C11orf9       | 1.092    | 0.298  | 0.457  |         |
|             |             |   |    | SMR3B         | 1.051    | 0.221  | 0.37   |         |
|             |             |   |    | RNASE3        | 1.055    | 0.172  | 0.534  |         |

|               |       |       |        |
|---------------|-------|-------|--------|
| LOC100129081  | 1.022 | 0.194 | 0.533  |
| COL5A2        | 1.028 | 0.424 | 0.297  |
| MAP9          | 1.167 | 0.543 | 0.357  |
| ASPM          | 1.02  | 0.445 | 0.35   |
| FIGF          | 1.874 | 0.687 | 0.381  |
| CYP3A7        | 1.288 | 0.458 | 0.306  |
| LOC100132111  | 1.177 | 0.392 | 0.312  |
| FLJ44342      | 1.068 | 0.383 | 0.311  |
| LOC441294     | 1.726 | 0.568 | 0.582  |
| OR5I1         | 1.159 | 0.48  | 0.451  |
| ENTPD1        | 1.949 | 0.723 | 0.75   |
| CEP152        | 1.314 | 0.436 | 0.537  |
| COPG2IT1      | 1.251 | 0.587 | -0.054 |
| CECR4         | 1.933 | 0.974 | -0.026 |
| MCTS1         | 1.108 | 0.566 | 0.006  |
| C1orf213      | 1.277 | 0.637 | 0.011  |
| DKFZp434J0226 | 1.297 | 0.619 | 0.056  |
| TNFSF15       | 1.852 | 0.716 | 0.09   |
| TMEM133       | 1.195 | 0.44  | 0.005  |
| C8orf4        | 1.044 | 0.687 | 0.191  |
| LOC645722     | 1.212 | 0.858 | 0.168  |
| KRTCAP3       | 1.152 | 0.778 | 0.142  |
| LOC729570     | 1.419 | 0.876 | 0.066  |
| CEP290        | 2.084 | 1.273 | 0.075  |
| ZNF783        | 1.055 | 0.506 | 0.199  |
| PPP1R1B       | 1.216 | 0.55  | 0.241  |
| LOC728175     | 1.048 | 0.476 | 0.163  |
| HEMGN         | 1.942 | 0.908 | 0.267  |
| DSCAML1       | 1.066 | 0.533 | 0.162  |
| GSDMB         | 1.521 | 0.858 | 0.251  |
| EDEM3         | 1.468 | 0.845 | 0.273  |
| EP400NL       | 1.164 | 0.515 | 0.574  |
| CCL26         | 1.15  | 0.524 | 0.549  |
| PAQR6         | 1.419 | 0.622 | 0.742  |
| C13orf18      | 1.092 | 0.448 | 0.575  |
| ARHGAP20      | 1.082 | 0.55  | 0.613  |
| HS3ST6        | 1.367 | 0.703 | 0.565  |
| FCGR2C        | 1.082 | 0.508 | 0.432  |
| CR1           | 1.528 | 0.793 | 0.735  |
| SMC6          | 1.383 | 0.799 | 0.733  |
| PCYT1B        | 1.242 | 0.743 | 0.676  |
| LOC100130387  | 2.04  | 1.213 | 1.118  |
| FLJ45983      | 1.416 | 0.808 | 0.797  |
| SPAM1         | 1.543 | 0.99  | 0.85   |
| CCDC146       | 1.229 | 0.788 | 0.651  |
| CPEB4         | 1.129 | 0.759 | 0.606  |
| LOC389493     | 1.098 | 0.709 | 0.53   |
| FAM174A       | 1.207 | 0.734 | 0.574  |
| FBLN2         | 1.037 | 0.721 | 0.61   |
| SEMA3A        | 1.37  | 0.918 | 0.811  |
| KIAA1109      | 1.154 | 0.772 | 0.692  |
| FYB           | 1.878 | 1.28  | 1.177  |
| C16orf79      | 1.96  | 1.415 | 1.201  |
| RBM44         | 1.453 | 0.869 | 0.963  |
| LOC729078     | 1.008 | 0.607 | 0.63   |
| LOC285000     | 1.083 | 0.647 | 0.684  |
| CENPJ         | 1.078 | 0.657 | 0.682  |
| ANKRD13C      | 1.071 | 0.71  | 0.707  |
| GOLGA2LY1     | 1.469 | 0.623 | 1.017  |
| CMTM2         | 1.091 | 0.466 | 0.732  |
| LOC730045     | 1.11  | 0.508 | 0.765  |
| LGI4          | 1.69  | 0.84  | 1.168  |
| GPC6          | 1.108 | 0.549 | 0.737  |
| PTGS2         | 1.257 | 0.635 | 0.921  |
| WDR72         | 1.123 | 0.786 | 0.542  |
| LARP7         | 1.039 | 0.713 | 0.498  |
| CYP27C1       | 1.207 | 0.913 | 0.582  |
| FOXC1         | 1.097 | 0.701 | 0.397  |
| EPM2AIP1      | 1.111 | 0.72  | 0.396  |
| SEC31B        | 2.224 | 1.431 | 0.938  |
| AHSA2         | 2.09  | 1.294 | 0.897  |
| JMJD7-PLA2G4B | 1.268 | 0.855 | 0.521  |
| LOC100130128  | 1.126 | 0.799 | 0.45   |
| AADAC         | 1.263 | 0.945 | 0.513  |
| SLC4A7        | 1.066 | 0.835 | 0.409  |
| AQP7P3        | 1.576 | 1.035 | 0.516  |
| SLCO4A1       | 1.213 | 0.781 | 0.362  |
| GABRE         | 2.198 | 1.387 | 0.644  |
| PP14571       | 1.772 | 1.173 | 0.483  |
| LEPR          | 1.272 | 0.731 | 0.35   |
| DYNLT3        | 1.016 | 0.723 | 0.31   |
| NTS           | 1.202 | 0.946 | 0.398  |
| CCDC88A       | 1.152 | 0.879 | 0.323  |
| MGAT4A        | 1.441 | 1.346 | 0.369  |
| LOC401097     | 1.447 | 1.259 | 0.381  |
| ANKRA2        | 1.441 | 1.27  | 0.441  |
| TTC32         | 1.632 | 1.554 | 0.621  |
| KCNJ11        | 1.492 | 1.444 | 0.528  |

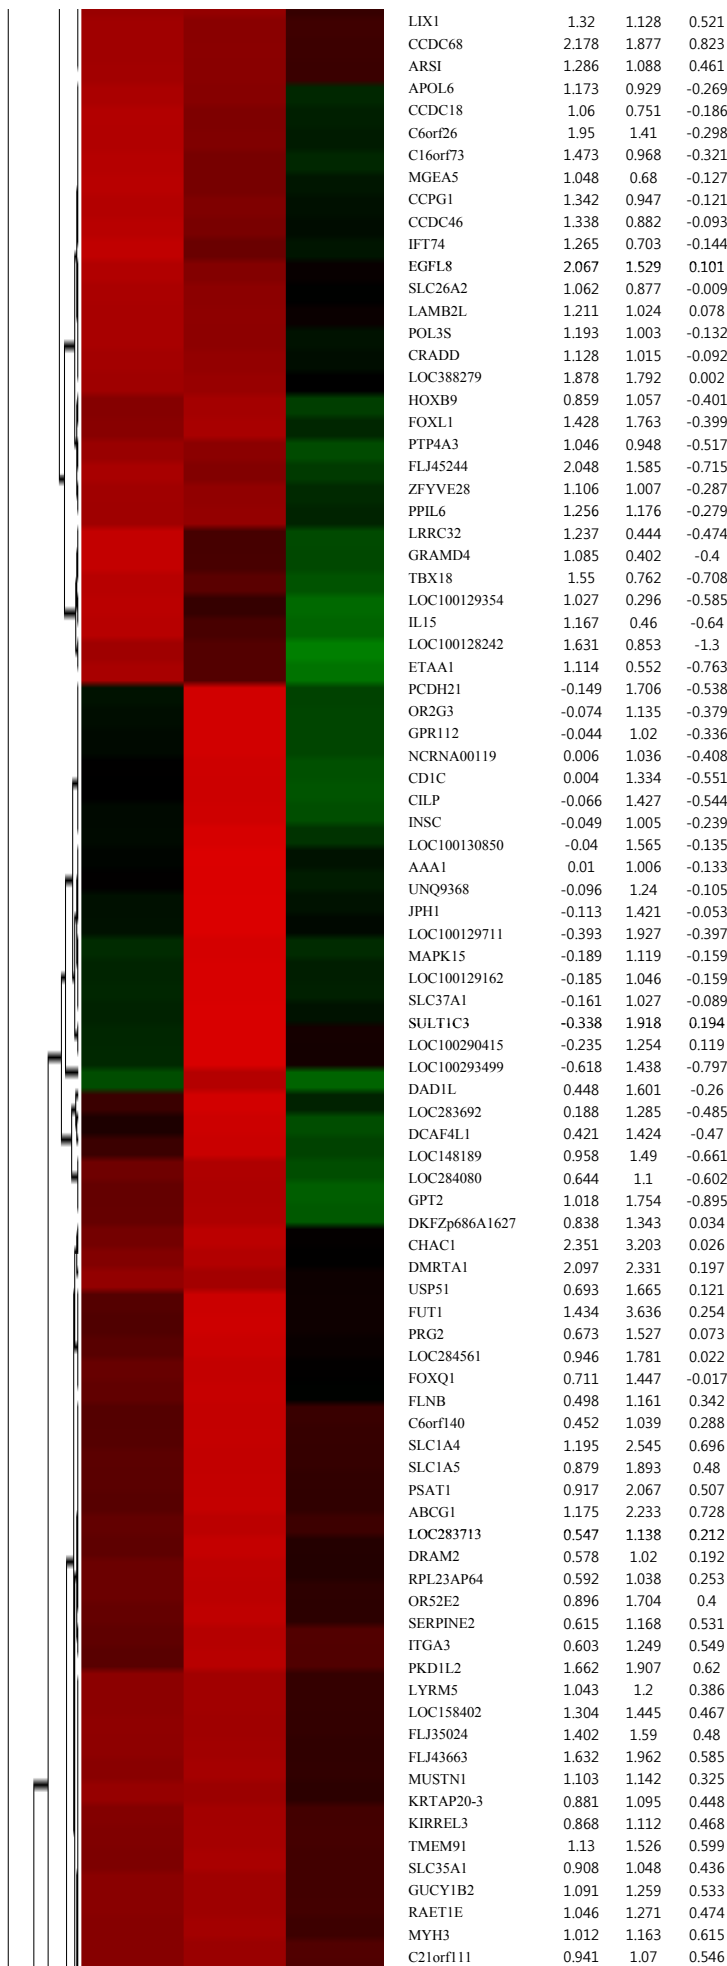

|  |               |        |       |        |
|--|---------------|--------|-------|--------|
|  | hCG_2045830   | 1.283  | 1.557 | 0.783  |
|  | C5orf28       | 0.845  | 1.004 | 0.494  |
|  | LOC728510     | 0.853  | 1.041 | 0.479  |
|  | SIP1          | 0.998  | 1.028 | 0.482  |
|  | NEDD4         | 1.066  | 1.115 | 0.491  |
|  | APIAR         | 1.281  | 1.209 | 0.604  |
|  | ADRBK2        | 0.946  | 1.233 | 0.206  |
|  | LOC283501     | 0.992  | 1.35  | 0.277  |
|  | C20orf70      | 0.821  | 1.099 | 0.212  |
|  | HPVC1         | 0.751  | 1     | 0.231  |
|  | MID1IP1       | 0.869  | 1.111 | 0.227  |
|  | LOC100128086  | 1.039  | 1.239 | 0.248  |
|  | CEBPG         | 0.85   | 1.311 | 0.266  |
|  | C9orf167      | 0.827  | 1.16  | 0.335  |
|  | C8ORFK29      | 1.039  | 1.475 | 0.454  |
|  | CLN8          | 1.309  | 1.791 | 0.493  |
|  | ARL6IP6       | 0.872  | 1.144 | 0.299  |
|  | TRIB3         | 1.246  | 1.91  | 0.594  |
|  | TPBG          | 0.719  | 1.081 | 0.342  |
|  | LRP11         | 0.635  | 1.054 | 0.316  |
|  | LOC57399      | 0.859  | 1.333 | 0.506  |
|  | ITGA2         | 1.566  | 2.309 | 0.877  |
|  | LOC644662     | 0.463  | 1.694 | 1.011  |
|  | ABCC3         | 0.274  | 1.108 | 0.712  |
|  | FBXO17        | 0.261  | 1.049 | 0.549  |
|  | BCAT1         | 0.574  | 2.123 | 1.175  |
|  | SFT2D1        | 0.193  | 1.124 | 0.786  |
|  | PIGL          | 0.195  | 1.005 | 0.682  |
|  | PTH           | 0.249  | 1.247 | 0.792  |
|  | ATP2A3        | 0.217  | 1.412 | 0.899  |
|  | SLC43A1       | 0.288  | 1.498 | 0.875  |
|  | ZMAT3         | 0.573  | 1.427 | 0.79   |
|  | HYI           | 0.523  | 1.247 | 0.702  |
|  | MAF           | 1.259  | 2.881 | 1.677  |
|  | BMPER         | 0.621  | 1.45  | 0.856  |
|  | UHRF1BP1      | 0.608  | 1.305 | 0.755  |
|  | EXPH5         | 0.542  | 1.141 | 0.697  |
|  | MT2A          | 0.499  | 1.097 | 0.54   |
|  | XYLT1         | 0.56   | 1.192 | 0.641  |
|  | STC2          | 1.942  | 4.175 | 2.263  |
|  | WNT16         | 0.537  | 1.526 | 0.732  |
|  | C19orf71      | 0.515  | 1.472 | 0.735  |
|  | LOC285216     | 0.497  | 1.241 | 0.64   |
|  | TLR4          | 0.416  | 1.124 | 0.657  |
|  | ANAPC13       | 0.449  | 1.221 | 0.698  |
|  | FLJ43315      | 1.119  | 3.208 | 1.847  |
|  | IL18BP        | 0.444  | 1.342 | 0.727  |
|  | CDS1          | 0.342  | 1.078 | 0.59   |
|  | GALC          | 0.363  | 1.038 | 0.696  |
|  | KRTAP23-1     | 0.38   | 1.015 | 0.724  |
|  | ASNS          | 1.26   | 3.401 | 2.546  |
|  | LOC100131397  | 0.428  | 1.058 | 0.754  |
|  | C12orf39      | 1.497  | 3.796 | 2.58   |
|  | KRTAP1-5      | 0.46   | 1.16  | 0.723  |
|  | ANXA3         | 0.554  | 1.361 | 0.885  |
|  | MYO15A        | 0.373  | 1.206 | 0.856  |
|  | MMP10         | 1.042  | 3.496 | 2.488  |
|  | HKDC1         | 0.244  | 1.276 | 0.558  |
|  | ENC1          | 0.372  | 1.984 | 0.979  |
|  | SLC2A7        | 0.381  | 1.57  | 0.65   |
|  | SCAND3        | 0.289  | 1.236 | 0.522  |
|  | OR52N2        | 0.428  | 1.683 | 0.625  |
|  | CALB2         | 0.616  | 2.036 | 0.911  |
|  | LOC100132338  | 0.769  | 1.981 | 0.71   |
|  | EIF4EBP1      | 0.44   | 1.112 | 0.34   |
|  | PCK2          | 0.349  | 1.297 | 0.429  |
|  | KCNG1         | 0.633  | 2.116 | 0.707  |
|  | COL13A1       | 0.453  | 1.299 | 0.414  |
|  | C15orf17      | 0.516  | 1.618 | 0.51   |
|  | TYR           | -0.02  | 1.078 | 0.238  |
|  | ASB15         | -0.15  | 1.496 | 0.328  |
|  | PYCR1         | -0.105 | 1.093 | 0.348  |
|  | LOC729187     | -0.065 | 1.177 | 0.43   |
|  | ABHD10        | -0.041 | 1.908 | 0.682  |
|  | RP11-374F3.4  | -0.001 | 1.922 | 0.561  |
|  | LOC100132893  | -0.059 | 1.434 | 0.425  |
|  | ENPP2         | -0.253 | 1.393 | 0.685  |
|  | KLHL10        | -0.068 | 1.02  | 0.494  |
|  | CD52          | -0.094 | 1     | 0.411  |
|  | GIPC2         | -0.437 | 1.868 | 0.649  |
|  | NDUFA4L2      | 0.132  | 1.439 | 0.85   |
|  | ABCA6         | 0.071  | 1.031 | 0.536  |
|  | FAM19A1       | 0.082  | 1.388 | 0.59   |
|  | GPA33         | 0.063  | 1.437 | -0.015 |
|  | CYYR1         | 0.17   | 1.155 | -0.013 |
|  | KCNJ2         | 0.305  | 1.402 | 0.188  |
|  | LPO           | 0.498  | 1.794 | 0.247  |
|  | DKFZp686K1684 | 0.316  | 1.205 | 0.211  |

|  |  |  |  |               |        |        |       |    |
|--|--|--|--|---------------|--------|--------|-------|----|
|  |  |  |  | AARS          | 0.286  | 1.002  | 0.194 |    |
|  |  |  |  | LOC100132829  | 0.476  | 1.617  | 0.417 |    |
|  |  |  |  | FLJ16341      | 0.35   | 1.19   | 0.267 |    |
|  |  |  |  | SLC6A9        | 0.422  | 1.581  | 0.087 |    |
|  |  |  |  | C1orf210      | 0.26   | 1.07   | 0.058 |    |
|  |  |  |  | APOL3         | 0.184  | 1.012  | 0.08  |    |
|  |  |  |  | ALDH1L2       | 0.187  | 1.842  | 0.331 |    |
|  |  |  |  | LOC201651     | 0.094  | 1.009  | 0.172 |    |
|  |  |  |  | AKNA          | 0.099  | 1.035  | 0.167 |    |
|  |  |  |  | HMGA2         | 0.056  | 1.113  | 0.184 |    |
|  |  |  |  | MYOZ1         | 0.115  | 1.271  | 0.136 |    |
|  |  |  |  | LOC283867     | 0.017  | 1.433  | 0.153 |    |
|  |  |  |  | C1orf120      | 0.074  | 1.879  | 0.229 |    |
|  |  |  |  | TTC23L        | -0.022 | 1.08   | 0.146 |    |
|  |  |  |  | OR7G3         | 0.399  | 2.203  | 0.708 |    |
|  |  |  |  | SLC45A3       | 0.253  | 1.281  | 0.366 |    |
|  |  |  |  | PHGDH         | 0.356  | 1.99   | 0.532 |    |
|  |  |  |  | PRF1          | 0.336  | 2.291  | 0.491 |    |
|  |  |  |  | LOC100128571  | 0.076  | 1.357  | 0.335 |    |
|  |  |  |  | CBS           | 0.164  | 2.054  | 0.529 |    |
|  |  |  |  | C8orf22       | 0.796  | 0.164  | 1.373 |    |
|  |  |  |  | C5orf22       | 0.621  | 0.114  | 1.087 |    |
|  |  |  |  | ZC3H12A       | 1.146  | 0.323  | 2.101 |    |
|  |  |  |  | TRPM7         | 0.755  | 0.235  | 1.716 |    |
|  |  |  |  | TBX3          | 0.73   | 0.179  | 1.434 |    |
|  |  |  |  | CTAG1A        | 0.678  | 0.159  | 1.416 |    |
|  |  |  |  | NOTUM         | 0.583  | 0.051  | 1.196 |    |
|  |  |  |  | KCNQ1OT1      | 0.797  | -0.051 | 1.484 |    |
|  |  |  |  | NFKBIA        | 0.559  | -0.087 | 1.179 |    |
|  |  |  |  | FLJ33065      | 0.446  | -0.08  | 1.012 |    |
|  |  |  |  | NME5          | 0.937  | 0.166  | 1.11  |    |
|  |  |  |  | MOXD1         | 1.145  | 0.091  | 1.122 |    |
|  |  |  |  | ERLIN1        | 1.071  | 0.201  | 0.814 |    |
|  |  |  |  | SMC4          | 0.867  | 0.505  | 1.141 |    |
|  |  |  |  | DIRAS3        | 0.936  | 0.519  | 1.181 |    |
|  |  |  |  | KIF14         | 0.859  | 0.526  | 1.116 |    |
|  |  |  |  | CCL2          | 1.566  | 0.932  | 1.933 |    |
|  |  |  |  | ATAD2         | 0.795  | 0.532  | 1.045 |    |
|  |  |  |  | CENPF         | 0.991  | 0.593  | 1.124 |    |
|  |  |  |  | C1orf27       | 1.134  | 0.734  | 1.378 |    |
|  |  |  |  | C20orf107     | 1.125  | 0.507  | 1.338 |    |
|  |  |  |  | ZNF615        | 0.993  | 0.47   | 1.2   |    |
|  |  |  |  | DKFZp686M1136 | 1.456  | 0.697  | 1.789 |    |
|  |  |  |  | ESCO1         | 0.971  | 0.466  | 1.078 |    |
|  |  |  |  | PER2          | 1.349  | 0.537  | 1.692 |    |
|  |  |  |  | TRIP11        | 0.802  | 0.562  | 1.218 | UP |
|  |  |  |  | CSPP1         | 0.779  | 0.552  | 1.19  | UP |
|  |  |  |  | SCML1         | 0.979  | 0.691  | 1.549 | UP |
|  |  |  |  | MYBL1         | 0.788  | 0.537  | 1.203 | UP |
|  |  |  |  | DNTTIP2       | 0.748  | 0.477  | 1.128 | UP |
|  |  |  |  | SNAPC1        | 0.83   | 0.565  | 1.16  | UP |
|  |  |  |  | TRIB1         | 0.855  | 0.563  | 1.223 | UP |
|  |  |  |  | C14orf106     | 0.967  | 0.607  | 1.358 |    |
|  |  |  |  | LRRC69        | 0.807  | 0.43   | 1.171 |    |
|  |  |  |  | SBNO1         | 0.757  | 0.438  | 1.128 |    |
|  |  |  |  | HAT1          | 0.687  | 0.387  | 1.015 |    |
|  |  |  |  | CEP97         | 1.114  | 0.66   | 1.583 |    |
|  |  |  |  | C7orf63       | 1.075  | 0.642  | 1.522 |    |
|  |  |  |  | C10orf118     | 1.638  | 1.012  | 2.636 | UP |
|  |  |  |  | ARGLU1        | 1.021  | 0.66   | 1.646 | UP |
|  |  |  |  | GOLGA8A       | 1.29   | 0.767  | 2.018 | UP |
|  |  |  |  | STXBP3        | 1      | 1.003  | 0.848 |    |
|  |  |  |  | CLIP1         | 1.469  | 1.438  | 1.221 |    |
|  |  |  |  | NPFF          | 1.101  | 1.099  | 0.97  |    |
|  |  |  |  | PSG5          | 0.953  | 1.045  | 0.905 |    |
|  |  |  |  | LOC440995     | 0.952  | 1.008  | 0.868 |    |
|  |  |  |  | TCP11L2       | 2.342  | 2.166  | 1.688 |    |
|  |  |  |  | CEP70         | 1.619  | 1.478  | 1.148 |    |
|  |  |  |  | VAMP4         | 1.448  | 1.315  | 1.065 |    |
|  |  |  |  | LYG1          | 2.026  | 1.778  | 1.465 |    |
|  |  |  |  | LOC439911     | 1.134  | 1.049  | 0.896 |    |
|  |  |  |  | ACYP1         | 1.552  | 1.446  | 1.199 |    |
|  |  |  |  | CAPZA3        | 1.04   | 0.975  | 0.71  |    |
|  |  |  |  | LOC390595     | 2.308  | 2.431  | 1.915 |    |
|  |  |  |  | CXCL5         | 1.411  | 1.53   | 1.171 |    |
|  |  |  |  | DRD4          | 1.472  | 1.503  | 1.14  |    |
|  |  |  |  | CDKL3         | 1.277  | 1.293  | 0.975 |    |
|  |  |  |  | ANGPTL4       | 1.733  | 1.703  | 1.309 |    |
|  |  |  |  | RFK           | 1.053  | 1.138  | 0.799 |    |
|  |  |  |  | FBXW10        | 1.627  | 1.682  | 1.197 |    |
|  |  |  |  | SCLT1         | 1.866  | 1.673  | 1.206 |    |
|  |  |  |  | AGER          | 1.331  | 1.176  | 0.825 |    |
|  |  |  |  | CD70          | 1.031  | 0.876  | 0.672 |    |
|  |  |  |  | GLRA3         | 1.049  | 0.858  | 0.594 |    |
|  |  |  |  | UCN           | 1.099  | 0.926  | 0.655 |    |
|  |  |  |  | FLJ25006      | 1.606  | 1.345  | 0.95  |    |
|  |  |  |  | INTS2         | 1.107  | 0.959  | 0.654 |    |
|  |  |  |  | ZBTB41        | 1.13   | 1.095  | 0.719 |    |



|                |       |       |       |
|----------------|-------|-------|-------|
| MBNL2          | 1.836 | 1.767 | 1.151 |
| POLI           | 1.346 | 1.219 | 0.797 |
| CYorf15B       | 1.662 | 1.571 | 0.992 |
| NAALAD2        | 1.009 | 0.975 | 0.55  |
| HINT3          | 1.089 | 0.986 | 0.573 |
| CDH19          | 1.033 | 0.889 | 0.556 |
| NCRNA00204B    | 1.106 | 1.354 | 0.963 |
| MIMT1          | 0.879 | 1.088 | 0.779 |
| UBL3           | 0.847 | 1.007 | 0.76  |
| C20orf144      | 0.878 | 1.051 | 0.827 |
| NCRNA00081     | 1.288 | 1.684 | 1.111 |
| IL17B          | 0.979 | 1.353 | 0.871 |
| BCAP29         | 0.894 | 1.201 | 0.765 |
| C1GALT1C1      | 0.913 | 1.145 | 0.732 |
| TUBE1          | 1.818 | 2.515 | 1.464 |
| RHOF           | 0.885 | 1.172 | 0.692 |
| NLRC3          | 0.802 | 1.045 | 0.6   |
| MTHFD2         | 1.291 | 1.721 | 0.951 |
| WNT4           | 1.061 | 1.275 | 0.713 |
| CHST7          | 1.007 | 1.255 | 0.713 |
| PSORS1C3       | 2.384 | 2.791 | 1.831 |
| ZNF506         | 0.915 | 1.041 | 0.665 |
| TNPO1          | 1.442 | 1.59  | 1.059 |
| PDIK1L         | 0.775 | 1.041 | 0.489 |
| ARL6           | 0.758 | 1.105 | 0.503 |
| PYROXD1        | 0.755 | 1.147 | 0.595 |
| NTSE           | 1.129 | 1.628 | 0.847 |
| SCG5           | 1.736 | 2.12  | 1.75  |
| PAQR5          | 1.37  | 1.662 | 1.365 |
| OR8H3          | 0.879 | 1.107 | 0.899 |
| CMPK1          | 0.857 | 1.086 | 0.898 |
| STAMBPL1       | 1.149 | 1.44  | 1.175 |
| SNHG8          | 0.978 | 1.247 | 0.967 |
| DKFZp686L14188 | 2.238 | 2.77  | 2.548 |
| C5orf44        | 1.115 | 1.348 | 1.244 |
| CG030          | 0.885 | 1.121 | 0.99  |
| ANAPC10        | 0.852 | 1.07  | 0.955 |
| SLC36A4        | 1.253 | 1.579 | 1.432 |
| SDCCAG10       | 0.865 | 1.079 | 0.93  |
| CD97           | 0.9   | 1.026 | 0.912 |
| TWSG1          | 0.971 | 1.13  | 1.014 |
| CDSN           | 0.934 | 1.102 | 0.991 |
| C6orf174       | 1.038 | 1.216 | 1.074 |
| GKN2           | 1.037 | 1.208 | 1.117 |
| CSAG3          | 1.07  | 1.194 | 1.109 |
| LOC728769      | 1.079 | 1.257 | 1.069 |
| LOC284288      | 1.203 | 1.677 | 1.556 |
| BCL2A1         | 1.204 | 1.695 | 1.566 |
| MPP3           | 1.122 | 1.591 | 1.415 |
| IKBIP          | 1.067 | 1.55  | 1.383 |
| HIST3H2A       | 1.272 | 1.672 | 1.624 |
| C12orf35       | 1.324 | 1.72  | 1.679 |
| STX16          | 0.99  | 1.286 | 1.207 |
| AMN1           | 1.613 | 2.103 | 1.98  |
| LOC730441      | 0.772 | 1.061 | 0.924 |
| HSPA13         | 1.138 | 1.541 | 1.364 |
| FAM72D         | 0.797 | 1.054 | 0.908 |
| EPN2           | 0.831 | 1.123 | 0.951 |
| LOC92249       | 1.181 | 1.613 | 1.387 |
| OXR1           | 0.811 | 1.112 | 0.917 |
| OR7C1          | 0.83  | 1.187 | 1.002 |
| PCMTD1         | 0.779 | 1.072 | 0.759 |
| INPP4A         | 0.896 | 1.262 | 0.913 |
| EDEM1          | 1.154 | 1.65  | 1.206 |
| ULK1           | 1.156 | 1.647 | 1.17  |
| CD68           | 0.82  | 1.121 | 0.855 |
| C2orf82        | 1.301 | 1.705 | 1.237 |
| TM2D1          | 0.929 | 1.36  | 0.903 |
| KCTD16         | 0.894 | 1.299 | 0.885 |
| LOC646736      | 1.144 | 1.649 | 1.046 |
| RAP1GAP2       | 0.671 | 1.007 | 0.71  |
| C9orf40        | 0.731 | 1.135 | 0.782 |
| PLAU           | 1.178 | 1.842 | 1.402 |
| CCBL1          | 1.072 | 1.626 | 1.207 |
| TBRG1          | 0.739 | 1.066 | 0.822 |
| C18orf32       | 0.713 | 1.079 | 0.837 |
| BGLAP          | 0.904 | 1.316 | 1.039 |
| VAV1           | 1.007 | 1.994 | 1.679 |
| GARS           | 0.732 | 1.424 | 1.217 |
| RSL24D1        | 0.859 | 1.555 | 1.341 |
| FOLH1B         | 0.685 | 1.231 | 1.046 |
| TMEM216        | 0.556 | 1.023 | 0.884 |
| RANGRF         | 0.654 | 1.178 | 0.976 |
| ULBP1          | 2.274 | 4.235 | 3.488 |
| PTCHD2         | 0.7   | 1.315 | 1.1   |
| GREM2          | 0.544 | 1.024 | 0.846 |
| PODXL          | 1.045 | 2.083 | 1.696 |
| LOC100130721   | 0.821 | 1.669 | 1.351 |

|              |       |       |       |    |
|--------------|-------|-------|-------|----|
| ANKRD20B     | 0.725 | 1.477 | 1.16  |    |
| ADAM19       | 0.549 | 1.101 | 0.88  |    |
| PRKCE        | 0.954 | 1.757 | 1.4   |    |
| LOC100289026 | 1.275 | 2.242 | 1.763 |    |
| APIS2        | 0.713 | 1.364 | 1.023 |    |
| DVL1         | 0.712 | 1.187 | 0.917 |    |
| WNT7A        | 0.667 | 1.112 | 0.879 |    |
| ACCN3        | 1.265 | 2.127 | 1.695 |    |
| RHCG         | 1.237 | 2.018 | 1.586 |    |
| COL7A1       | 0.916 | 1.491 | 1.193 |    |
| SPANXB2      | 0.7   | 1.162 | 0.988 |    |
| LOC391081    | 0.753 | 1.235 | 1.053 |    |
| ORMDL1       | 0.818 | 1.354 | 1.155 |    |
| DPY19L1      | 0.647 | 1.098 | 0.933 |    |
| SLC2A1       | 0.685 | 1.158 | 0.963 |    |
| SPCS3        | 0.82  | 1.24  | 1.079 |    |
| PCDH1        | 0.811 | 1.254 | 1.044 |    |
| ZNF773       | 0.966 | 2.014 | 1.403 |    |
| SLC22A4      | 0.596 | 1.24  | 0.829 |    |
| CARS         | 0.541 | 1.204 | 0.833 |    |
| BCL2L2       | 0.496 | 1.145 | 0.784 |    |
| TMEM158      | 1.11  | 2.358 | 1.704 |    |
| SLC38A1      | 0.658 | 1.457 | 1.074 |    |
| VLDLR        | 0.915 | 1.672 | 1.207 |    |
| LSM5         | 0.55  | 1.027 | 0.713 |    |
| CLCN4        | 0.724 | 1.426 | 1.01  |    |
| SNTB1        | 0.571 | 1.067 | 0.623 |    |
| TTY5         | 0.626 | 1.205 | 0.717 |    |
| DLEC1        | 0.587 | 1.103 | 0.669 |    |
| TXK          | 0.652 | 1.303 | 0.77  |    |
| SLAMF8       | 0.718 | 1.31  | 0.822 |    |
| NRN1L        | 1.437 | 2.785 | 1.504 |    |
| CEACAM21     | 0.607 | 1.107 | 0.621 |    |
| COX17        | 0.648 | 1.023 | 0.656 |    |
| NUPR1        | 2.129 | 3.48  | 2.283 |    |
| LOC643401    | 1.119 | 1.884 | 1.209 |    |
| BMF          | 0.724 | 1.226 | 0.784 |    |
| TRAPPC2P1    | 1.071 | 1.943 | 1.275 |    |
| NFE2L1       | 0.596 | 1.057 | 0.706 |    |
| MTL5         | 1.092 | 1.845 | 1.268 |    |
| HAPLN3       | 1.039 | 0.603 | 0.814 |    |
| CD38         | 1.113 | 0.635 | 0.91  |    |
| AHI1         | 1.577 | 0.909 | 1.146 |    |
| SMC2         | 1.007 | 0.678 | 0.817 |    |
| OVOS         | 1.026 | 0.69  | 0.87  |    |
| PILRB        | 1.677 | 1.146 | 1.498 |    |
| LOC729051    | 1.165 | 0.78  | 1.067 |    |
| C4orf21      | 1.085 | 0.66  | 1.051 |    |
| SPINK6       | 1.108 | 0.69  | 1.212 |    |
| RGMA         | 1.208 | 0.759 | 1.272 |    |
| LUC7L3       | 1.282 | 0.768 | 1.313 |    |
| SAT1         | 0.943 | 0.642 | 1.012 |    |
| BOD1L        | 1.568 | 1.087 | 1.722 |    |
| TBC1D3G      | 1.552 | 1.097 | 1.545 |    |
| PILRA        | 1.429 | 0.981 | 1.41  |    |
| BREA2        | 1.095 | 0.762 | 1.094 |    |
| HOXA1        | 0.977 | 0.688 | 1.008 |    |
| GOLGA4       | 1.531 | 1.025 | 1.541 |    |
| ST3GAL5      | 1.302 | 0.931 | 1.274 |    |
| SETDB1       | 1.023 | 0.757 | 0.999 |    |
| CENPE        | 1.794 | 1.364 | 1.846 |    |
| KTN1         | 1.113 | 0.533 | 0.938 |    |
| CUZD1        | 1.396 | 0.7   | 1.228 |    |
| ANKRD12      | 1.319 | 0.663 | 1.136 |    |
| C2orf60      | 1.228 | 1.259 | 1.266 | UP |
| BICD1        | 1.37  | 1.412 | 1.385 |    |
| REC8         | 3.007 | 3.162 | 3.119 |    |
| SFRS18       | 1.848 | 1.868 | 1.864 |    |
| USP53        | 1.821 | 1.945 | 1.836 |    |
| KLF9         | 1.152 | 1.234 | 1.246 | UP |
| CHKB         | 1.089 | 1.188 | 1.21  | UP |
| ZC3H7A       | 1.005 | 1.092 | 1.082 |    |
| TIMD4        | 2.043 | 2.02  | 2.059 | UP |
| RNF215       | 1.302 | 1.281 | 1.305 | UP |
| RB1CC1       | 0.966 | 0.956 | 1.006 | UP |
| ITGAV        | 0.979 | 0.952 | 1.006 | UP |
| RICTOR       | 1.256 | 1.149 | 1.226 | UP |
| NUF2         | 1.275 | 1.19  | 1.25  | UP |
| GNRH1        | 3.177 | 3.029 | 2.994 |    |
| CASD1        | 1.65  | 1.622 | 1.535 |    |
| TMEM206      | 0.927 | 0.913 | 1.029 | UP |
| BNIP2        | 1.064 | 1.037 | 1.142 | UP |
| N4BP2L2      | 1.229 | 1.253 | 1.365 | UP |
| C8orf68      | 0.992 | 1.031 | 1.121 | UP |
| C13orf37     | 1.336 | 1.402 | 1.463 | UP |
| KIAA0408     | 1.372 | 1.495 | 1.621 | UP |
| C12orf73     | 0.884 | 0.973 | 1.057 | UP |
| LOC400027    | 1.885 | 1.996 | 2.227 | UP |

|              |       |       |       |    |
|--------------|-------|-------|-------|----|
| CTSK         | 2.583 | 2.848 | 2.971 | UP |
| ZDHC11B      | 1.835 | 1.628 | 1.753 | UP |
| CCDC116      | 1.116 | 0.95  | 1.049 | UP |
| ZDHC11       | 1.736 | 1.55  | 1.795 | UP |
| NCRNA00201   | 1.63  | 1.473 | 1.695 | UP |
| TYW3         | 1.541 | 1.413 | 1.593 | UP |
| C1orf162     | 1.349 | 1.247 | 1.378 | UP |
| GOLGA6L10    | 1.345 | 1.091 | 1.321 |    |
| ARHGAP11A    | 1.191 | 0.989 | 1.185 | UP |
| hCG_2015435  | 1.573 | 1.297 | 1.572 | UP |
| NKTR         | 1.224 | 1.049 | 1.24  | UP |
| ROCK1        | 1.448 | 1.165 | 1.534 | UP |
| LOC284513    | 1.664 | 1.351 | 1.749 | UP |
| LOC374890    | 1.902 | 1.567 | 1.942 | UP |
| CWF19L2      | 1.692 | 1.379 | 1.735 | UP |
| MAN2A2       | 1.916 | 1.725 | 1.674 |    |
| LMO7         | 1.056 | 0.975 | 0.921 |    |
| NCRNA00115   | 1.217 | 1.043 | 1.097 |    |
| CCDC82       | 1.129 | 0.984 | 1.014 | UP |
| CCDC126      | 1.279 | 1.121 | 1.119 |    |
| ABCB10       | 1.109 | 0.978 | 0.985 | UP |
| IFI27        | 1.23  | 1.032 | 1.051 |    |
| ADRA1B       | 1.842 | 1.565 | 1.552 |    |
| RAB40C       | 1.126 | 0.914 | 0.922 |    |
| CPT1B        | 2.332 | 1.884 | 1.993 |    |
| ARHGAP5      | 1.274 | 1.014 | 1.055 |    |
| HERC2P2      | 1.661 | 1.2   | 1.158 |    |
| ELMO3        | 1.026 | 0.77  | 0.751 |    |
| LOC643008    | 2.16  | 1.497 | 1.562 |    |
| LOC283588    | 1.295 | 0.907 | 0.955 |    |
| AKAP9        | 1.499 | 1.117 | 1.247 |    |
| SIAE         | 1.211 | 0.879 | 0.95  |    |
| LOC285771    | 1.217 | 0.898 | 0.939 |    |
| CALML4       | 1.46  | 1.065 | 1.121 |    |
| KCNA10       | 1.104 | 0.854 | 0.86  |    |
| OSGIN1       | 1.51  | 1.205 | 1.066 |    |
| OR2B6        | 1.176 | 0.913 | 0.804 |    |
| CMTM3        | 0.227 | 1.098 | 0.857 |    |
| DDB2         | 0.357 | 1.128 | 0.927 |    |
| AP4S1        | 0.311 | 1.108 | 0.912 |    |
| TXNIP        | 1.079 | 3.602 | 3.142 |    |
| NKX2-4       | 0.22  | 1.076 | 1.01  |    |
| LOC646470    | 0.238 | 1.123 | 1.008 |    |
| CDCP1        | 0.571 | 2.168 | 1.97  |    |
| YARS         | 0.32  | 1.326 | 1.213 |    |
| OGFRL1       | 0.365 | 1.53  | 1.41  |    |
| ST3GAL1      | 0.45  | 1.254 | 0.991 |    |
| SERAC1       | 0.392 | 1.065 | 0.86  |    |
| C15orf48     | 1.224 | 2.933 | 2.409 |    |
| SLC7A1       | 0.585 | 1.584 | 1.433 |    |
| TSC22D3      | 0.654 | 1.792 | 1.601 |    |
| LOC100130938 | 0.68  | 1.92  | 1.705 |    |
| ZNF655       | 0.396 | 1.001 | 0.897 |    |
| ESAM         | 1.157 | 2.935 | 2.555 |    |
| CLIC4        | 0.515 | 1.369 | 1.199 |    |
| TTC17        | 0.494 | 1.171 | 1.171 | UP |
| ALG13        | 0.496 | 1.159 | 1.12  | UP |
| KSR2         | 0.773 | 1.941 | 1.815 |    |
| CCDC112      | 0.761 | 1.935 | 1.831 |    |
| SKA2         | 0.462 | 1.179 | 1.117 |    |
| PANX3        | 0.455 | 1.165 | 1.088 |    |
| TMEM87B      | 0.587 | 1.392 | 1.238 |    |
| TFAP2B       | 0.517 | 1.217 | 1.125 |    |
| HIST1H1T     | 0.534 | 1.154 | 1.1   | UP |
| UCN2         | 0.816 | 1.668 | 1.496 |    |
| CITED4       | 0.483 | 1.001 | 0.915 |    |
| SLC39A1      | 0.533 | 1.131 | 0.97  |    |
| GRB10        | 0.478 | 1.246 | 1.39  | UP |
| BOD1         | 0.344 | 0.904 | 1.014 | UP |
| RYK          | 0.423 | 1.062 | 1.168 | UP |
| CDAN1        | 0.509 | 1.218 | 1.393 | UP |
| PEAR1        | 1.056 | 2.941 | 3.327 | UP |
| AXL          | 0.576 | 1.648 | 1.808 | UP |
| ZBTB44       | 0.426 | 1.229 | 1.412 | UP |
| TFAP2C       | 0.471 | 1.248 | 1.445 | UP |
| TMEM126A     | 0.36  | 0.901 | 1.096 | UP |
| ITPRIP       | 0.534 | 1.338 | 1.602 | UP |
| IL10RB       | 0.44  | 1.083 | 1.285 | UP |
| BRWD1        | 0.36  | 0.875 | 1.025 | UP |
| TRIAP1       | 0.449 | 1.125 | 1.309 | UP |
| RASGRF2      | 0.401 | 1.076 | 1.296 | UP |
| FAM24B       | 1.008 | 2.506 | 2.543 | UP |
| C1orf133     | 1.082 | 2.755 | 2.863 | UP |
| HIFX         | 0.676 | 1.591 | 1.656 | UP |
| DOCK4        | 0.563 | 1.255 | 1.386 | UP |
| DDX6         | 0.56  | 1.298 | 1.417 | UP |
| TFPI2        | 0.72  | 1.675 | 1.791 | UP |
| IL20RB       | 0.749 | 1.717 | 1.878 | UP |

|              |        |       |       |    |
|--------------|--------|-------|-------|----|
| GDI1         | 0.39   | 0.922 | 1.003 | UP |
| SLC22A5      | 0.603  | 1.468 | 1.572 | UP |
| LAT2         | 0.817  | 2.641 | 2.733 |    |
| ASB10        | 0.486  | 1.685 | 1.713 |    |
| DLC1         | 0.324  | 1.126 | 1.098 |    |
| SLC3A2       | 0.498  | 1.422 | 1.489 |    |
| SEC61A2      | 0.516  | 1.422 | 1.481 | UP |
| FEZ2         | 0.328  | 0.98  | 1.037 |    |
| TRIT1        | 0.404  | 1.119 | 1.112 |    |
| SLC25A32     | 0.247  | 1.26  | 1.257 |    |
| FAM18B2      | 0.183  | 1.035 | 1.033 |    |
| SAMD5        | 0.278  | 1.691 | 1.775 |    |
| LAMC2        | 0.694  | 3.013 | 3.093 |    |
| NPC1         | 0.33   | 1.276 | 1.378 |    |
| LOC283585    | 0.259  | 1.051 | 1.137 |    |
| RSPH9        | 0.274  | 1.193 | 1.293 |    |
| SESN1        | 0.497  | 1.748 | 1.874 |    |
| LYPD1        | 0.386  | 1.366 | 1.486 |    |
| LOC285758    | 0.265  | 0.951 | 1.078 |    |
| ARHGEF18     | 0.309  | 1.125 | 1.286 |    |
| ODC1         | 0.292  | 1.455 | 1.617 |    |
| MMP9         | 0.261  | 1.312 | 1.423 |    |
| CYP26A1      | -0.084 | 1.329 | 1.336 |    |
| CCR1         | -0.21  | 1.084 | 1.042 |    |
| MOBK12B      | 0.114  | 1.042 | 0.857 |    |
| FAM90A7      | 0.072  | 1.015 | 0.821 |    |
| EPHB2        | 0.215  | 1.693 | 1.747 |    |
| ANKRD18A     | 0.126  | 1.424 | 1.471 |    |
| UPP1         | 0.092  | 1.769 | 1.837 |    |
| TLE3         | 0.006  | 1.402 | 1.603 |    |
| LOC100133728 | 0.018  | 0.95  | 1.151 |    |
| IRX2         | 0.031  | 0.949 | 1.135 |    |
| HIST1H2AC    | 0.04   | 0.921 | 1.093 |    |
| LOC100133660 | 0.067  | 0.783 | 1.006 |    |
| H1FO         | 0.153  | 1.747 | 2.063 |    |
| IRX4         | 0.15   | 0.996 | 1.145 |    |
| RAB11B       | 0.161  | 1.002 | 1.255 |    |
| LOC388965    | 0.195  | 1.037 | 1.256 |    |
| FAM196B      | 0.241  | 1.341 | 1.597 |    |
| ZNF14        | 0.232  | 1.144 | 1.399 |    |
| KIAA1644     | 0.377  | 1.894 | 2.38  |    |
| SAMD4A       | 0.249  | 1.658 | 2.208 |    |
| EIF2B5       | 0.102  | 0.774 | 1.03  |    |
| LOC392335    | 0.267  | 1.741 | 2.301 |    |
| CLEC18B      | 0.128  | 0.8   | 1.065 |    |
| PLEK2        | 0.199  | 1.24  | 1.642 |    |
| ZNF609       | 0.478  | 1.069 | 1.305 | UP |
| LY6K         | 1.47   | 3.309 | 3.886 | UP |
| CALML6       | 0.636  | 1.455 | 1.732 | UP |
| ABTB2        | 0.831  | 1.773 | 2.122 | UP |
| SLC22A1      | 0.558  | 1.205 | 1.371 | UP |
| PVR          | 0.919  | 1.91  | 2.206 | UP |
| HERPUD1      | 0.419  | 0.894 | 1.015 | UP |
| C12orf60     | 1.009  | 2.091 | 2.421 | UP |
| CNNM3        | 0.5    | 0.984 | 1.171 | UP |
| ALG14        | 0.476  | 0.917 | 1.095 | UP |
| GFM1         | 0.566  | 1.112 | 1.346 | UP |
| GDF15        | 1.072  | 2.099 | 2.452 | UP |
| CSGALNACT2   | 0.917  | 1.781 | 2.1   | UP |
| ELOVL1       | 0.467  | 0.953 | 1.136 | UP |
| EDA2R        | 0.651  | 1.3   | 1.568 | UP |
| CDKN1A       | 1.341  | 2.658 | 3.215 | UP |
| CCBE1        | 0.657  | 1.289 | 1.57  | UP |
| PLCXD2       | 0.626  | 1.286 | 1.531 | UP |
| QSOX1        | 0.527  | 0.982 | 1.175 | UP |
| MED30        | 0.752  | 1.39  | 1.662 | UP |
| PTTG3P       | 0.466  | 0.856 | 1     | UP |
| GRPEL2       | 0.423  | 0.786 | 1.025 | UP |
| CSNK1E       | 0.502  | 0.932 | 1.215 | UP |
| VASN         | 1.014  | 1.92  | 2.497 | UP |
| C20orf194    | 0.534  | 0.989 | 1.284 | UP |
| C10orf54     | 1.118  | 2.143 | 2.737 | UP |
| TERF2        | 0.413  | 0.804 | 1.016 | UP |
| SERINC1      | 0.605  | 1.097 | 1.39  | UP |
| RG9MTD2      | 0.909  | 1.689 | 2.151 | UP |
| LOC100130320 | 0.52   | 1.003 | 1.245 | UP |
| FOXO3        | 1.026  | 1.913 | 2.396 | UP |
| HECA         | 0.647  | 1.111 | 1.459 | UP |
| CDKN1C       | 0.629  | 1.11  | 1.447 | UP |
| ZNRD1        | 0.506  | 0.854 | 1.113 | UP |
| YPEL2        | 0.569  | 0.983 | 1.28  | UP |
| UTY          | 0.817  | 1.403 | 1.805 | UP |
| TMEM167B     | 1.067  | 1.877 | 2.41  | UP |
| SEMA4C       | 0.469  | 0.815 | 1.065 | UP |
| C6orf35      | 1.095  | 1.903 | 2.458 | UP |
| AKT3         | 0.468  | 0.832 | 1.067 | UP |
| ELK3         | 0.898  | 1.591 | 1.988 | UP |
| ATG4D        | 0.82   | 1.42  | 1.798 | UP |

|           |       |       |       |    |
|-----------|-------|-------|-------|----|
| FRZB      | 0.613 | 1.045 | 1.316 | UP |
| MYEF2     | 0.78  | 1.367 | 1.704 | UP |
| B4GALT3   | 0.486 | 0.872 | 1.082 | UP |
| WIPF1     | 0.734 | 1.314 | 1.617 | UP |
| MICA      | 0.525 | 0.931 | 1.116 | UP |
| MAP2K1    | 0.49  | 0.841 | 1.034 | UP |
| PDP1      | 0.709 | 1.163 | 1.359 | UP |
| BAK1      | 0.729 | 1.218 | 1.422 | UP |
| ATAD1     | 1     | 1.631 | 1.957 | UP |
| C10orf35  | 0.629 | 1.053 | 1.253 | UP |
| ABHD2     | 0.681 | 1.164 | 1.387 | UP |
| SLC35F2   | 1.118 | 1.958 | 2.314 | UP |
| CSNK1A1L  | 0.558 | 0.965 | 1.131 | UP |
| LOC730167 | 0.692 | 1.076 | 1.268 | UP |
| LOC221710 | 1.291 | 2.006 | 2.345 | UP |
| STK40     | 1.098 | 1.688 | 2.024 | UP |
| BMI1      | 0.632 | 0.955 | 1.146 | UP |
| UFM1      | 1.186 | 1.848 | 2.217 | UP |
| CTNNAL1   | 1.122 | 1.755 | 2.093 | UP |
| CCDC58    | 0.627 | 0.971 | 1.176 | UP |
| FLJ45721  | 0.563 | 0.87  | 1.086 | UP |
| C1orf77   | 1.024 | 1.563 | 1.979 | UP |
| TMEM87A   | 1.019 | 1.519 | 1.92  | UP |
| TNFRSF10D | 1.632 | 2.553 | 3.172 | UP |
| IL8       | 2.94  | 4.529 | 5.556 | UP |
| SETD7     | 0.619 | 1.015 | 1.252 | UP |
| C9orf21   | 0.752 | 1.199 | 1.502 | UP |
| ZNF805    | 1.119 | 1.827 | 2.262 | UP |
| KCNJ14    | 0.731 | 1.168 | 1.525 | UP |
| GOLT1B    | 0.562 | 0.917 | 1.196 | UP |
| FAM18B    | 0.682 | 1.105 | 1.417 | UP |
| DGKH      | 0.5   | 0.816 | 1.034 | UP |
| PTPLB     | 0.917 | 1.409 | 1.852 | UP |
| EREG      | 1.932 | 2.974 | 3.872 | UP |
| CLDN1     | 1.184 | 1.875 | 2.415 | UP |
| MARCH4    | 1.434 | 2.228 | 2.935 | UP |
| SESN2     | 1.375 | 2.138 | 2.804 | UP |
| RABL3     | 0.541 | 0.845 | 1.088 | UP |
| SBDSP     | 0.806 | 1.196 | 1.59  | UP |
| RPL22L1   | 0.588 | 0.868 | 1.142 | UP |
| ROR1      | 1.229 | 1.811 | 2.416 | UP |
| PLOD2     | 0.906 | 1.335 | 1.752 | UP |
| SLC35A3   | 0.527 | 1.022 | 0.989 | UP |
| DDR2      | 0.61  | 1.168 | 1.115 | UP |
| TAP1      | 0.736 | 1.417 | 1.376 | UP |
| PRNP      | 0.811 | 1.507 | 1.507 | UP |
| FST       | 1.193 | 2.195 | 2.207 | UP |
| C10orf47  | 0.997 | 1.846 | 1.832 | UP |
| RNF41     | 0.573 | 1.158 | 1.16  | UP |
| PRR24     | 0.96  | 1.941 | 1.931 | UP |
| JHDM1D    | 1.033 | 2.051 | 2.063 | UP |
| RNF152    | 0.524 | 0.909 | 1.011 | UP |
| ING5      | 0.685 | 1.177 | 1.335 | UP |
| SLMO1     | 1.333 | 2.347 | 2.578 | UP |
| KIAA0513  | 0.681 | 1.191 | 1.302 | UP |
| TCAP      | 0.742 | 1.346 | 1.482 | UP |
| MYEOV     | 0.623 | 1.11  | 1.233 | UP |
| ZIC5      | 0.585 | 0.986 | 1.09  | UP |
| MOSPD1    | 1.345 | 2.2   | 2.458 | UP |
| PAIP2     | 0.745 | 1.363 | 1.398 | UP |
| EIF5A2    | 0.858 | 1.53  | 1.606 | UP |
| SNHG9     | 0.892 | 1.621 | 1.74  | UP |
| CYCS      | 0.512 | 0.971 | 1.02  | UP |
| TIMM44    | 0.907 | 1.845 | 1.94  | UP |
| CHST11    | 0.84  | 1.682 | 1.78  | UP |
| TRIM15    | 0.731 | 1.431 | 1.534 | UP |
| TMBIM1    | 0.606 | 1.209 | 1.247 | UP |
| SMG5      | 0.874 | 1.872 | 2.017 | UP |
| DPH3      | 0.57  | 1.157 | 1.284 | UP |
| C4orf32   | 0.88  | 1.799 | 1.994 | UP |
| MCTP1     | 1.671 | 3.294 | 3.62  | UP |
| C19orf28  | 0.723 | 1.456 | 1.578 | UP |
| TM9SF3    | 0.454 | 0.926 | 1.014 | UP |
| GLIPR1    | 0.922 | 1.743 | 1.939 | UP |
| PFKP      | 0.278 | 0.859 | 1.066 | UP |
| GREM1     | 1.048 | 3.277 | 4.168 | UP |
| SLC39A14  | 0.446 | 1.271 | 1.595 | UP |
| SERPINB8  | 0.706 | 2.349 | 2.879 | UP |
| NOG       | 1.162 | 3.913 | 4.671 | UP |
| LTB       | 1.375 | 4.067 | 4.852 | UP |
| COL4A1    | 0.526 | 1.632 | 1.955 | UP |
| RAB3B     | 0.284 | 1.079 | 1.359 | UP |
| GOLT1A    | 0.838 | 2.881 | 3.654 | UP |
| PRKAG2    | 0.477 | 1.327 | 1.82  | UP |
| NIPAL1    | 0.644 | 1.752 | 2.369 | UP |
| TAF8      | 0.362 | 0.953 | 1.273 | UP |
| SPTLC1    | 0.43  | 1.172 | 1.54  | UP |
| NHS       | 0.41  | 1.182 | 1.563 | UP |

|              |       |       |       |    |
|--------------|-------|-------|-------|----|
| MIS12        | 0.356 | 1.042 | 1.35  | UP |
| TMEM33       | 0.536 | 1.382 | 1.747 | UP |
| DR1          | 0.462 | 1.199 | 1.539 | UP |
| VGf          | 0.489 | 1.308 | 1.647 | UP |
| TRPV1        | 0.531 | 1.395 | 1.735 | UP |
| LOC100127983 | 0.629 | 1.527 | 1.922 | UP |
| CNNM4        | 0.428 | 1.092 | 1.361 | UP |
| SERPINE1     | 1.541 | 3.501 | 4.595 | UP |
| C10orf110    | 1.359 | 3.034 | 4.07  | UP |
| ZDBF2        | 0.658 | 1.425 | 1.918 | UP |
| ELFN2        | 0.648 | 1.447 | 1.986 | UP |
| DNAJB2       | 1.254 | 2.728 | 3.823 | UP |
| SLC7A6OS     | 0.478 | 1.17  | 1.567 | UP |
| MTSSL        | 0.636 | 1.432 | 2.065 | UP |
| LOC392288    | 0.699 | 1.581 | 2.259 | UP |
| NIPAL4       | 0.653 | 1.587 | 2.226 | UP |
| KIAA0556     | 0.434 | 1.068 | 1.497 | UP |
| SDC4         | 1.006 | 2.119 | 3.043 | UP |
| SAR1B        | 0.547 | 1.179 | 1.679 | UP |
| DPH3B        | 0.513 | 1.101 | 1.576 | UP |
| CGB          | 0.376 | 0.782 | 1.132 | UP |
| TOP1P2       | 0.751 | 1.527 | 2.241 | UP |
| TSPAN9       | 0.534 | 0.99  | 1.407 | UP |
| DAGLB        | 0.716 | 1.318 | 1.91  | UP |
| PFDN2        | 0.595 | 1.138 | 1.617 | UP |
| LOC100128009 | 0.518 | 0.987 | 1.394 | UP |
| NUDT4        | 0.555 | 1.079 | 1.538 | UP |
| CYTH1        | 0.638 | 1.232 | 1.776 | UP |
| BRWD3        | 0.586 | 1.193 | 1.643 | UP |
| BBC3         | 1.217 | 2.403 | 3.378 | UP |
| LOC100130996 | 0.978 | 1.998 | 2.751 | UP |
| NCBP2        | 0.53  | 1.027 | 1.371 | UP |
| LOC400568    | 0.517 | 0.973 | 1.318 | UP |
| KIAA1467     | 0.552 | 1.011 | 1.376 | UP |
| FKRP         | 0.53  | 0.997 | 1.343 | UP |
| TNFRSF10A    | 1.044 | 1.956 | 2.656 | UP |
| BRF2         | 0.569 | 1.147 | 1.519 | UP |
| ATG9A        | 0.592 | 1.177 | 1.563 | UP |
| RASA2        | 0.738 | 1.501 | 1.954 | UP |
| TMEM189      | 0.408 | 0.855 | 1.135 | UP |
| KRT10        | 0.498 | 1.067 | 1.418 | UP |
| PSEN1        | 0.452 | 0.932 | 1.229 | UP |
| FNTA         | 0.455 | 0.939 | 1.214 | UP |
| DNMBP        | 0.494 | 1.039 | 1.377 | UP |
| DEPDC1B      | 0.404 | 0.861 | 1.116 | UP |
| ZNF649       | 0.391 | 0.876 | 1.115 | UP |
| CAV3         | 0.383 | 0.918 | 1.343 | UP |
| B3GNT5       | 0.862 | 2.06  | 2.983 | UP |
| WBSCR16      | 0.295 | 0.678 | 1.012 | UP |
| TNFSF9       | 0.555 | 1.299 | 1.919 | UP |
| SUSD1        | 0.287 | 0.673 | 1.032 | UP |
| PIM1         | 0.641 | 1.559 | 2.338 | UP |
| KDM6B        | 1.056 | 2.621 | 3.995 | UP |
| INTU         | 0.348 | 0.86  | 1.283 | UP |
| UHMK1        | 0.286 | 0.79  | 1.116 | UP |
| SLC25A17     | 0.347 | 0.981 | 1.406 | UP |
| TBC1D22B     | 0.563 | 1.439 | 2.057 | UP |
| GALNT2       | 0.305 | 0.799 | 1.134 | UP |
| RPS19BP1     | 0.369 | 0.955 | 1.396 | UP |
| C10orf109    | 0.336 | 0.91  | 1.313 | UP |
| SKIL         | 1.304 | 1.503 | 2.221 | UP |
| AOC3         | 2.36  | 2.672 | 4.05  | UP |
| FGFR1OP2     | 1.003 | 1.151 | 1.752 | UP |
| ANKRD1       | 1.908 | 2.13  | 3.322 | UP |
| LRIG2        | 0.762 | 0.868 | 1.377 | UP |
| KPNA5        | 1.686 | 1.954 | 3.024 | UP |
| PTP4A1       | 0.555 | 0.647 | 1.024 | UP |
| ZNF192       | 0.583 | 0.696 | 1.082 | UP |
| MTM1         | 0.614 | 0.733 | 1.121 | UP |
| DNAJC25      | 1.211 | 1.434 | 2.211 | UP |
| DCUN1D1      | 0.657 | 0.763 | 1.165 | UP |
| ZNF292       | 0.761 | 0.802 | 1.304 | UP |
| RNGTT        | 0.652 | 0.69  | 1.137 | UP |
| PVRL4        | 0.823 | 0.879 | 1.426 | UP |
| NIPBL        | 0.806 | 0.889 | 1.425 | UP |
| IMPA1        | 0.783 | 0.853 | 1.363 | UP |
| ANLN         | 0.842 | 0.892 | 1.428 | UP |
| ZNF644       | 0.614 | 0.684 | 1.117 | UP |
| ZBTB11       | 1.12  | 1.24  | 2.003 | UP |
| ZC3H11A      | 0.796 | 0.871 | 1.448 | UP |
| TOR1AIP1     | 0.714 | 0.79  | 1.334 | UP |
| LIN28B       | 0.686 | 0.779 | 1.294 | UP |
| DDX3Y        | 1.336 | 1.486 | 2.451 | UP |
| GUCA1A       | 0.54  | 0.601 | 1.029 | UP |
| BCL6B        | 0.615 | 0.693 | 1.163 | UP |
| THAP3        | 1.538 | 1.734 | 2.994 | UP |
| LARP1B       | 0.617 | 0.643 | 1.149 | UP |
| HSF2         | 0.779 | 0.82  | 1.437 | UP |

|              |       |       |       |    |
|--------------|-------|-------|-------|----|
| ZNF721       | 0.938 | 0.966 | 1.754 | UP |
| MAP3K15      | 0.691 | 0.735 | 1.305 | UP |
| TM4SF1       | 0.687 | 0.68  | 1.196 | UP |
| STK3         | 0.662 | 0.651 | 1.169 | UP |
| BHLHE40      | 0.75  | 0.784 | 1.342 | UP |
| POU5F1       | 0.831 | 0.815 | 1.393 | UP |
| GGNBP2       | 0.836 | 0.832 | 1.431 | UP |
| TAPT1        | 1.275 | 1.327 | 1.929 | UP |
| OTUD3        | 1.556 | 1.644 | 2.379 | UP |
| PHIP         | 0.749 | 0.726 | 1.107 | UP |
| MAPK8IP3     | 2.044 | 1.995 | 3.031 | UP |
| GPN3         | 0.702 | 0.723 | 1.111 | UP |
| FAM63B       | 1.07  | 1.109 | 1.717 | UP |
| ZNF34        | 0.928 | 0.962 | 1.496 | UP |
| RNF112       | 0.93  | 0.908 | 1.442 | UP |
| LOC100133180 | 2.07  | 2.089 | 3.269 | UP |
| PUM2         | 0.947 | 0.927 | 1.493 | UP |
| C7orf53      | 2.86  | 2.737 | 4.466 | UP |
| RNF160       | 1.078 | 1.039 | 1.687 | UP |
| GAD1         | 0.932 | 0.908 | 1.509 | UP |
| ZBTB1        | 0.826 | 0.913 | 1.356 | UP |
| RFPL3S       | 1.351 | 1.481 | 2.21  | UP |
| KLB          | 1.617 | 1.724 | 2.611 | UP |
| DNAJC3       | 0.698 | 0.756 | 1.119 | UP |
| SELT         | 0.697 | 0.751 | 1.102 | UP |
| KLHL24       | 0.737 | 0.801 | 1.217 | UP |
| DOT1L        | 0.962 | 1.04  | 1.607 | UP |
| ZGLP1        | 1.198 | 1.662 | 2.206 | UP |
| RC3H1        | 0.87  | 1.213 | 1.64  | UP |
| C5orf41      | 1.717 | 2.385 | 3.258 | UP |
| BIRC2        | 0.931 | 1.29  | 1.793 | UP |
| SGPP1        | 1.139 | 1.508 | 2.045 | UP |
| SCML2        | 1.29  | 1.67  | 2.284 | UP |
| LSM1         | 0.638 | 0.908 | 1.16  | UP |
| TCERG1       | 0.632 | 0.838 | 1.232 | UP |
| CPNE8        | 1.035 | 1.382 | 2.043 | UP |
| ZNF460       | 1.091 | 1.465 | 2.191 | UP |
| TNFRSF10B    | 1.224 | 1.616 | 2.38  | UP |
| PLK3         | 1.475 | 1.892 | 2.834 | UP |
| ZMYM2        | 0.604 | 0.814 | 1.152 | UP |
| TMEM184A     | 1.136 | 1.496 | 2.145 | UP |
| SFRS12IP1    | 0.965 | 1.256 | 1.81  | UP |
| HIST2H2AA4   | 0.718 | 0.955 | 1.366 | UP |
| SBDS         | 0.964 | 1.345 | 1.935 | UP |
| TCF7L2       | 0.797 | 1.125 | 1.587 | UP |
| MAG          | 0.711 | 0.989 | 1.385 | UP |
| IRAK2        | 1.713 | 2.469 | 3.575 | UP |
| RC3H2        | 0.683 | 0.757 | 1.053 | UP |
| JMJD1C       | 1.695 | 1.889 | 2.667 | UP |
| SLTM         | 0.891 | 1.032 | 1.437 | UP |
| EZH1         | 1.247 | 1.452 | 1.979 | UP |
| KAT2B        | 0.649 | 0.776 | 1.087 | UP |
| HCN3         | 1.661 | 1.959 | 2.756 | UP |
| FBXO36       | 1.04  | 1.234 | 1.743 | UP |
| CLDND1       | 1.048 | 1.255 | 1.751 | UP |
| CXADR        | 0.883 | 1.031 | 1.462 | UP |
| ARG2         | 0.813 | 0.928 | 1.327 | UP |
| PLAUR        | 0.864 | 0.993 | 1.449 | UP |
| BAZ2B        | 0.877 | 1.012 | 1.477 | UP |
| KCTD9        | 1.088 | 1.3   | 1.783 | UP |
| CENPQ        | 0.72  | 0.885 | 1.206 | UP |
| ZNF238       | 1.088 | 1.343 | 1.838 | UP |
| DDX10        | 1.203 | 1.505 | 2.109 | UP |
| CD274        | 2.59  | 3.238 | 4.609 | UP |
| DUSP5        | 1.026 | 1.317 | 1.861 | UP |
| EXOC8        | 0.584 | 0.708 | 1.035 | UP |
| DOHH         | 1.484 | 1.808 | 2.581 | UP |
| CPEB2        | 1.397 | 1.713 | 2.512 | UP |
| CNOT8        | 0.597 | 0.727 | 1.062 | UP |
| UPF3B        | 1.473 | 1.796 | 2.613 | UP |
| PIBF1        | 1.049 | 1.29  | 1.863 | UP |
| SLC39A7      | 0.625 | 0.761 | 1.123 | UP |
| MNT          | 0.881 | 1.048 | 1.556 | UP |
| DIAPH1       | 0.58  | 0.935 | 1.39  | UP |
| CCDC47       | 0.497 | 0.812 | 1.189 | UP |
| RASSF1       | 1.538 | 2.458 | 3.603 | UP |
| TNFRSF12A    | 1.512 | 2.478 | 3.594 | UP |
| PDGFB        | 1.628 | 2.626 | 3.752 | UP |
| VSTM2A       | 0.821 | 1.367 | 1.86  | UP |
| LAT          | 0.48  | 0.788 | 1.08  | UP |
| SLC16A1      | 0.594 | 1.013 | 1.391 | UP |
| E2F4         | 0.55  | 0.906 | 1.261 | UP |
| CXorf26      | 0.45  | 0.718 | 1.01  | UP |
| INPP1        | 0.558 | 0.978 | 1.396 | UP |
| CCDC28A      | 0.472 | 0.821 | 1.173 | UP |
| SNX16        | 0.639 | 1.087 | 1.542 | UP |
| MGC16703     | 0.918 | 1.595 | 2.251 | UP |
| E2F5         | 0.613 | 1.044 | 1.458 | UP |

|              |       |       |       |    |
|--------------|-------|-------|-------|----|
| PHC2         | 0.764 | 1.321 | 1.845 | UP |
| NEK7         | 0.923 | 1.648 | 2.284 | UP |
| GABARAPL1    | 1.223 | 2.192 | 3.029 | UP |
| CEP135       | 0.767 | 1.369 | 1.881 | UP |
| SERTAD4      | 1.307 | 2.23  | 3.243 | UP |
| PRKAB2       | 0.775 | 1.338 | 1.976 | UP |
| CCDC91       | 0.415 | 0.733 | 1.085 | UP |
| AREG         | 1.333 | 2.28  | 3.376 | UP |
| TMEM170A     | 0.425 | 0.71  | 1.057 | UP |
| RBM9         | 0.532 | 0.896 | 1.362 | UP |
| FSTL3        | 0.818 | 1.383 | 2.091 | UP |
| CAV1         | 0.386 | 0.664 | 1.013 | UP |
| STX1A        | 0.813 | 1.329 | 2.059 | UP |
| FAM3C        | 0.468 | 0.77  | 1.216 | UP |
| PTHLH        | 1.367 | 2.058 | 2.811 | UP |
| DOLPP1       | 0.613 | 0.918 | 1.258 | UP |
| ZNF550       | 0.839 | 1.277 | 1.775 | UP |
| PTX3         | 0.884 | 1.368 | 1.9   | UP |
| ARSJ         | 0.568 | 0.897 | 1.223 | UP |
| TAF9         | 0.634 | 1.001 | 1.388 | UP |
| NADK         | 0.516 | 0.788 | 1.099 | UP |
| C6orf145     | 1.068 | 1.623 | 2.266 | UP |
| WBP4         | 0.968 | 1.472 | 2.096 | UP |
| JUB          | 1.169 | 1.828 | 2.586 | UP |
| FKBP14       | 0.586 | 0.893 | 1.284 | UP |
| SH2D3A       | 0.695 | 1.031 | 1.544 | UP |
| KRR1         | 0.692 | 1.051 | 1.573 | UP |
| LRRFIP2      | 0.481 | 0.695 | 1.056 | UP |
| C3orf19      | 0.649 | 0.944 | 1.434 | UP |
| BDNF         | 0.665 | 0.977 | 1.468 | UP |
| ASH1L        | 0.556 | 0.83  | 1.254 | UP |
| UBIAD1       | 0.453 | 0.691 | 1.039 | UP |
| LOC642521    | 0.551 | 0.833 | 1.23  | UP |
| C1GALT1      | 1.057 | 1.557 | 2.302 | UP |
| SLC19A2      | 1.201 | 1.79  | 2.632 | UP |
| ZNF335       | 1.059 | 1.528 | 2.488 | UP |
| PRDM10       | 0.44  | 0.638 | 1.02  | UP |
| PLEKHM2      | 0.458 | 0.639 | 1.036 | UP |
| MITF         | 0.832 | 1.155 | 1.913 | UP |
| MKLN1        | 0.577 | 0.819 | 1.344 | UP |
| ELK4         | 0.503 | 0.735 | 1.208 | UP |
| SPAG1        | 0.427 | 0.619 | 1.026 | UP |
| SS18         | 0.792 | 1.105 | 1.841 | UP |
| SMCR8        | 0.595 | 0.824 | 1.367 | UP |
| TDG          | 0.868 | 1.263 | 2.091 | UP |
| PSMC3IP      | 0.693 | 1.047 | 1.728 | UP |
| MYST3        | 0.557 | 0.81  | 1.378 | UP |
| CFLAR        | 0.65  | 0.973 | 1.621 | UP |
| TNPO2        | 0.833 | 1.245 | 1.947 | UP |
| NUDCD1       | 0.495 | 0.734 | 1.128 | UP |
| CWC22        | 1.14  | 1.71  | 2.622 | UP |
| CRLF3        | 0.517 | 0.79  | 1.183 | UP |
| FAM161B      | 0.526 | 0.786 | 1.258 | UP |
| DMPK         | 0.795 | 1.189 | 1.86  | UP |
| C1D          | 0.43  | 0.659 | 1.037 | UP |
| ANKRD37      | 0.621 | 0.932 | 1.459 | UP |
| KIAA0182     | 0.656 | 0.942 | 1.496 | UP |
| GPATCH8      | 0.779 | 1.086 | 1.736 | UP |
| FEM1A        | 0.573 | 0.834 | 1.285 | UP |
| C16orf87     | 0.615 | 0.876 | 1.378 | UP |
| BAZ2A        | 0.451 | 0.715 | 1.141 | UP |
| ARHGAP19     | 1.103 | 1.682 | 2.706 | UP |
| S100A14      | 0.538 | 0.851 | 1.33  | UP |
| NKIRAS1      | 0.766 | 1.185 | 1.86  | UP |
| HLA-DQB1     | 0.42  | 0.653 | 1.012 | UP |
| RHBDF1       | 1.048 | 1.317 | 2.335 | UP |
| PPP4R2       | 0.649 | 0.815 | 1.425 | UP |
| LOC100132672 | 1.071 | 1.395 | 2.348 | UP |
| ARID4B       | 0.721 | 0.97  | 1.603 | UP |
| LIFR         | 0.671 | 0.912 | 1.672 | UP |
| FIZ1         | 0.421 | 0.59  | 1.063 | UP |
| RNF111       | 0.411 | 0.583 | 1.056 | UP |
| RUSC2        | 0.8   | 1.108 | 1.961 | UP |
| PAPOLG       | 0.758 | 1.097 | 1.927 | UP |
| IFNGR2       | 0.51  | 0.733 | 1.277 | UP |
| IER3         | 0.771 | 1.047 | 1.835 | UP |
| ARPP19       | 0.679 | 0.919 | 1.588 | UP |
| LOC389831    | 0.865 | 1.08  | 1.658 | UP |
| CHERP        | 0.523 | 0.675 | 1.029 | UP |
| ZC3H15       | 0.571 | 0.712 | 1.104 | UP |
| MORC3        | 1.309 | 1.611 | 2.468 | UP |
| FBXL3        | 0.73  | 0.892 | 1.394 | UP |
| EPHA2        | 1.702 | 2.118 | 3.311 | UP |
| DDX52        | 0.931 | 1.154 | 1.796 | UP |
| NCEH1        | 0.886 | 1.185 | 1.886 | UP |
| LCAT         | 1.968 | 2.684 | 4.313 | UP |
| SMAD3        | 0.54  | 0.733 | 1.176 | UP |
| STRN3        | 1.094 | 1.474 | 2.335 | UP |



|             |       |       |       |    |
|-------------|-------|-------|-------|----|
| LIF         | 1.273 | 1.709 | 2.691 | UP |
| RAB28       | 0.528 | 0.714 | 1.113 | UP |
| CLK1        | 1.018 | 1.41  | 2.151 | UP |
| YAP1        | 0.632 | 0.858 | 1.299 | UP |
| RBM24       | 1.134 | 1.552 | 2.364 | UP |
| TOP1        | 1.21  | 1.545 | 2.432 | UP |
| NUPL1       | 0.763 | 1.004 | 1.545 | UP |
| APOE        | 0.637 | 0.784 | 1.277 | UP |
| AKAP8L      | 0.956 | 1.168 | 1.91  | UP |
| SOC3        | 1.581 | 2.001 | 3.2   | UP |
| RPF2        | 0.645 | 0.795 | 1.304 | UP |
| GPR75       | 0.513 | 0.615 | 1.015 | UP |
| PDHX        | 0.59  | 0.749 | 1.231 | UP |
| DCP2        | 1.029 | 1.295 | 2.092 | UP |
| YPEL5       | 0.95  | 1.219 | 1.993 | UP |
| PAPD4       | 0.9   | 0.749 | 1.183 | UP |
| C1orf9      | 0.976 | 0.81  | 1.256 | UP |
| EEA1        | 1.272 | 1.032 | 1.681 | UP |
| ATL2        | 0.844 | 0.691 | 1.118 | UP |
| PKN2        | 0.922 | 0.796 | 1.225 | UP |
| UBR3        | 0.854 | 0.678 | 1.14  | UP |
| KLHL28      | 1.934 | 1.512 | 2.503 | UP |
| KIF18A      | 1.254 | 0.911 | 1.557 | UP |
| GCC2        | 0.847 | 0.639 | 1.05  | UP |
| TAC3        | 1.204 | 0.932 | 1.428 | UP |
| AGAP7       | 1.578 | 1.196 | 1.772 |    |
| OSBPL8      | 1.088 | 0.984 | 1.414 | UP |
| ETNK1       | 1.036 | 0.942 | 1.338 | UP |
| TBX19       | 1.325 | 1.224 | 1.725 | UP |
| THOC2       | 1.172 | 1.083 | 1.493 | UP |
| CEPT1       | 1.349 | 1.271 | 1.734 | UP |
| ZMYND11     | 0.862 | 0.782 | 1.083 | UP |
| TBC1D3B     | 0.992 | 0.868 | 1.278 | UP |
| MAGOH       | 1.373 | 1.189 | 1.744 | UP |
| TAX1BP1     | 0.821 | 0.712 | 1.008 | UP |
| THOC1       | 0.908 | 0.871 | 1.101 | UP |
| STIM2       | 1.032 | 0.973 | 1.255 | UP |
| TNFAIP6     | 1.307 | 1.245 | 1.587 | UP |
| ZNF92       | 1.01  | 0.985 | 1.296 | UP |
| KIF20B      | 1.194 | 1.121 | 1.493 | UP |
| KIAA1033    | 0.914 | 0.868 | 1.127 | UP |
| FNBP4       | 1.384 | 1.302 | 1.71  | UP |
| FAM105B     | 1.148 | 1.078 | 1.421 | UP |
| RUFY2       | 0.955 | 0.85  | 1.131 | UP |
| C21orf66    | 0.923 | 0.841 | 1.115 | UP |
| KIAA1731    | 1.119 | 0.918 | 1.291 | UP |
| C15orf29    | 1.425 | 1.171 | 1.645 | UP |
| PNPLA8      | 0.978 | 0.795 | 1.109 | UP |
| E2F8        | 1.289 | 1.109 | 1.463 | UP |
| AMH         | 1.169 | 1.03  | 1.345 | UP |
| ZNF224      | 1.482 | 1.27  | 1.724 | UP |
| ZBTB7A      | 0.961 | 0.815 | 1.112 | UP |
| DNAJC12     | 0.974 | 0.827 | 1.112 | UP |
| RP11-94I2.2 | 1.211 | 1.019 | 1.33  | UP |
| EFHA2       | 1.424 | 1.199 | 1.577 | UP |
| SLK         | 1.214 | 1.093 | 1.335 | UP |
| MAPK8       | 1.151 | 1.06  | 1.308 | UP |
| PRKAR2A     | 0.892 | 0.876 | 1.202 | UP |
| LOC642513   | 1.085 | 1.129 | 1.532 | UP |
| CHMP2B      | 0.894 | 0.923 | 1.253 | UP |
| MEP1A       | 0.729 | 0.762 | 1.004 | UP |
| RNF19B      | 1.193 | 1.201 | 1.715 | UP |
| CAPRIN2     | 1.562 | 1.55  | 2.215 | UP |
| ZNF341      | 1.789 | 1.818 | 2.543 | UP |
| ATP1B1      | 0.815 | 0.842 | 1.165 | UP |
| ADCY6       | 0.928 | 0.963 | 1.349 | UP |
| KIF21A      | 1.369 | 1.448 | 1.992 | UP |
| SUCLA2      | 0.912 | 0.834 | 1.246 | UP |
| PRPF39      | 1.756 | 1.666 | 2.484 | UP |
| MBP         | 0.78  | 0.75  | 1.081 | UP |
| NPR2        | 1.697 | 1.754 | 2.215 | UP |
| SMARCA1     | 0.971 | 0.978 | 1.271 | UP |
| NIPA1       | 1.14  | 1.164 | 1.525 | UP |
| SGOL2       | 1.05  | 0.797 | 1.529 | UP |
| AOC2        | 0.753 | 0.564 | 1.093 | UP |
| HIPK3       | 0.931 | 0.69  | 1.39  | UP |
| HIAT1       | 0.799 | 0.63  | 1.147 | UP |
| GLCC1       | 1.48  | 1.205 | 2.171 | UP |
| DRAM1       | 0.723 | 0.583 | 1.09  | UP |
| CCDC21      | 0.945 | 0.79  | 1.308 | UP |
| C20orf106   | 1.864 | 1.515 | 2.633 | UP |
| HMGB2       | 0.771 | 0.649 | 1.138 | UP |
| CP110       | 0.921 | 0.783 | 1.339 | UP |
| PJA2        | 0.748 | 0.554 | 1.013 | UP |
| PHF10       | 0.842 | 0.635 | 1.154 | UP |
| PRPF4B      | 0.839 | 0.768 | 1.354 | UP |
| NPIP        | 0.649 | 0.574 | 1.009 | UP |
| ARFIP1      | 0.795 | 0.72  | 1.232 | UP |

|              |       |       |       |    |
|--------------|-------|-------|-------|----|
| ZNF767       | 0.88  | 0.752 | 1.358 | UP |
| BDP1         | 1.203 | 1.045 | 1.868 | UP |
| BZW1         | 0.812 | 0.686 | 1.305 | UP |
| LOC389024    | 0.767 | 0.722 | 1.149 | UP |
| SATB2        | 1.273 | 1.185 | 1.962 | UP |
| ABAT         | 0.759 | 0.681 | 1.129 | UP |
| STK19        | 1.897 | 1.675 | 2.737 | UP |
| CDC2         | 0.931 | 0.837 | 1.355 | UP |
| LOC399959    | 1.622 | 2.597 | 2.707 | UP |
| GPR111       | 0.607 | 0.988 | 1.012 | UP |
| KLF12        | 0.825 | 1.268 | 1.33  | UP |
| CCAR1        | 0.769 | 1.191 | 1.251 | UP |
| LONRF3       | 1.438 | 2.198 | 2.299 | UP |
| VEGFA        | 1.455 | 2.282 | 2.465 | UP |
| GBP3         | 1.066 | 1.588 | 1.68  | UP |
| FAM72A       | 0.999 | 1.451 | 1.547 | UP |
| PMAIP1       | 1.204 | 1.741 | 1.88  | UP |
| COMMD10      | 0.907 | 1.29  | 1.424 | UP |
| ZFY          | 1.066 | 1.589 | 1.764 | UP |
| TNFRSF9      | 1.234 | 1.886 | 2.11  | UP |
| PYGO1        | 0.718 | 0.983 | 1.149 | UP |
| IL1RAP       | 1.897 | 2.639 | 3.003 | UP |
| FAM177A1     | 0.691 | 0.963 | 1.111 | UP |
| SLC35D1      | 1.219 | 1.708 | 1.939 | UP |
| VDR          | 1.075 | 1.539 | 1.75  | UP |
| LAMC1        | 0.801 | 1.165 | 1.317 | UP |
| SBF2         | 0.718 | 0.951 | 1.087 | UP |
| RRM2B        | 1.175 | 1.559 | 1.754 | UP |
| AMD1         | 1.262 | 1.691 | 1.928 | UP |
| EMP1         | 1.733 | 2.552 | 2.998 | UP |
| TMEM156      | 1.972 | 2.677 | 3.314 | UP |
| PHF5A        | 0.72  | 1.015 | 1.223 | UP |
| IDS          | 0.625 | 0.863 | 1.036 | UP |
| C2orf63      | 1.24  | 1.715 | 2.075 | UP |
| PKD2L2       | 0.952 | 1.351 | 1.666 | UP |
| SEMA3C       | 1.347 | 1.594 | 2.059 | UP |
| MAP3K2       | 0.868 | 1.027 | 1.327 | UP |
| CNOT6L       | 0.811 | 1.013 | 1.288 | UP |
| CHD1         | 0.963 | 1.167 | 1.491 | UP |
| ZFR          | 0.686 | 0.837 | 1.055 | UP |
| PPL          | 1.454 | 1.779 | 2.207 | UP |
| HOXA4        | 0.953 | 1.194 | 1.478 | UP |
| WBP5         | 0.692 | 0.848 | 1.105 | UP |
| TNFAIP2      | 1.268 | 1.523 | 2.028 | UP |
| REM2         | 2.712 | 3.295 | 4.322 | UP |
| LOC387763    | 3.528 | 4.336 | 5.671 | UP |
| MOBK1A       | 0.698 | 0.932 | 1.11  | UP |
| C12orf30     | 0.709 | 0.938 | 1.121 | UP |
| B3GALT1      | 0.811 | 1.035 | 1.227 | UP |
| THAP9        | 1.399 | 1.86  | 2.288 | UP |
| NEFM         | 1.034 | 1.341 | 1.675 | UP |
| CLK4         | 1.363 | 1.748 | 2.153 | UP |
| BIRC3        | 2.593 | 3.285 | 4.134 | UP |
| MAFK         | 1.302 | 1.668 | 2.226 | UP |
| SH3D20       | 0.738 | 0.939 | 1.226 | UP |
| YOD1         | 1.238 | 1.604 | 2.086 | UP |
| PDCD10       | 0.791 | 1.042 | 1.331 | UP |
| TMEM22       | 0.956 | 1.286 | 1.659 | UP |
| SLC38A2      | 1.505 | 1.69  | 2.176 | UP |
| MCL1         | 1.342 | 1.51  | 1.93  | UP |
| IQCB1        | 1.136 | 1.28  | 1.604 | UP |
| PHLDA1       | 1.115 | 1.228 | 1.654 | UP |
| ACER3        | 1.18  | 1.287 | 1.728 | UP |
| GJC2         | 1.273 | 1.525 | 1.834 | UP |
| FAM73B       | 0.855 | 1.026 | 1.247 | UP |
| LOC100128416 | 1.176 | 1.412 | 1.712 | UP |
| TROVE2       | 0.943 | 0.968 | 1.166 | UP |
| C3orf58      | 0.876 | 0.899 | 1.082 | UP |
| TMED1        | 1.15  | 1.147 | 1.445 | UP |
| TMED5        | 0.919 | 0.937 | 1.093 | UP |
| FAM135A      | 1.317 | 1.348 | 1.576 | UP |
| TMEM79       | 1.934 | 2.013 | 2.326 | UP |
| OSBP2        | 0.852 | 0.899 | 1.033 | UP |
| ADAM8        | 1.699 | 1.655 | 1.99  | UP |
| GKAP1        | 0.884 | 0.991 | 1.2   | UP |
| FOXP2        | 0.844 | 0.964 | 1.153 | UP |
| C16orf61     | 0.862 | 0.979 | 1.178 | UP |
| ATXN1        | 1.348 | 1.525 | 1.805 | UP |
| STC1         | 1.917 | 2.201 | 2.687 | UP |
| LOC157562    | 2.274 | 2.498 | 3.083 | UP |
| PTAR1        | 0.874 | 0.976 | 1.15  | UP |
| P2RY11       | 1.31  | 1.46  | 1.71  | UP |
| MORG1        | 0.822 | 0.895 | 1.072 | UP |
| FAM132A      | 2.02  | 2.229 | 2.655 | UP |
| PHF1         | 1.324 | 1.469 | 1.705 | UP |
| ESF1         | 1.121 | 1.236 | 1.42  | UP |
| ZNF146       | 1.33  | 1.447 | 1.676 | UP |
| MOSPD2       | 1.42  | 1.698 | 1.922 | UP |

|              |        |       |       |    |
|--------------|--------|-------|-------|----|
| LIX1L        | 0.99   | 1.182 | 1.314 | UP |
| TRIM23       | 1.446  | 1.772 | 1.946 | UP |
| COL12A1      | 0.775  | 0.952 | 1.097 | UP |
| C19orf61     | 2.143  | 2.683 | 3.082 | UP |
| LOC100286937 | 1.157  | 1.47  | 1.654 | UP |
| MMP14        | 0.866  | 1.058 | 1.208 | UP |
| IFRD1        | 1.888  | 2.324 | 2.669 | UP |
| UNC84B       | 1.562  | 1.921 | 2.242 | UP |
| HSPBAP1      | 0.983  | 1.245 | 1.363 | UP |
| CAV2         | 1.083  | 1.386 | 1.543 | UP |
| OSTM1        | 0.885  | 1.147 | 1.243 | UP |
| TTC33        | 1.176  | 1.474 | 1.557 | UP |
| SCG2         | 0.928  | 1.169 | 1.246 | UP |
| CA2          | 1.048  | 1.352 | 1.408 | UP |
| ATF1         | 0.928  | 1.223 | 1.27  | UP |
| QSOX2        | 1.096  | 1.427 | 1.488 | UP |
| F2R          | 0.753  | 0.973 | 1.044 | UP |
| CYCSP52      | 0.996  | 1.277 | 1.354 | UP |
| LOC100131209 | 1.974  | 2.545 | 2.685 | UP |
| CD55         | 1.014  | 1.302 | 1.345 | UP |
| SMOX         | 2.826  | 3.386 | 3.589 | UP |
| TMEM161B     | 0.853  | 0.984 | 1.019 | UP |
| RPGR         | 1.462  | 1.754 | 1.791 | UP |
| TMTC3        | 1.041  | 1.253 | 1.247 |    |
| LOC401218    | 0.901  | 1.122 | 1.097 |    |
| SLC25A37     | 1.228  | 1.452 | 1.423 |    |
| GUCA1B       | 2.223  | 2.58  | 2.597 | UP |
| LOC644717    | 0.778  | 1.187 | 1.141 |    |
| C13orf15     | 0.824  | 1.245 | 1.184 |    |
| RND3         | 1.073  | 1.583 | 1.543 |    |
| BCAR3        | 0.946  | 1.412 | 1.314 |    |
| MFSD8        | 0.793  | 1.224 | 1.211 |    |
| EIF1B        | 0.862  | 1.332 | 1.32  |    |
| DAAM1        | 2.439  | 3.625 | 3.665 | UP |
| C5orf32      | 0.775  | 1.159 | 1.154 |    |
| FAM82A1      | 1.334  | 1.848 | 1.851 | UP |
| CAB39L       | 1.351  | 1.882 | 1.907 | UP |
| LOC643037    | 0.761  | 1.023 | 1.064 | UP |
| LOC100130178 | 1.176  | 1.699 | 1.709 | UP |
| LETM2        | 1.699  | 2.412 | 2.489 | UP |
| POLR2K       | 0.708  | 1.138 | 1.093 |    |
| TMEM38B      | 0.909  | 1.47  | 1.355 |    |
| YIPF4        | 1.275  | 2.111 | 1.98  |    |
| C6orf72      | 0.641  | 1.095 | 0.999 |    |
| C9orf91      | 0.864  | 1.585 | 1.453 |    |
| PTS          | 0.656  | 1.088 | 1.051 |    |
| FAS          | 1.325  | 2.299 | 2.191 |    |
| CREM         | 0.651  | 1.164 | 1.131 | UP |
| FOXF2        | -0.363 | 1.411 | 1.641 |    |
| COTL1        | -0.227 | 0.823 | 1.055 |    |
| ZHX2         | -0.177 | 0.801 | 1.094 |    |
| LOC283454    | -0.237 | 1.065 | 1.521 |    |
| BTN2A2       | -0.208 | 1.12  | 1.646 |    |
| AKAP2        | -0.156 | 0.745 | 1.164 |    |
| SLC36A1      | -0.347 | 0.613 | 1.005 |    |
| MARVELD2     | -0.328 | 0.647 | 1.029 |    |
| SLC8A3       | -0.296 | 0.75  | 1.312 |    |
| EXOC2        | -0.277 | 0.697 | 1.142 |    |
| PGF          | -0.354 | 1.167 | 1.878 |    |
| LOC100131726 | -0.241 | 0.73  | 1.11  |    |
| LVRN         | -0.356 | 0.72  | 1.356 |    |
| LARS2        | -0.086 | 0.431 | 1.112 |    |
| HRH1         | -0.078 | 0.588 | 1.525 |    |
| KIAA1949     | -0.09  | 0.413 | 1.003 |    |
| B3GNT2       | -0.077 | 0.502 | 1.186 |    |
| FHL2         | -0.065 | 0.613 | 1.379 | UP |
| FAM171A1     | -0.057 | 0.583 | 1.337 | UP |
| ZNF274       | 0.004  | 0.707 | 1.571 | UP |
| WDR66        | -0.008 | 0.614 | 1.401 | UP |
| PGBD3        | -0.014 | 0.519 | 1.209 | UP |
| PHLDB3       | -0.046 | 0.876 | 1.9   | UP |
| FAM103A1     | 0.022  | 0.581 | 1.21  | UP |
| PCGF2        | -0.095 | 0.77  | 1.567 | UP |
| DUSP2        | -0.05  | 0.666 | 1.393 | UP |
| ATP1B4       | -0.048 | 0.51  | 1.041 | UP |
| OCLN         | -0.082 | 1.003 | 1.814 | UP |
| BRPF3        | -0.081 | 0.832 | 1.557 | UP |
| UPF1         | -0.105 | 0.95  | 1.83  | UP |
| PRDM8        | -0.103 | 0.831 | 1.445 |    |
| METRNL       | -0.178 | 1.42  | 2.522 |    |
| ZNF202       | -0.014 | 0.978 | 1.831 | UP |
| CDK5R1       | -0.019 | 0.599 | 1.108 | UP |
| PKP2         | -0.007 | 1.468 | 2.645 | UP |
| UBE2E2       | -0.003 | 0.578 | 1.123 | UP |
| RELA         | 0.005  | 0.537 | 1.036 | UP |
| GAN          | -0.043 | 0.877 | 1.726 | UP |
| TNRC6C       | -0.125 | 0.544 | 1.007 |    |
| CCDC50       | -0.131 | 0.613 | 1.169 |    |

|              |        |        |       |    |
|--------------|--------|--------|-------|----|
| ARHGAP10     | -0.112 | 0.5    | 1.01  |    |
| LOC400573    | -0.155 | 0.618  | 1.072 |    |
| INA          | -0.171 | 0.659  | 1.193 |    |
| HN1L         | -0.16  | 0.478  | 1.074 |    |
| EHD4         | -0.158 | 0.5    | 1.081 |    |
| OBFC2A       | -0.337 | 0.844  | 1.927 |    |
| LOC387647    | -0.255 | 0.611  | 1.428 |    |
| SLC8A2       | -0.34  | 0.784  | 1.595 |    |
| GFRA1        | -0.248 | 0.532  | 1.102 |    |
| TTY15        | -0.292 | 0.814  | 1.651 |    |
| TRAM2        | -0.203 | 0.6    | 1.156 |    |
| ZNF251       | -0.016 | 0.961  | 1.37  |    |
| LOC550112    | -0.028 | 1.197  | 1.668 |    |
| KRTAP21-1    | -0.011 | 0.829  | 1.176 |    |
| SLC5A12      | 0.029  | 1.656  | 2.437 |    |
| PEA15        | 0.084  | 1.689  | 2.339 |    |
| KRT80        | 0.021  | 1.128  | 1.567 |    |
| MPZL3        | -0.103 | 1.241  | 2.027 |    |
| C19orf76     | -0.067 | 0.702  | 1.135 |    |
| LOC100128813 | -0.074 | 1.037  | 1.748 |    |
| PLD6         | -0.061 | 1.326  | 2.161 |    |
| PGM5         | -0.019 | 1.002  | 1.654 | UP |
| CRYZL1       | -0.105 | 0.898  | 1.356 |    |
| MEG8         | -0.065 | 0.895  | 1.39  |    |
| ALDH1A3      | -0.055 | 0.74   | 1.125 |    |
| NCRNA00086   | -0.101 | 0.76   | 1.224 |    |
| TLE4         | 0.034  | 1.582  | 2.659 | UP |
| FOXJ2        | 0.01   | 1.015  | 1.639 | UP |
| TP53INP2     | 0.03   | 1.266  | 1.946 |    |
| CCK          | 0.026  | 0.659  | 1.043 | UP |
| VPS37C       | -0.368 | 0.488  | 1.153 |    |
| TNK1         | -0.33  | 0.45   | 1.065 |    |
| RRP12        | -0.327 | 0.491  | 1.256 |    |
| FJX1         | -0.386 | 0.534  | 1.496 |    |
| PINX1        | -0.332 | 0.35   | 1.037 |    |
| NFYB         | -0.369 | 0.456  | 1.246 |    |
| RIMS4        | -0.42  | 0.599  | 1.866 |    |
| SMAP2        | -0.262 | 0.336  | 1.113 |    |
| IL12A        | -0.269 | 0.319  | 1.128 |    |
| SAP18        | 0.303  | 0.07   | 1.025 |    |
| CFP          | 0.381  | 0.072  | 1.253 |    |
| PIP5K1A      | 0.338  | 0.048  | 1.172 |    |
| SYCE1        | 0.381  | 0.134  | 1.35  | UP |
| FOS          | 1.259  | 0.523  | 4.872 | UP |
| MTE2         | 0.281  | 0.083  | 1.093 | UP |
| CRY2         | 0.621  | 0.183  | 2.434 | UP |
| LOC728065    | 0.382  | 0.144  | 1.631 | UP |
| HIVEP2       | 0.355  | 0.103  | 1.857 | UP |
| C12orf67     | 0.212  | 0.038  | 1.044 | UP |
| LOC100129617 | 0.182  | 0.05   | 1.079 | UP |
| MAP3K7IP2    | 0.217  | 0.108  | 1.074 | UP |
| FAM108B1     | 0.256  | 0.129  | 1.331 | UP |
| ZUFSP        | 0.31   | 0.166  | 1.482 | UP |
| SGK1         | 0.472  | -0.009 | 1.276 |    |
| OR2D3        | 0.381  | 0.053  | 1.076 |    |
| SERTAD2      | 0.362  | 0.462  | 1.741 | UP |
| HOXB3        | 0.363  | 0.428  | 1.623 | UP |
| DKFZp451A211 | 0.268  | 0.286  | 1.2   | UP |
| RBBP5        | 0.301  | 0.383  | 1.566 | UP |
| FUBP3        | 0.281  | 0.355  | 1.482 | UP |
| RIMKLB       | 0.465  | 0.57   | 2.355 | UP |
| CNOT4        | 0.218  | 0.25   | 1.058 | UP |
| MYSM1        | 0.386  | 0.521  | 2.08  | UP |
| GORASP1      | 0.272  | 0.372  | 1.484 | UP |
| RLIM         | 0.323  | 0.427  | 1.657 | UP |
| PDE10A       | 0.285  | 0.34   | 1.52  | UP |
| BRIX1        | 0.192  | 0.262  | 1.129 | UP |
| PRPF38B      | 0.458  | 0.414  | 2.077 | UP |
| MURC         | 0.218  | 0.204  | 1.004 | UP |
| LOC387810    | 0.3    | 0.268  | 1.395 | UP |
| ZNF474       | 0.382  | 0.323  | 1.697 | UP |
| ATE1         | 0.239  | 0.19   | 1.034 | UP |
| C4orf29      | 0.319  | 0.266  | 1.344 | UP |
| KIFC1        | 0.293  | 0.311  | 1.468 | UP |
| SPRY2        | 0.251  | 0.167  | 1.272 | UP |
| FLJ42627     | 0.3    | 0.213  | 1.446 | UP |
| ZNF367       | 0.476  | 0.428  | 2.429 | UP |
| LOC100131176 | 0.27   | 0.24   | 1.4   | UP |
| KRT25        | 0.507  | 0.398  | 2.374 | UP |
| ACTA1        | 0.261  | 0.207  | 1.259 | UP |
| LOC727878    | 0.406  | 0.296  | 1.612 | UP |
| LOC100128460 | 0.279  | 0.19   | 1.069 | UP |
| SFRS11       | 0.384  | 0.253  | 1.471 | UP |
| RPS6KA6      | 0.351  | 0.254  | 1.397 | UP |
| RNMT         | 0.376  | 0.265  | 1.482 | UP |
| PTPRH        | 0.498  | 0.309  | 1.889 | UP |
| ARID3C       | 0.326  | 0.19   | 1.229 | UP |
| DNAJC27      | 0.28   | 0.179  | 1.105 | UP |

|              |       |       |       |    |
|--------------|-------|-------|-------|----|
| C21orf89     | 0.443 | 0.311 | 1.627 | UP |
| ASMT         | 0.925 | 0.645 | 3.419 | UP |
| SRGAP1       | 0.269 | 0.199 | 1.024 | UP |
| SON          | 0.401 | 0.293 | 1.446 | UP |
| NFKBID       | 0.716 | 0.401 | 2.854 | UP |
| ARHGAP23     | 0.415 | 0.237 | 1.699 | UP |
| TAF7         | 0.28  | 0.17  | 1.142 | UP |
| C17orf74     | 0.285 | 0.145 | 1.149 | UP |
| LOC729130    | 0.348 | 0.286 | 1.193 | UP |
| NRL          | 0.378 | 0.357 | 1.506 | UP |
| CLDN15       | 0.467 | 0.403 | 1.727 | UP |
| MLL          | 0.354 | 0.296 | 1.335 | UP |
| KIF2C        | 0.317 | 0.256 | 1.17  | UP |
| TSHZ2        | 0.595 | 0.511 | 1.494 | UP |
| GORAB        | 0.433 | 0.361 | 1.088 | UP |
| C2orf24      | 0.593 | 0.497 | 1.505 | UP |
| SASS6        | 0.607 | 0.527 | 1.653 | UP |
| MCAM         | 0.596 | 0.508 | 1.566 | UP |
| LIN7B        | 0.57  | 0.387 | 1.387 | UP |
| CASP3        | 0.694 | 0.478 | 1.691 | UP |
| C3orf71      | 0.428 | 0.304 | 1.051 | UP |
| DCUN1D2      | 0.575 | 0.438 | 1.47  | UP |
| UBR5         | 0.401 | 0.345 | 1.315 | UP |
| DCAF15       | 0.447 | 0.375 | 1.467 | UP |
| LEMD1        | 0.428 | 0.332 | 1.297 | UP |
| C7orf40      | 0.639 | 0.546 | 1.998 | UP |
| HELQ         | 0.571 | 0.45  | 1.57  | UP |
| FBXO11       | 0.404 | 0.338 | 1.133 | UP |
| STAT3        | 0.47  | 0.438 | 1.43  | UP |
| SEC24A       | 0.504 | 0.486 | 1.561 | UP |
| CCDC45       | 0.535 | 0.529 | 1.694 | UP |
| WEE1         | 0.663 | 0.581 | 1.957 | UP |
| STAM         | 0.642 | 0.578 | 1.84  | UP |
| SFRS12       | 0.549 | 0.516 | 1.557 | UP |
| SNX31        | 0.476 | 0.531 | 1.652 | UP |
| INTS6        | 0.568 | 0.652 | 2.002 | UP |
| FAM126A      | 0.305 | 0.36  | 1.093 | UP |
| FMR1         | 0.305 | 0.354 | 1.049 | UP |
| SELV         | 0.366 | 0.373 | 1.219 | UP |
| ERCC6        | 0.435 | 0.465 | 1.522 | UP |
| TET2         | 0.52  | 0.628 | 1.931 | UP |
| RRAD         | 0.643 | 0.801 | 2.451 | UP |
| FRK          | 0.361 | 0.439 | 1.415 | UP |
| ZBTB48       | 0.46  | 0.511 | 1.731 | UP |
| PPP2CA       | 0.345 | 0.399 | 1.345 | UP |
| EPB41L2      | 0.495 | 0.57  | 1.972 | UP |
| JMY          | 0.292 | 0.307 | 1.085 | UP |
| RNF103       | 0.315 | 0.332 | 1.255 | UP |
| OVGP1        | 0.656 | 0.73  | 2.646 | UP |
| MGC16142     | 0.448 | 0.492 | 1.826 | UP |
| CCNT1        | 0.495 | 0.525 | 1.986 | UP |
| SMNDC1       | 0.29  | 0.316 | 1.172 | UP |
| MAGEA12      | 0.248 | 0.312 | 1.077 | UP |
| EIF2C4       | 0.404 | 0.479 | 1.687 | UP |
| ABL1         | 0.353 | 0.172 | 1.147 | UP |
| AHRR         | 0.322 | 0.168 | 1.011 | UP |
| RSRC2        | 0.946 | 0.476 | 2.843 | UP |
| OAZ3         | 0.375 | 0.198 | 1.135 | UP |
| C16orf46     | 0.668 | 0.435 | 2.05  | UP |
| PITPNB       | 0.316 | 0.215 | 1.021 | UP |
| DNAJC2       | 0.322 | 0.213 | 1.048 | UP |
| ZNF389       | 0.485 | 0.314 | 1.633 | UP |
| USPL1        | 0.355 | 0.221 | 1.173 | UP |
| HCFC2        | 0.549 | 0.325 | 1.476 | UP |
| C8orf46      | 0.424 | 0.246 | 1.161 | UP |
| DUSP14       | 0.653 | 0.413 | 1.871 | UP |
| WWTR1        | 0.511 | 0.345 | 1.439 | UP |
| RBMS3        | 0.47  | 0.309 | 1.316 | UP |
| TLK1         | 0.376 | 0.13  | 1.021 |    |
| LOC100130465 | 0.381 | 0.121 | 1.069 |    |
| CRABP2       | 0.736 | 0.286 | 2.338 | UP |
| FAM90A1      | 0.572 | 0.271 | 1.178 |    |
| SGMS2        | 1.18  | 0.521 | 2.57  |    |
| NCRNA00174   | 0.62  | 0.265 | 1.348 |    |
| TEF          | 0.972 | 0.489 | 2.25  | UP |
| USP19        | 0.525 | 0.227 | 1.26  |    |
| CCNL2        | 0.81  | 0.37  | 2.032 | UP |
| TBC1D23      | 0.568 | 0.346 | 1.041 | UP |
| CLEC2A       | 0.656 | 0.348 | 1.097 |    |
| NARG1L       | 0.638 | 0.315 | 1.166 |    |
| GAS2L3       | 0.838 | 0.405 | 1.516 |    |
| PER1         | 2.221 | 1.522 | 4.681 | UP |
| UTP11L       | 0.537 | 0.369 | 1.158 | UP |
| CLEC3B       | 0.491 | 0.332 | 1.068 | UP |
| FRYL         | 0.499 | 0.312 | 1.034 | UP |
| BAZ1A        | 0.58  | 0.438 | 1.237 | UP |
| RPRD1B       | 0.769 | 0.544 | 1.558 | UP |
| CES4         | 0.836 | 0.586 | 1.721 | UP |

|              |       |       |       |    |
|--------------|-------|-------|-------|----|
| LOC100134372 | 0.598 | 0.489 | 1.406 | UP |
| ID4          | 1.034 | 0.827 | 2.381 | UP |
| ARID4A       | 0.687 | 0.556 | 1.592 | UP |
| ING1         | 0.708 | 0.595 | 1.58  | UP |
| NDC80        | 0.767 | 0.542 | 1.297 | UP |
| LMAN1        | 0.755 | 0.548 | 1.334 | UP |
| TBK1         | 0.647 | 0.435 | 1.197 | UP |
| PRKAR1A      | 0.867 | 0.574 | 1.509 | UP |
| NPHP3        | 0.654 | 0.443 | 1.17  | UP |
| REST         | 0.722 | 0.511 | 1.313 | UP |
| CXCL3        | 1.128 | 0.931 | 2.271 | UP |
| BAG4         | 0.591 | 0.493 | 1.187 | UP |
| GPR64        | 0.606 | 0.494 | 1.176 | UP |
| LOC100129652 | 0.517 | 0.397 | 1.003 | UP |
| ADAM17       | 0.718 | 0.566 | 1.428 | UP |
| FAM193B      | 1.58  | 1.167 | 3.097 | UP |
| CBFA2T2      | 0.582 | 0.519 | 1.059 | UP |
| ATAD2B       | 1.16  | 0.997 | 2.086 | UP |
| ZBTB2        | 1.15  | 1.02  | 2.135 | UP |
| REV1         | 1.196 | 1.002 | 2.179 | UP |
| GOLGA8F      | 0.819 | 0.707 | 1.491 | UP |
| SECISBP2L    | 0.991 | 0.813 | 1.806 | UP |
| ZNF451       | 0.598 | 0.504 | 1.142 | UP |
| PPP1R12A     | 0.57  | 0.501 | 1.111 | UP |
| CAB39        | 0.692 | 0.59  | 1.314 | UP |
| CDC37L1      | 0.799 | 0.716 | 1.553 | UP |
| ZNF484       | 1.417 | 1.225 | 2.811 | UP |
| CBFB         | 0.505 | 0.448 | 1.014 | UP |
| TGFB2        | 0.746 | 0.712 | 1.492 | UP |
| CDKN2D       | 0.908 | 0.848 | 1.853 | UP |
| ZCCHC10      | 0.546 | 0.556 | 1.13  | UP |
| FAM40A       | 0.522 | 0.532 | 1.055 | UP |
| LOC283663    | 1.666 | 1.575 | 3.01  | UP |
| CCDC13       | 0.612 | 0.578 | 1.094 | UP |
| SMARCA4      | 1.01  | 0.933 | 1.84  | UP |
| NR4A3        | 0.798 | 0.713 | 1.398 | UP |
| SCAPER       | 0.713 | 0.65  | 1.227 | UP |
| LOC100216546 | 0.939 | 0.881 | 1.619 | UP |
| STK17B       | 0.829 | 0.775 | 1.561 | UP |
| FAM160B1     | 0.895 | 0.826 | 1.686 | UP |
| SNHG1        | 0.932 | 0.912 | 1.771 | UP |
| H2BFWT       | 0.701 | 0.543 | 1.168 | UP |
| LOC144438    | 0.676 | 0.526 | 1.136 | UP |
| AVPI1        | 1.064 | 0.835 | 1.824 | UP |
| UBD          | 0.734 | 0.569 | 1.27  | UP |
| CIR1         | 1.151 | 0.914 | 1.886 | UP |
| PLEKHA7      | 0.508 | 0.654 | 1.228 | UP |
| NFAT5        | 0.997 | 1.262 | 2.42  | UP |
| KIAA0907     | 0.664 | 0.882 | 1.645 | UP |
| EDN2         | 1.473 | 1.918 | 3.649 | UP |
| ZNF330       | 0.445 | 0.572 | 1.084 | UP |
| ZEB1         | 0.76  | 0.967 | 1.821 | UP |
| SRFBP1       | 0.711 | 0.888 | 1.732 | UP |
| PPP3R1       | 0.552 | 0.681 | 1.305 | UP |
| PPTC7        | 0.782 | 0.982 | 1.833 | UP |
| DDX21        | 0.567 | 0.726 | 1.326 | UP |
| WDR20        | 0.943 | 1.1   | 2.118 | UP |
| EFNA1        | 1.126 | 1.345 | 2.532 | UP |
| ZNF639       | 0.737 | 0.873 | 1.705 | UP |
| LOC729806    | 0.521 | 0.616 | 1.198 | UP |
| CXCL1        | 1.273 | 1.533 | 2.989 | UP |
| ATP2A1       | 0.679 | 0.831 | 1.61  | UP |
| C14orf138    | 1.183 | 1.399 | 2.733 | UP |
| ADPGK        | 0.496 | 0.583 | 1.149 | UP |
| FAM91A1      | 0.896 | 0.99  | 2.068 | UP |
| AAGAB        | 0.689 | 0.757 | 1.572 | UP |
| TMEM81       | 0.655 | 0.701 | 1.5   | UP |
| TRAF2        | 0.659 | 0.725 | 1.49  | UP |
| PLK4         | 0.709 | 0.77  | 1.587 | UP |
| TMEFF1       | 0.641 | 0.711 | 1.415 | UP |
| REV3L        | 0.836 | 0.949 | 1.881 | UP |
| RBM5         | 0.647 | 0.712 | 1.41  | UP |
| SETD2        | 0.887 | 0.949 | 1.945 | UP |
| LOC100128727 | 0.866 | 0.898 | 1.865 | UP |
| NR4A2        | 0.63  | 0.7   | 1.261 | UP |
| GGA3         | 0.556 | 0.603 | 1.113 | UP |
| LIN52        | 1.086 | 1.245 | 2.229 | UP |
| CSNK1A1      | 0.504 | 0.581 | 1.032 | UP |
| THUMPD2      | 1.008 | 1.143 | 2.052 | UP |
| PANK4        | 0.617 | 0.73  | 1.262 | UP |
| SETD8        | 0.561 | 0.634 | 1.169 | UP |
| SENK7        | 0.76  | 0.863 | 1.577 | UP |
| RAGE         | 0.947 | 1.05  | 2.005 | UP |
| KDM3A        | 0.89  | 0.98  | 1.845 | UP |
| KLHL11       | 0.648 | 0.718 | 1.35  | UP |
| CRY1         | 1.307 | 1.498 | 2.776 | UP |
| TMC7         | 0.591 | 0.631 | 1.239 | UP |
| TBC1D15      | 1.012 | 1.109 | 2.145 | UP |

|              |       |       |       |    |
|--------------|-------|-------|-------|----|
| COL4A3BP     | 0.861 | 0.904 | 1.719 | UP |
| C1orf124     | 0.613 | 0.631 | 1.217 | UP |
| RGPD5        | 0.753 | 0.798 | 1.517 | UP |
| TERF2IP      | 1.237 | 1.307 | 2.401 | UP |
| LOC100129138 | 1.062 | 1.083 | 2.015 | UP |
| RSF1         | 0.801 | 0.783 | 1.991 | UP |
| TLR6         | 0.896 | 0.865 | 2.192 | UP |
| G2E3         | 0.824 | 0.779 | 1.954 | UP |
| RABGAP1      | 0.429 | 0.388 | 1.02  | UP |
| C6orf204     | 0.408 | 0.382 | 1.031 | UP |
| SNHG12       | 0.964 | 1.038 | 2.466 | UP |
| PPM1A        | 0.549 | 0.598 | 1.395 | UP |
| ERO1LB       | 0.735 | 0.772 | 1.852 | UP |
| CXCL2        | 0.848 | 0.903 | 2.162 | UP |
| USP12        | 0.74  | 0.784 | 1.904 | UP |
| RAB2B        | 0.452 | 0.465 | 1.127 | UP |
| TMEM41B      | 0.426 | 0.443 | 1.002 | UP |
| JUND         | 0.599 | 0.616 | 1.392 | UP |
| C9orf102     | 0.638 | 0.653 | 1.48  | UP |
| C11orf30     | 0.552 | 0.572 | 1.288 | UP |
| RGS2         | 0.769 | 0.745 | 1.793 | UP |
| OCLM         | 0.519 | 0.477 | 1.122 | UP |
| MBNL3        | 0.767 | 0.692 | 1.636 | UP |
| PHTF2        | 0.457 | 0.439 | 1.025 | UP |
| CSF2         | 1.676 | 1.638 | 3.723 | UP |
| HTR1D        | 0.515 | 0.502 | 1.111 | UP |
| TM2D3        | 0.386 | 0.478 | 1.035 | UP |
| SMC5         | 0.68  | 0.864 | 1.86  | UP |
| SLU7         | 0.476 | 0.597 | 1.28  | UP |
| PHLDA2       | 0.68  | 0.841 | 1.817 | UP |
| LOC728836    | 0.527 | 0.683 | 1.447 | UP |
| KBTBD2       | 0.621 | 0.83  | 1.733 | UP |
| TRIML2       | 0.917 | 1.185 | 2.513 | UP |
| ITSN2        | 0.477 | 0.578 | 1.305 | UP |
| ID2          | 0.921 | 1.126 | 2.486 | UP |
| ZNF654       | 0.947 | 1.151 | 2.542 | UP |
| ZBTB17       | 0.453 | 0.553 | 1.235 | UP |
| TAF2         | 0.389 | 0.455 | 1.038 | UP |
| TTL3         | 0.539 | 0.676 | 1.371 | UP |
| TMEM18       | 0.496 | 0.588 | 1.193 | UP |
| RIT1         | 1.192 | 1.315 | 2.866 | UP |
| MYNN         | 0.747 | 0.855 | 1.822 | UP |
| MED28        | 0.5   | 0.567 | 1.262 | UP |
| SMURF1       | 0.629 | 0.874 | 1.71  | UP |
| SCYL2        | 0.66  | 0.894 | 1.807 | UP |
| FBXO33       | 0.69  | 0.931 | 1.85  | UP |
| MAPKSP1      | 0.565 | 0.816 | 1.623 | UP |
| CYP27B1      | 0.612 | 0.87  | 1.706 | UP |
| LOC100132541 | 0.645 | 0.938 | 1.862 | UP |
| ARL13B       | 0.85  | 1.27  | 2.509 | UP |
| DGKE         | 0.369 | 0.54  | 1.026 | UP |
| DCP1A        | 0.758 | 1.158 | 2.149 | UP |
| PPP3CC       | 0.555 | 0.775 | 1.467 | UP |
| MSX1         | 0.418 | 0.631 | 1.536 | UP |
| FERMT2       | 0.703 | 1.022 | 2.478 | UP |
| WDR45L       | 0.373 | 0.563 | 1.341 | UP |
| NR1D1        | 1.22  | 1.819 | 4.271 | UP |
| KLK13        | 0.314 | 0.452 | 1.062 | UP |
| FNIP1        | 0.756 | 1.062 | 2.52  | UP |
| FBXO3        | 0.587 | 0.861 | 2.041 | UP |
| CARD9        | 0.39  | 0.55  | 1.325 | UP |
| GATA6        | 0.912 | 1.209 | 2.881 | UP |
| ARRDC2       | 0.534 | 0.7   | 1.67  | UP |
| RBM33        | 0.559 | 0.739 | 1.771 | UP |
| SIRT1        | 0.4   | 0.551 | 1.279 | UP |
| MAP2K3       | 0.852 | 1.188 | 2.812 | UP |
| NUP50        | 0.555 | 0.721 | 1.775 | UP |
| LOC100288600 | 0.477 | 0.614 | 1.489 | UP |
| IER2         | 0.78  | 1.149 | 2.516 | UP |
| GAPVD1       | 0.422 | 0.597 | 1.326 | UP |
| TSC1         | 0.545 | 0.756 | 1.705 | UP |
| PPP1R15B     | 0.526 | 0.738 | 1.635 | UP |
| ZBTB34       | 0.444 | 0.664 | 1.494 | UP |
| MCC          | 0.382 | 0.508 | 1.129 | UP |
| KDM5C        | 0.596 | 0.807 | 1.782 | UP |
| ZNF800       | 0.397 | 0.547 | 1.164 | UP |
| ZNF653       | 0.414 | 0.502 | 1.193 | UP |
| RYBP         | 0.64  | 0.782 | 1.841 | UP |
| FUT3         | 0.476 | 0.582 | 1.4   | UP |
| CCNC         | 0.369 | 0.446 | 1.071 | UP |
| MYLIP        | 0.544 | 0.691 | 1.57  | UP |
| ADH7         | 0.698 | 0.863 | 1.982 | UP |
| SYDE2        | 0.812 | 1.039 | 2.318 | UP |
| FIGN         | 0.705 | 0.826 | 2.021 | UP |
| C2orf69      | 0.361 | 0.416 | 1.049 | UP |
| AMMECR1L     | 0.464 | 0.545 | 1.359 | UP |
| MARCH7       | 0.565 | 0.662 | 1.678 | UP |
| UBE2H        | 0.39  | 0.463 | 1.144 | UP |

|              |       |       |       |    |
|--------------|-------|-------|-------|----|
| PPIL4        | 0.344 | 0.405 | 1.029 | UP |
| GOLGA2       | 0.591 | 0.661 | 1.608 | UP |
| GCH1         | 0.412 | 0.478 | 1.136 | UP |
| SMPD1        | 0.592 | 0.66  | 1.611 | UP |
| QKI          | 0.607 | 0.704 | 1.676 | UP |
| ODF2         | 0.457 | 0.521 | 1.259 | UP |
| IL6ST        | 0.492 | 0.534 | 1.402 | UP |
| FRS2         | 0.409 | 0.417 | 1.127 | UP |
| NCRNA00160   | 0.41  | 0.444 | 1.258 | UP |
| DSCR9        | 0.379 | 0.423 | 1.161 | UP |
| NGFR         | 0.502 | 0.525 | 1.49  | UP |
| SLC16A7      | 0.354 | 0.408 | 1.1   | UP |
| RFX1         | 0.514 | 0.573 | 1.597 | UP |
| PPAP2B       | 0.598 | 0.64  | 1.871 | UP |
| LOC256880    | 0.326 | 0.359 | 1.058 | UP |
| PRH2         | 0.427 | 0.5   | 1.327 | UP |
| CDKN2AIP     | 0.816 | 0.967 | 2.525 | UP |
| WAC          | 0.449 | 0.524 | 1.365 | UP |
| SPAG9        | 0.583 | 0.742 | 1.903 | UP |
| NBR1         | 0.315 | 0.379 | 1.048 | UP |
| FBXW7        | 0.595 | 0.736 | 2.009 | UP |
| TOLLIP       | 0.24  | 1.067 | 1.688 | UP |
| TMEM194B     | 0.192 | 0.854 | 1.357 | UP |
| ST7L         | 0.157 | 0.642 | 1.017 | UP |
| TCF12        | 0.164 | 0.736 | 1.205 | UP |
| CYTH3        | 0.178 | 0.788 | 1.29  | UP |
| PPP1R1C      | 0.342 | 1.304 | 2.117 | UP |
| NKX3-1       | 0.179 | 0.713 | 1.165 | UP |
| ZNF776       | 0.35  | 1.292 | 2.13  | UP |
| RAPGEF6      | 0.21  | 0.705 | 1.162 | UP |
| ARL8B        | 0.294 | 1.011 | 1.661 | UP |
| UPF2         | 0.216 | 0.736 | 1.292 | UP |
| SLC30A7      | 0.247 | 0.836 | 1.487 | UP |
| CBL          | 0.241 | 0.851 | 1.537 | UP |
| BTBD10       | 0.309 | 1.184 | 2.108 | UP |
| MRPL42P5     | 0.313 | 1.227 | 2.143 | UP |
| RARA         | 0.183 | 0.62  | 1.05  | UP |
| PPP2CB       | 0.234 | 0.804 | 1.394 | UP |
| ZNF136       | 0.457 | 1.635 | 2.762 | UP |
| C1orf69      | 0.483 | 1.838 | 3.114 | UP |
| RFX6         | 0.217 | 0.919 | 1.705 | UP |
| SLC31A2      | 0.14  | 0.645 | 1.159 | UP |
| LOC100133659 | 0.141 | 0.664 | 1.187 | UP |
| KCTD5        | 0.223 | 1.009 | 1.817 | UP |
| STAM2        | 0.121 | 0.625 | 1.112 | UP |
| CAPN6        | 0.114 | 0.616 | 1.065 | UP |
| M6PR         | 0.115 | 0.62  | 1.13  | UP |
| TNSI         | 0.184 | 0.753 | 1.472 | UP |
| PPP1R13L     | 0.347 | 1.413 | 2.737 | UP |
| SHOC2        | 0.213 | 0.713 | 1.353 | UP |
| FOSL1        | 0.68  | 2.255 | 4.329 | UP |
| LIG4         | 0.238 | 0.789 | 1.459 | UP |
| SCN3B        | 0.228 | 0.856 | 1.6   | UP |
| MAP4K3       | 0.252 | 0.895 | 1.681 | UP |
| CHIC2        | 0.315 | 1.196 | 2.251 | UP |
| SEMA7A       | 0.079 | 0.783 | 1.163 | UP |
| OR7E104P     | 0.073 | 0.67  | 1.013 | UP |
| SRF          | 0.103 | 1.588 | 2.382 |    |
| ZNF75A       | 0.077 | 0.852 | 1.218 |    |
| TSPAN5       | 0.098 | 1.339 | 1.947 |    |
| PLA2G4C      | 0.312 | 2.349 | 3.41  | UP |
| FUNDC2       | 0.132 | 1.014 | 1.458 | UP |
| TRIM38       | 0.081 | 0.929 | 1.466 | UP |
| OLFM2        | 0.146 | 1.339 | 2.222 | UP |
| HCCS         | 0.095 | 0.658 | 1.033 | UP |
| FAM168B      | 0.149 | 1.009 | 1.561 | UP |
| ZNF407       | 0.156 | 1.123 | 1.754 | UP |
| ZNF697       | 0.237 | 1.507 | 2.411 | UP |
| TMEM88       | 0.225 | 1.497 | 2.25  | UP |
| ADAMTS16     | 0.109 | 0.702 | 1.052 | UP |
| ZNF276       | 0.112 | 0.768 | 1.169 | UP |
| SYS1         | 0.149 | 0.785 | 1.274 | UP |
| LOC100291714 | 0.113 | 0.642 | 1.012 | UP |
| GOT1         | 0.145 | 0.757 | 1.214 | UP |
| STX3         | 0.403 | 2.316 | 3.892 | UP |
| GMEB1        | 0.207 | 0.835 | 1.231 | UP |
| ADRB2        | 0.494 | 2.038 | 2.976 | UP |
| IL32         | 0.542 | 2.015 | 2.901 | UP |
| HRK          | 0.387 | 1.808 | 2.596 | UP |
| ARHGEF15     | 0.23  | 1.1   | 1.522 | UP |
| VWCE         | 0.174 | 0.917 | 1.329 | UP |
| PFKFB4       | 0.314 | 1.788 | 2.612 | UP |
| TNFRSF10C    | 0.243 | 1.142 | 1.725 | UP |
| MAP1LC3A     | 0.231 | 0.785 | 1.08  | UP |
| CLUU1OS      | 0.229 | 0.774 | 1.034 | UP |
| MYO5B        | 0.329 | 1.203 | 1.633 | UP |
| ADRB1        | 0.317 | 1.226 | 1.679 | UP |
| MAP1LC3B     | 0.389 | 1.409 | 1.871 | UP |



|           |       |       |       |    |
|-----------|-------|-------|-------|----|
| ZIC2      | 0.246 | 0.986 | 1.357 | UP |
| CCDC29    | 0.392 | 1.642 | 2.225 | UP |
| MED10     | 0.333 | 1.552 | 2.034 | UP |
| CDC42EP1  | 0.341 | 1.478 | 1.893 | UP |
| PHLDA3    | 0.214 | 0.799 | 1.223 | UP |
| AIFM2     | 0.186 | 0.666 | 1.054 | UP |
| RAB32     | 0.228 | 0.772 | 1.177 | UP |
| C11orf68  | 0.203 | 0.701 | 1.076 | UP |
| ITGA5     | 0.286 | 0.961 | 1.431 | UP |
| TAF1A     | 0.518 | 1.643 | 2.664 | UP |
| HAS2      | 0.647 | 2.071 | 3.269 | UP |
| FLJ31813  | 0.226 | 0.732 | 1.176 | UP |
| NECAP1    | 0.404 | 1.201 | 1.875 | UP |
| EHD1      | 0.442 | 1.27  | 1.921 | UP |
| ARID3A    | 0.49  | 1.539 | 2.317 | UP |
| TMEM27    | 0.542 | 1.614 | 2.354 | UP |
| UGCG      | 1.035 | 1.937 | 3.702 | UP |
| SPEN      | 0.431 | 0.799 | 1.557 | UP |
| GEM       | 0.965 | 1.832 | 3.515 | UP |
| FGFR1OP   | 0.577 | 1.081 | 2.115 | UP |
| RBM18     | 0.283 | 0.558 | 1.035 | UP |
| NR1D2     | 0.624 | 1.226 | 2.289 | UP |
| FAM83G    | 0.587 | 1.183 | 2.214 | UP |
| BTN2A1    | 0.551 | 1.084 | 2.078 | UP |
| ZFP36L1   | 0.383 | 0.75  | 1.466 | UP |
| THAP1     | 0.571 | 1.164 | 2.244 | UP |
| LATS2     | 0.585 | 1.215 | 2.378 | UP |
| CHD7      | 0.398 | 0.845 | 1.63  | UP |
| ZNF529    | 0.584 | 1.151 | 2.294 | UP |
| TXNL4B    | 0.87  | 1.685 | 3.323 | UP |
| SMN1      | 0.297 | 0.64  | 1.197 | UP |
| NUDCD3    | 0.342 | 0.724 | 1.365 | UP |
| SBNO2     | 0.272 | 0.635 | 1.183 | UP |
| BACH1     | 0.365 | 0.816 | 1.539 | UP |
| NFKBIB    | 0.894 | 1.575 | 2.828 | UP |
| CTDSPL2   | 0.419 | 0.754 | 1.355 | UP |
| TUBA4A    | 0.811 | 1.394 | 2.503 | UP |
| RRAS2     | 0.562 | 0.991 | 1.806 | UP |
| PDPK1     | 0.476 | 0.815 | 1.495 | UP |
| TICAM1    | 0.776 | 1.446 | 2.575 | UP |
| TBX2      | 0.588 | 1.091 | 1.968 | UP |
| HOXC13    | 0.506 | 0.941 | 1.678 | UP |
| BNC1      | 0.58  | 1.107 | 1.966 | UP |
| LOC145814 | 0.464 | 0.855 | 1.472 | UP |
| JUNB      | 0.843 | 1.574 | 2.75  | UP |
| UBTD1     | 0.346 | 0.631 | 1.105 | UP |
| FAF2      | 0.336 | 0.621 | 1.072 | UP |
| ACSL4     | 0.484 | 0.853 | 1.5   | UP |
| PARD6B    | 0.44  | 0.795 | 1.361 | UP |
| SPRY4     | 0.465 | 0.909 | 1.554 | UP |
| POLH      | 0.358 | 0.671 | 1.161 | UP |
| MEX3C     | 0.307 | 0.591 | 1.007 | UP |
| DUSP1     | 0.762 | 1.499 | 2.521 | UP |
| KLF7      | 0.373 | 0.709 | 1.301 | UP |
| KCNF1     | 0.512 | 1.015 | 1.824 | UP |
| TAF13     | 0.507 | 0.999 | 1.822 | UP |
| PI4KAP2   | 0.325 | 0.626 | 1.137 | UP |
| PI4K2A    | 0.686 | 1.369 | 2.487 | UP |
| SNX9      | 0.713 | 1.141 | 2.18  | UP |
| SFXN1     | 0.354 | 0.593 | 1.124 | UP |
| MAFF      | 1.623 | 2.708 | 5.074 | UP |
| LOC286109 | 0.788 | 1.267 | 2.365 | UP |
| ZNF143    | 0.841 | 1.372 | 2.518 | UP |
| RIOK3     | 0.682 | 1.072 | 2.125 | UP |
| CDK6      | 0.556 | 0.888 | 1.724 | UP |
| TGM2      | 0.532 | 0.829 | 1.623 | UP |
| DNAJB9    | 0.398 | 0.629 | 1.266 | UP |
| CLCF1     | 0.947 | 1.463 | 2.935 | UP |
| MXD1      | 1.043 | 1.778 | 3.48  | UP |
| MTX3      | 0.612 | 1.055 | 2.084 | UP |
| PTRH2     | 0.37  | 0.625 | 1.258 | UP |
| CASBP     | 0.419 | 0.739 | 1.468 | UP |
| ATG12     | 0.573 | 1.028 | 1.986 | UP |
| VKORC1L1  | 0.352 | 0.636 | 1.256 | UP |
| COQ10B    | 0.611 | 1.042 | 2.027 | UP |
| CCNJ      | 0.401 | 0.672 | 1.294 | UP |
| PCTK2     | 0.577 | 1.03  | 1.944 | UP |
| NOC3L     | 0.487 | 0.871 | 1.681 | UP |
| JAZF1     | 0.699 | 1.258 | 2.376 | UP |
| DUSP6     | 0.674 | 1.178 | 2.285 | UP |
| ZNF383    | 0.47  | 0.86  | 1.632 | UP |
| PRDM1     | 0.769 | 1.168 | 2.493 | UP |
| LDLRAD3   | 0.354 | 0.548 | 1.156 | UP |
| ZCCHC8    | 0.387 | 0.628 | 1.339 | UP |
| TFAM      | 0.522 | 0.848 | 1.777 | UP |
| SBSN      | 0.967 | 1.557 | 3.296 | UP |
| PRR4      | 0.383 | 0.606 | 1.263 | UP |
| ZNF267    | 0.51  | 0.838 | 1.76  | UP |

|               |       |       |       |    |
|---------------|-------|-------|-------|----|
| PAN3          | 0.428 | 0.688 | 1.553 | UP |
| TRAF4         | 0.265 | 0.443 | 1.003 | UP |
| GTPBP1        | 0.518 | 0.873 | 1.925 | UP |
| DKFZp667E0512 | 0.326 | 0.527 | 1.138 | UP |
| CSRNPI        | 1     | 1.618 | 3.585 | UP |
| SSH1          | 0.599 | 1.16  | 2.412 | UP |
| OMP           | 0.283 | 0.553 | 1.135 | UP |
| TOPORS        | 0.345 | 0.613 | 1.28  | UP |
| PPPIR15A      | 1.42  | 2.617 | 5.596 | UP |
| BRSK1         | 0.288 | 0.662 | 1.104 | UP |
| AEN           | 0.963 | 2.233 | 3.649 | UP |
| PRKAB1        | 0.586 | 1.353 | 2.283 | UP |
| LOC652636     | 0.273 | 0.631 | 1.036 | UP |
| CDC42SE1      | 0.594 | 1.39  | 2.29  | UP |
| ZRANB1        | 0.479 | 1.169 | 1.936 | UP |
| FRMD6         | 0.817 | 2.022 | 3.394 | UP |
| ZNF212        | 0.353 | 0.739 | 1.254 | UP |
| MAP3K14       | 0.966 | 2.121 | 3.57  | UP |
| LEMD2         | 0.416 | 0.892 | 1.529 | UP |
| AMHR2         | 0.446 | 1.003 | 1.713 | UP |
| VSTM1         | 0.376 | 0.89  | 1.422 | UP |
| SMAD7         | 0.399 | 0.903 | 1.454 | UP |
| OTUD7B        | 0.361 | 0.909 | 1.46  | UP |
| NRAS          | 0.362 | 0.936 | 1.515 | UP |
| IL11          | 0.808 | 2.1   | 3.363 | UP |
| C6orf150      | 0.319 | 0.837 | 1.341 | UP |
| PAX5          | 0.326 | 0.831 | 1.342 | UP |
| EIF2C3        | 0.254 | 0.579 | 1.029 | UP |
| C13orf1       | 0.259 | 0.602 | 1.08  | UP |
| PIM3          | 0.587 | 1.404 | 2.453 | UP |
| RAP2C         | 0.376 | 0.809 | 1.459 | UP |
| LRRC8C        | 0.674 | 1.52  | 2.696 | UP |
| IGF2BP2       | 0.599 | 1.488 | 2.684 | UP |
| DSCR3         | 0.32  | 0.84  | 1.5   | UP |
| PEX13         | 0.352 | 0.896 | 1.587 | UP |
| NARG1         | 0.293 | 0.854 | 1.424 | UP |
| ARRDC4        | 0.695 | 1.897 | 3.197 | UP |
| ZEB2          | 0.434 | 1.32  | 2.197 | UP |
| ZNF674        | 0.392 | 1.078 | 1.888 | UP |
| PLIN3         | 0.215 | 0.59  | 1.047 | UP |
| ZCCHC6        | 0.442 | 1.272 | 2.2   | UP |
| ORAOV1        | 0.386 | 1.159 | 1.958 | UP |
| RNF182        | 0.322 | 0.79  | 1.636 | UP |
| FAM66D        | 0.228 | 0.559 | 1.157 | UP |
| SLC41A2       | 0.243 | 0.624 | 1.236 | UP |
| RSBN1         | 0.249 | 0.615 | 1.243 | UP |
| PGM5P1        | 0.622 | 1.579 | 3.061 | UP |
| FGD4          | 0.435 | 1.073 | 2.133 | UP |
| VWC2L         | 0.262 | 0.649 | 1.299 | UP |
| KLF4          | 0.788 | 2.268 | 4.175 | UP |
| GJB3          | 0.487 | 1.382 | 2.526 | UP |
| GAR1          | 0.236 | 0.684 | 1.247 | UP |
| ARID1A        | 0.253 | 0.733 | 1.388 | UP |
| PCF11         | 0.333 | 0.866 | 1.595 | UP |
| CCNH          | 0.421 | 1.083 | 2.026 | UP |
| POGZ          | 0.251 | 0.634 | 1.199 | UP |
| TMEM194A      | 0.442 | 0.848 | 1.282 | UP |
| NCRNA00152    | 0.725 | 1.402 | 2.085 | UP |
| MFAP3         | 0.475 | 0.92  | 1.416 | UP |
| DDX3X         | 0.398 | 0.745 | 1.166 | UP |
| MRPL49        | 0.496 | 0.933 | 1.419 | UP |
| JUN           | 1.205 | 2.221 | 3.334 | UP |
| IL27RA        | 0.586 | 1.06  | 1.594 | UP |
| DHX35         | 0.403 | 0.737 | 1.109 | UP |
| UBE2S         | 0.469 | 0.959 | 1.482 | UP |
| LYST          | 0.95  | 1.873 | 2.896 | UP |
| RELB          | 0.879 | 1.832 | 2.787 | UP |
| LOC652191     | 0.678 | 1.391 | 2.088 | UP |
| LRRC8A        | 0.622 | 1.284 | 2.033 | UP |
| BNIP1         | 0.437 | 0.901 | 1.441 | UP |
| SHB           | 0.366 | 0.713 | 1.167 | UP |
| MED15         | 0.425 | 0.837 | 1.353 | UP |
| TNRC6A        | 0.383 | 0.738 | 1.181 | UP |
| UBE2W         | 0.514 | 1.034 | 1.679 | UP |
| TUBA3C        | 0.76  | 1.476 | 2.439 | UP |
| KIAA1688      | 0.286 | 0.604 | 1.001 | UP |
| AMOTL2        | 0.682 | 1.419 | 2.32  | UP |
| TUBA8         | 0.729 | 1.51  | 2.467 | UP |
| YES1          | 0.395 | 0.634 | 1.133 | UP |
| OXTR          | 1.134 | 1.807 | 3.14  | UP |
| NFKB2         | 1.141 | 1.752 | 3.138 | UP |
| MIER1         | 0.529 | 0.844 | 1.489 | UP |
| ORAI1         | 0.539 | 0.824 | 1.444 | UP |
| CTGF          | 1.132 | 1.677 | 2.947 | UP |
| DDIT3         | 1.669 | 2.789 | 4.907 | UP |
| BTG3          | 0.471 | 0.803 | 1.382 | UP |
| TES           | 0.472 | 0.804 | 1.411 | UP |
| NEU1          | 0.516 | 0.875 | 1.566 | UP |

|              |       |       |       |    |
|--------------|-------|-------|-------|----|
| EGFR         | 0.693 | 1.155 | 2.031 | UP |
| TNNC2        | 0.741 | 1.244 | 2.151 | UP |
| GNAQ         | 0.571 | 0.978 | 1.655 | UP |
| HERC4        | 0.395 | 0.611 | 1.015 | UP |
| AVL9         | 0.528 | 0.831 | 1.391 | UP |
| MTO1         | 0.596 | 0.936 | 1.544 | UP |
| RBBP6        | 0.906 | 1.489 | 2.453 | UP |
| ABCE1        | 0.472 | 0.767 | 1.296 | UP |
| RAB3GAP1     | 0.414 | 0.692 | 1.121 | UP |
| ZNF498       | 0.209 | 0.322 | 1.116 | UP |
| KLHL18       | 0.299 | 0.459 | 1.592 | UP |
| TAF5         | 0.351 | 0.548 | 1.969 | UP |
| HTR1A        | 0.391 | 0.579 | 2.12  | UP |
| WBP11        | 0.178 | 0.308 | 1.074 | UP |
| FRG2         | 0.174 | 0.295 | 1.014 | UP |
| PAK1IP1      | 0.249 | 0.42  | 1.519 | UP |
| DUSP10       | 0.67  | 0.942 | 3.117 | UP |
| BCL10        | 0.426 | 0.62  | 2.007 | UP |
| CCNL1        | 0.667 | 0.91  | 3.082 | UP |
| ZFX          | 0.292 | 0.426 | 1.444 | UP |
| DDAH1        | 0.312 | 0.431 | 1.507 | UP |
| TBC1D10A     | 0.306 | 0.466 | 1.499 | UP |
| SPTY2D1      | 0.261 | 0.417 | 1.334 | UP |
| KDM5D        | 0.31  | 0.517 | 1.631 | UP |
| ELF1         | 0.23  | 0.41  | 1.259 | UP |
| SOCS2        | 0.34  | 0.622 | 1.918 | UP |
| SCRN1        | 0.312 | 0.515 | 1.567 | UP |
| EXOC3L2      | 0.765 | 1.33  | 4.344 | UP |
| CLK3         | 0.179 | 0.329 | 1.041 | UP |
| IL6R         | 0.343 | 0.525 | 1.545 | UP |
| C11orf82     | 0.359 | 0.54  | 1.625 | UP |
| C3orf35      | 0.486 | 0.756 | 2.115 | UP |
| BLZF1        | 0.455 | 0.692 | 1.995 | UP |
| TSC22D2      | 0.517 | 0.754 | 2.334 | UP |
| KIAA1432     | 0.28  | 0.393 | 1.223 | UP |
| CYLD         | 0.468 | 0.631 | 1.963 | UP |
| LOC100127955 | 0.508 | 1.056 | 3.11  | UP |
| IL1A         | 0.284 | 0.627 | 1.85  | UP |
| PXN          | 0.258 | 0.589 | 1.771 | UP |
| BTN2A3       | 0.178 | 0.41  | 1.153 | UP |
| ARC          | 0.781 | 1.692 | 4.797 | UP |
| DSC2         | 0.211 | 0.498 | 1.42  | UP |
| RSC1A1       | 0.45  | 0.896 | 2.731 | UP |
| PICALM       | 0.227 | 0.444 | 1.325 | UP |
| RAB5A        | 0.175 | 0.372 | 1.139 | UP |
| KIAA0895     | 0.37  | 0.758 | 2.37  | UP |
| ZBTB6        | 0.322 | 0.587 | 1.636 | UP |
| LATS1        | 0.356 | 0.647 | 1.835 | UP |
| IP6K2        | 0.405 | 0.774 | 2.19  | UP |
| ICAM1        | 0.273 | 0.497 | 1.391 | UP |
| HBEGF        | 0.861 | 1.584 | 4.445 | UP |
| FAM126B      | 0.484 | 0.949 | 2.593 | UP |
| DYSFIP1      | 0.195 | 0.397 | 1.101 | UP |
| CRAMP1L      | 0.211 | 0.43  | 1.187 | UP |
| IPPK         | 0.296 | 0.729 | 1.886 | UP |
| C10orf12     | 0.321 | 0.77  | 1.973 | UP |
| RNF24        | 0.221 | 0.538 | 1.386 | UP |
| NPC1L1       | 0.195 | 0.501 | 1.291 | UP |
| EIF2C2       | 0.233 | 0.532 | 1.433 | UP |
| SLC25A25     | 0.278 | 0.656 | 1.616 | UP |
| LRRCS7       | 0.236 | 0.54  | 1.322 | UP |
| FXR2         | 0.295 | 0.677 | 1.68  | UP |
| LOC645978    | 0.681 | 1.463 | 3.058 | UP |
| CUGBP1       | 0.273 | 0.551 | 1.165 | UP |
| ARL8A        | 0.244 | 0.512 | 1.09  | UP |
| ZSWIM4       | 0.465 | 0.932 | 2.014 | UP |
| YRDC         | 0.628 | 1.204 | 2.674 | UP |
| TUFT1        | 0.537 | 1.072 | 2.388 | UP |
| GRM4         | 0.233 | 0.519 | 1.122 | UP |
| C1orf128     | 0.374 | 0.882 | 1.908 | UP |
| C3orf52      | 1.048 | 2.263 | 4.964 | UP |
| MSL2         | 0.286 | 0.623 | 1.464 | UP |
| MIER3        | 0.342 | 0.711 | 1.718 | UP |
| HIST1H2AE    | 0.248 | 0.512 | 1.188 | UP |
| ELOVL7       | 0.356 | 0.748 | 1.708 | UP |
| PDE12        | 0.404 | 0.855 | 1.994 | UP |
| GATA3        | 0.346 | 0.694 | 1.622 | UP |
| EFNB2        | 0.537 | 1.055 | 2.46  | UP |
| PPM1D        | 0.559 | 1.105 | 2.623 | UP |
| ZBTB10       | 0.425 | 0.779 | 1.806 | UP |
| PHLPP2       | 0.368 | 0.662 | 1.536 | UP |
| NFKB1        | 0.414 | 0.723 | 1.717 | UP |
| LIN54        | 0.359 | 0.636 | 1.484 | UP |
| ZNF669       | 0.472 | 0.863 | 1.988 | UP |
| ITFG2        | 0.382 | 0.669 | 1.512 | UP |
| COG3         | 0.376 | 0.69  | 1.544 | UP |
| RNF139       | 0.307 | 0.518 | 1.199 | UP |
| NLGN3        | 0.271 | 0.473 | 1.182 | UP |

|              |       |       |        |    |
|--------------|-------|-------|--------|----|
| KIAA0415     | 0.468 | 0.791 | 1.96   | UP |
| VNN2         | 0.508 | 0.828 | 2.099  | UP |
| ZNF761       | 0.352 | 0.621 | 1.541  | UP |
| NFYA         | 0.329 | 0.593 | 1.499  | UP |
| SLC7A6       | 0.504 | 0.934 | 2.309  | UP |
| LOC100131257 | 0.239 | 0.443 | 1.067  | UP |
| IER5         | 0.564 | 1.041 | 2.598  | UP |
| ARL5B        | 0.875 | 1.544 | 3.839  | UP |
| C16orf11     | 0.225 | 0.467 | 1.205  | UP |
| LSM14A       | 0.237 | 0.457 | 1.167  | UP |
| HIVEP1       | 0.489 | 0.897 | 2.337  | UP |
| RNF219       | 0.247 | 0.468 | 1.211  | UP |
| CPSF7        | 0.214 | 0.41  | 1.087  | UP |
| CREB5        | 0.446 | 0.872 | 2.154  | UP |
| C10orf28     | 0.372 | 0.729 | 1.841  | UP |
| GTF2B        | 0.32  | 0.547 | 1.481  | UP |
| C1orf26      | 0.359 | 0.625 | 1.692  | UP |
| TJAP1        | 0.24  | 0.393 | 1.073  | UP |
| TRIM11       | 0.302 | 0.515 | 1.368  | UP |
| POFUT2       | 0.559 | 1.002 | 2.654  | UP |
| SSBP2        | 0.434 | 0.565 | 1.61   | UP |
| KIN          | 0.294 | 0.369 | 1.043  | UP |
| HBP1         | 0.443 | 0.595 | 1.7    | UP |
| GADD45G      | 0.648 | 0.848 | 2.475  | UP |
| DDX47        | 0.374 | 0.491 | 1.393  | UP |
| CCL20        | 0.914 | 1.243 | 3.452  | UP |
| UBE2G1       | 0.293 | 0.4   | 1.065  | UP |
| C9orf80      | 0.38  | 0.535 | 1.425  | UP |
| WDR47        | 0.589 | 0.8   | 2.125  | UP |
| CKS2         | 0.415 | 0.538 | 1.465  | UP |
| REL          | 0.691 | 1.033 | 2.846  | UP |
| LINS1        | 0.525 | 0.792 | 2.179  | UP |
| HIST2H2BE    | 0.42  | 0.647 | 1.736  | UP |
| KLHL15       | 0.747 | 1.185 | 2.871  | UP |
| GLYAT        | 0.32  | 0.505 | 1.257  | UP |
| GADD45B      | 1.235 | 1.951 | 4.82   | UP |
| PVT1         | 0.425 | 0.663 | 1.67   | UP |
| C18orf25     | 0.301 | 0.433 | 1.091  | UP |
| RANGAP1      | 0.079 | 0.644 | 1.481  | UP |
| GABPB1       | 0.145 | 1.032 | 2.272  | UP |
| CRCP         | 0.129 | 0.846 | 1.931  | UP |
| BEND7        | 0.105 | 0.531 | 1.202  | UP |
| ICOSLG       | 0.051 | 0.629 | 1.43   | UP |
| UHRF2        | 0.055 | 0.442 | 1.112  | UP |
| TRMT61A      | 0.102 | 0.717 | 1.803  | UP |
| GLTP         | 0.082 | 0.725 | 1.745  | UP |
| MAMLD1       | 0.108 | 0.502 | 1.338  | UP |
| MAFG         | 0.087 | 0.416 | 1.096  | UP |
| ZNF791       | 0.09  | 0.463 | 1.218  | UP |
| TNKS2        | 0.08  | 0.45  | 1.158  | UP |
| SAMD8        | 0.242 | 1.245 | 3.17   | UP |
| FLJ31104     | 0.09  | 0.434 | 1.05   | UP |
| C16orf80     | 0.114 | 0.495 | 1.243  | UP |
| MGC29506     | 0.077 | 0.412 | 1.002  | UP |
| ARF4         | 0.088 | 0.514 | 1.231  | UP |
| SMN2         | 0.085 | 0.534 | 1.306  | UP |
| ARID3B       | 0.363 | 1.194 | 3.051  | UP |
| AIM1L        | 0.241 | 0.758 | 1.896  | UP |
| VPS37B       | 0.298 | 0.92  | 2.309  | UP |
| TIMP3        | 0.199 | 0.606 | 1.569  | UP |
| CDR2         | 0.154 | 0.456 | 1.201  | UP |
| NFKBIE       | 0.402 | 1.402 | 3.603  | UP |
| KIRREL       | 0.217 | 0.811 | 2.082  | UP |
| EDC3         | 0.132 | 0.472 | 1.193  | UP |
| ATXN2        | 0.138 | 0.454 | 1.163  | UP |
| EIF3J        | 0.166 | 0.58  | 1.345  | UP |
| ARL5C        | 0.295 | 1.128 | 2.577  | UP |
| PCID2        | 0.176 | 0.576 | 1.32   | UP |
| PDRG1        | 0.303 | 1.113 | 2.66   | UP |
| CXCR4        | 0.214 | 0.782 | 1.882  | UP |
| C7orf20      | 0.221 | 0.817 | 1.924  | UP |
| MDM4         | 0.209 | 0.628 | 1.424  | UP |
| FRRS1        | 0.184 | 0.58  | 1.288  | UP |
| SPATA2L      | 0.251 | 0.744 | 1.678  | UP |
| PWWP2A       | 0.17  | 0.485 | 1.083  | UP |
| PHF8         | 0.214 | 0.57  | 1.279  | UP |
| MUL1         | 0.176 | 0.45  | 1.028  | UP |
| ATF3         | 1.021 | 2.492 | 5.696  | UP |
| ZNF699       | 0.276 | 0.717 | 1.628  | UP |
| SMURF2       | 0.379 | 0.947 | 2.114  | UP |
| HIC2         | 0.313 | 0.893 | 2.082  | UP |
| DNAL1        | 0.179 | 0.459 | 1.096  | UP |
| EGR1         | 1.445 | 4.102 | 10.025 | UP |
| EPC1         | 0.207 | 0.62  | 1.342  | UP |
| AKAP12       | 0.342 | 1.101 | 2.358  | UP |
| TIPARP       | 0.292 | 0.943 | 2.01   | UP |
| STX6         | 0.218 | 0.687 | 1.414  | UP |
| GADD45A      | 0.594 | 1.992 | 4.031  | UP |

|              |        |       |       |    |
|--------------|--------|-------|-------|----|
| FBXL12       | 0.411  | 1.235 | 2.589 | UP |
| ACVR2A       | 0.405  | 1.179 | 2.492 | UP |
| FOSB         | 1.36   | 3.751 | 7.85  | UP |
| EAF1         | 0.351  | 0.945 | 1.958 | UP |
| DEFB112      | 0.181  | 0.51  | 1.053 | UP |
| LOC100131154 | 0.165  | 0.698 | 1.455 | UP |
| DUSP21       | 0.151  | 0.601 | 1.239 | UP |
| MED1         | 0.139  | 0.593 | 1.251 | UP |
| LOC100128893 | 0.172  | 0.695 | 1.49  | UP |
| RUNX2        | 0.178  | 0.865 | 1.797 | UP |
| STARD13      | 0.342  | 1.177 | 2.585 | UP |
| SMTN         | 0.156  | 0.61  | 1.349 | UP |
| HIST1H1C     | 0.148  | 0.544 | 1.157 | UP |
| CYR61        | 0.535  | 1.864 | 3.892 | UP |
| ZFAND3       | 0.091  | 0.583 | 1.21  | UP |
| LOC400043    | 0.082  | 0.503 | 1.059 | UP |
| TMEM39A      | 0.081  | 0.65  | 1.343 | UP |
| SP2          | 0.071  | 0.801 | 1.591 | UP |
| FOXD1        | 0.117  | 1.459 | 2.843 | UP |
| LOC727962    | 0.055  | 0.526 | 1.037 | UP |
| FLJ41170     | 0.098  | 0.903 | 1.815 | UP |
| PTPN14       | 0.075  | 0.677 | 1.325 | UP |
| CDCA4        | 0.207  | 1.071 | 2.083 | UP |
| BTG1         | 0.215  | 1.193 | 2.3   | UP |
| CSNK1D       | 0.149  | 0.746 | 1.462 | UP |
| CHD2         | 0.251  | 1.345 | 2.62  | UP |
| RAPGEF1      | 0.087  | 0.547 | 1.059 | UP |
| GMEB2        | 0.086  | 1.005 | 1.893 | UP |
| CHMP4C       | 0.159  | 1.585 | 2.876 | UP |
| NFYC         | 0.043  | 0.611 | 1.059 | UP |
| LOC100128591 | 0.057  | 0.674 | 1.177 | UP |
| HIF1AN       | -0.066 | 0.395 | 1.268 |    |
| ATF7IP       | -0.093 | 0.539 | 1.775 |    |
| TIAL1        | -0.06  | 0.331 | 1.075 |    |
| RCL1         | -0.1   | 0.523 | 1.54  |    |
| MERTK        | -0.089 | 0.421 | 1.26  |    |
| LRRRC8E      | -0.038 | 0.714 | 2.12  |    |
| LIMA1        | -0.037 | 0.606 | 1.774 |    |
| PIK3CD       | -0.062 | 0.728 | 2.107 |    |
| HIST1H2AA    | -0.058 | 0.585 | 1.871 |    |
| EP300        | -0.024 | 0.316 | 1.031 |    |
| POLR2D       | -0.029 | 0.391 | 1.205 |    |
| MTHFR        | -0.02  | 0.389 | 1.223 |    |
| SLC25A26     | -0.007 | 0.386 | 1.265 |    |
| RAB21        | 0.02   | 0.4   | 1.039 | UP |
| ADM          | 0.053  | 1.268 | 3.257 | UP |
| NANP         | 0.029  | 0.513 | 1.369 | UP |
| GOLGA7B      | 0.043  | 0.635 | 1.773 | UP |
| BTG2         | 0.065  | 1.199 | 3.331 | UP |
| HINFP        | 0.01   | 0.348 | 1.004 | UP |
| RP9P         | 0.051  | 0.451 | 1.291 | UP |
| ANXA5        | 0.056  | 0.447 | 1.287 | UP |
| LHFP         | 0.068  | 0.726 | 1.969 | UP |
| LY6G6F       | -0.017 | 0.404 | 1.063 |    |
| LOC644100    | -0.017 | 0.626 | 1.611 |    |
| GDF6         | -0.038 | 1.251 | 3.127 |    |
| LOC401490    | -0.001 | 0.496 | 1.254 | UP |
| LIPT1        | 0.048  | 0.375 | 1.306 | UP |
| KCTD11       | 0.116  | 0.79  | 2.67  | UP |
| CORO1C       | 0.071  | 0.406 | 1.395 | UP |
| UAP1L1       | 0.09   | 0.585 | 1.832 | UP |
| IGHMBP2      | 0.107  | 0.566 | 1.781 | UP |
| MAK          | 0.044  | 0.334 | 1.064 | UP |
| NUP35        | 0.016  | 0.399 | 1.218 | UP |
| MAP3K1       | 0.013  | 0.421 | 1.289 | UP |
| RAB30        | -0.001 | 1.018 | 3.128 |    |
| SQSTM1       | 0.036  | 0.444 | 1.366 | UP |
| RBM22        | 0.044  | 0.558 | 1.754 | UP |
| RNF185       | 0.032  | 0.638 | 2.129 | UP |
| LOC100129380 | 0.029  | 0.477 | 1.699 | UP |
| TP53BP2      | 0.171  | 0.477 | 1.725 | UP |
| ELL          | 0.261  | 0.731 | 2.627 | UP |
| RUNX1        | 0.24   | 0.799 | 2.835 | UP |
| RNF121       | 0.109  | 0.316 | 1.203 | UP |
| PRKRIP1      | 0.126  | 0.411 | 1.558 | UP |
| RELT         | 0.288  | 0.735 | 2.579 | UP |
| CXorf15      | 0.147  | 0.33  | 1.199 | UP |
| MBD5         | 0.151  | 0.428 | 1.455 | UP |
| LOC100128528 | 0.097  | 0.303 | 1.043 | UP |
| KLF10        | 0.268  | 0.876 | 2.891 | UP |
| GFRA2        | 0.145  | 0.434 | 1.453 | UP |
| ORC6L        | 0.195  | 0.405 | 1.382 | UP |
| LOC642278    | 0.156  | 0.337 | 1.154 | UP |
| BTAF1        | 0.164  | 0.349 | 1.138 | UP |
| KRTAP6-3     | 0.152  | 0.386 | 1.28  | UP |
| HABP4        | 0.126  | 0.319 | 1.053 | UP |
| SIAH1        | 0.201  | 0.504 | 1.593 | UP |
| DDA1         | 0.084  | 0.368 | 1.157 | UP |

|  |              |        |        |       |    |
|--|--------------|--------|--------|-------|----|
|  | CHRNA10      | 0.133  | 0.606  | 1.956 | UP |
|  | ETS1         | 0.242  | 1.083  | 3.347 | UP |
|  | LOC100129112 | 0.132  | 0.501  | 1.628 | UP |
|  | SLC26A8      | 0.131  | 0.489  | 1.507 | UP |
|  | ALKBH1       | 0.151  | 0.561  | 1.687 | UP |
|  | SNRK         | 0.127  | 0.452  | 1.349 | UP |
|  | C5orf40      | 0.235  | 0.741  | 2.324 | UP |
|  | C14orf118    | 0.128  | 0.435  | 1.375 | UP |
|  | MAP3K7IP3    | 0.139  | 0.454  | 1.43  | UP |
|  | SOC57        | 0.067  | 0.366  | 1.038 | UP |
|  | RMND5A       | 0.09   | 0.568  | 1.611 | UP |
|  | MAML2        | 0.078  | 0.457  | 1.307 | UP |
|  | HELB         | 0.117  | 0.592  | 1.761 | UP |
|  | C15orf57     | 0.113  | 0.684  | 2.007 | UP |
|  | SETD4        | 0.204  | 0.546  | 1.495 | UP |
|  | PLGLB1       | 0.118  | 0.372  | 1.054 | UP |
|  | ABL2         | 0.283  | 0.867  | 2.383 | UP |
|  | SLC12A4      | 0.149  | 0.477  | 1.378 | UP |
|  | LOC100128130 | 0.152  | 0.484  | 1.397 | UP |
|  | AKIRIN1      | 0.133  | 0.503  | 1.377 | UP |
|  | ZCCHC3       | 0.186  | 0.539  | 1.635 | UP |
|  | TNFAIP3      | 0.495  | 1.457  | 4.397 | UP |
|  | E2F3         | 0.213  | 0.553  | 1.695 | UP |
|  | CCNT2        | 0.337  | 0.876  | 2.594 | UP |
|  | CRK          | 0.158  | 0.43   | 1.294 | UP |
|  | C20orf4      | 0.167  | 0.471  | 1.438 | UP |
|  | PISD         | 0.242  | 0.634  | 1.833 | UP |
|  | LEMD3        | 0.141  | 0.392  | 1.147 | UP |
|  | MAP3K9       | -0.215 | -0.212 | 2.578 |    |
|  | C9orf50      | -0.13  | -0.087 | 1.188 |    |
|  | NXF1         | -0.177 | -0.138 | 1.422 |    |
|  | KLHL26       | -0.196 | -0.094 | 1.394 |    |
|  | MCTP2        | -0.16  | -0.231 | 1.608 |    |
|  | EIF2AK3      | -0.119 | -0.176 | 1.191 |    |
|  | ZNF26        | -0.192 | -0.177 | 1.234 |    |
|  | LILRB3       | -0.208 | -0.189 | 1.19  |    |
|  | ZNF473       | -0.217 | -0.148 | 1.359 |    |
|  | FOXA3        | -0.381 | -0.26  | 2.245 |    |
|  | DNAJB4       | -0.139 | -0.303 | 1.325 |    |
|  | LOC645277    | -0.092 | -0.271 | 1.154 |    |
|  | TSC22D1      | -0.076 | -0.232 | 1.078 |    |
|  | DHRS2        | -0.119 | -0.309 | 1.477 |    |
|  | SPRYD5       | -0.212 | -0.348 | 1.46  |    |
|  | CRB1         | -0.166 | -0.308 | 1.18  |    |
|  | RP11-470P4.2 | -0.259 | -0.169 | 1.105 |    |
|  | FHL3         | -0.302 | -0.324 | 1.484 |    |
|  | ARVCF        | -0.293 | -0.27  | 1.336 |    |
|  | LOC645225    | -0.278 | -0.331 | 1.381 |    |
|  | DGCR11       | -0.282 | -0.23  | 1.142 |    |
|  | RORA         | -0.053 | -0.141 | 1.356 |    |
|  | ITGB1BP2     | -0.077 | -0.409 | 1.989 |    |
|  | C17orf99     | -0.041 | -0.618 | 3.356 |    |
|  | APOA5        | 0.042  | -0.442 | 1.887 |    |
|  | ADAM20       | 0.018  | -0.404 | 1.792 |    |
|  | SHC2         | 0.04   | -0.216 | 1.622 |    |
|  | AFF2         | 0.037  | -0.225 | 1.764 | UP |
|  | ZNF780A      | -0.01  | -0.164 | 1.122 |    |
|  | TSPYL2       | -0.019 | -0.352 | 2.332 |    |
|  | EDN1         | 0.02   | -0.201 | 1.303 |    |
|  | CXorf1       | 0.024  | -0.308 | 2.033 |    |
|  | ZNF286A      | 0.028  | -0.18  | 1.094 |    |
|  | AHSP         | 0.022  | -0.189 | 1.105 |    |
|  | LDLR         | 0.053  | -0.139 | 1.02  |    |
|  | CDO1         | 0.08   | -0.157 | 1.129 |    |
|  | LOC283483    | 0.132  | -0.31  | 1.426 |    |
|  | BCLAF1       | 0.122  | -0.202 | 1.132 |    |
|  | RG56         | 0.26   | -0.237 | 1.771 |    |
|  | C15orf55     | 0.184  | -0.114 | 1.022 |    |
|  | CC2D2B       | 0.223  | -0.044 | 1.032 |    |
|  | THOC6        | 0.326  | -0.032 | 1.158 |    |
|  | ZFAND5       | 0.286  | -0.077 | 1.125 |    |
|  | RBM39        | 0.506  | -0.157 | 1.806 |    |
|  | ARRDC3       | 0.365  | -0.09  | 1.2   |    |
|  | PLEKHG1      | 0.28   | -0.199 | 1.025 |    |
|  | NR4A1        | 0.673  | -0.378 | 2.252 |    |
|  | LOC285626    | 0.334  | -0.202 | 1.431 |    |
|  | ASGR1        | 0.303  | -0.15  | 1.12  |    |
|  | GABRA6       | 0.421  | -0.371 | 1.47  |    |
|  | LOC728152    | 0.297  | -0.363 | 1.092 |    |
|  | LOC100133264 | 0.41   | -0.462 | 1.203 |    |
|  | PELI1        | 0.125  | -0.283 | 1.027 |    |
|  | LOC731852    | 0.171  | -0.342 | 1.084 |    |
|  | CREBZF       | -0.013 | -0.459 | 1.308 |    |
|  | ATF7IP2      | 0.029  | -0.391 | 1.121 |    |
|  | GDF9         | 0.183  | -0.795 | 1.79  |    |
|  | LOC255025    | -0.541 | 0.148  | 1.411 |    |
|  | LOC100130141 | -0.634 | 0.201  | 1.48  |    |
|  | ZNF462       | -0.57  | 0.169  | 1.146 |    |

|  |              |        |        |       |    |
|--|--------------|--------|--------|-------|----|
|  | GRHL1        | -0.328 | 0.223  | 1.258 |    |
|  | FUBP1        | -0.349 | 0.197  | 1.373 |    |
|  | PLCL2        | -0.568 | 0.258  | 1.682 |    |
|  | NMT2         | -0.612 | 0.356  | 1.846 |    |
|  | EGR4         | -0.975 | 0.568  | 2.882 |    |
|  | RRAGC        | -0.377 | 0.257  | 1.303 |    |
|  | HIST4H4      | -0.671 | 0.418  | 2.191 |    |
|  | PRB4         | -0.23  | 0.09   | 1.083 |    |
|  | EIF1AD       | -0.257 | 0.115  | 1.322 |    |
|  | LOC100292680 | -0.389 | 0.098  | 1.819 |    |
|  | ZFYVE1       | -0.266 | 0.055  | 1.438 |    |
|  | HIST3H2BB    | -0.444 | 0.13   | 2.34  |    |
|  | KIAA1875     | -0.271 | -0.01  | 1.669 |    |
|  | DIDO1        | -0.17  | 0.002  | 1.002 |    |
|  | LOC100134423 | -0.338 | 0.035  | 1.817 |    |
|  | ZNF155       | -0.211 | 0.066  | 1.341 |    |
|  | NWD1         | -0.269 | 0.089  | 1.842 |    |
|  | LOC219690    | -0.296 | -0.076 | 1.588 |    |
|  | DCTN5        | -0.289 | -0.038 | 1.415 |    |
|  | CNKSR1       | -0.33  | -0.051 | 1.612 |    |
|  | ZNF8         | -0.223 | -0.034 | 1.105 |    |
|  | KGFLP1       | -0.234 | -0.038 | 1.119 |    |
|  | GUCY2D       | -0.408 | -0.032 | 1.794 |    |
|  | CDC25A       | -0.304 | -0.048 | 1.342 |    |
|  | STXBP6       | -0.573 | 0.092  | 1.692 |    |
|  | KCNJ9        | -0.352 | 0.072  | 1.138 |    |
|  | PPRC1        | -0.38  | -0.005 | 1.116 |    |
|  | HIST1H4J     | -0.448 | 0.027  | 1.334 |    |
|  | ZNF16        | -0.407 | 0.024  | 1.392 |    |
|  | MLL5         | 0.16   | -0.102 | 1.31  |    |
|  | LAG3         | 0.145  | -0.127 | 1.684 | UP |
|  | ZKSCAN5      | 0.053  | -0.091 | 1.113 | UP |
|  | IRF1         | 0.101  | -0.203 | 2.29  | UP |
|  | NUFIP1       | 0.027  | -0.103 | 1.408 | UP |
|  | CCDC49       | 0.058  | -0.05  | 1.369 | UP |
|  | NUP153       | 0.075  | -0.023 | 1.271 | UP |
|  | ARIH1        | 0.07   | -0.02  | 1.13  | UP |
|  | KRT27        | 0.091  | -0.055 | 1.469 | UP |
|  | GNLY         | 0.153  | -0.075 | 2.458 | UP |
|  | NPAT         | 0.168  | -0.036 | 1.023 |    |
|  | LOC100132855 | 0.402  | 0.012  | 2.669 | UP |
|  | ZNF317       | 0.181  | -0.007 | 1.546 | UP |
|  | LOC100132653 | 0.173  | -0.048 | 1.434 | UP |
|  | IPMK         | 0.06   | 0.038  | 1.131 | UP |
|  | ALS2         | 0.067  | 0.049  | 1.495 | UP |
|  | TNF          | 0.077  | 0.038  | 1.23  | UP |
|  | LOC541471    | 0.078  | 0.016  | 1.503 | UP |
|  | PNN          | 0.096  | 0.071  | 1.506 | UP |
|  | PLCB4        | 0.075  | 0.062  | 1.153 | UP |
|  | ZNF764       | 0.172  | 0.024  | 1.707 | UP |
|  | XAB2         | 0.12   | 0.035  | 1.104 | UP |
|  | KLHDC10      | 0.111  | 0.024  | 1.019 | UP |
|  | LOC728528    | 0.122  | 0.059  | 1.527 | UP |
|  | INO80        | 0.098  | 0.043  | 1.155 | UP |
|  | RRN3         | 0.13   | 0.026  | 1.55  | UP |
|  | FOXR1        | 0.135  | 0.037  | 1.622 | UP |
|  | C7orf43      | 0.231  | 0.141  | 1.855 | UP |
|  | ATP6V1D      | 0.155  | 0.1    | 1.29  | UP |
|  | CCKBR        | 0.314  | 0.178  | 2.418 | UP |
|  | WAPAL        | 0.146  | 0.101  | 1.378 | UP |
|  | USP43        | 0.212  | 0.096  | 1.986 | UP |
|  | C10orf62     | 0.148  | 0.091  | 1.64  | UP |
|  | TOR1AIP2     | 0.177  | 0.073  | 1.462 | UP |
|  | C1orf52      | 0.154  | 0.073  | 1.243 | UP |
|  | IL6          | 0.188  | 0.059  | 1.499 | UP |
|  | ZFP36        | 0.34   | 0.208  | 2.307 | UP |
|  | F3           | 0.312  | 0.225  | 2.233 | UP |
|  | LOC90586     | 0.187  | 0.091  | 1.231 | UP |
|  | C6orf94      | 0.168  | 0.091  | 1.111 | UP |
|  | SF3B4        | 0.13   | 0.157  | 1.712 | UP |
|  | LOC346329    | 0.121  | 0.123  | 1.333 | UP |
|  | PASD1        | 0.08   | 0.072  | 1.002 | UP |
|  | CLEC4A       | 0.127  | 0.141  | 1.819 | UP |
|  | YY1AP1       | 0.07   | 0.098  | 1.086 | UP |
|  | TAS2R10      | 0.105  | 0.193  | 1.677 | UP |
|  | PLAC4        | 0.064  | 0.124  | 1.217 | UP |
|  | CCRN4L       | 0.284  | 0.423  | 3.436 | UP |
|  | FOSL2        | -0.007 | 0.152  | 1.752 |    |
|  | ARAP2        | -0.019 | 0.199  | 2.153 |    |
|  | SOCS1        | -0.052 | 0.22   | 2.853 |    |
|  | C7orf64      | -0.017 | 0.058  | 1.215 |    |
|  | UBXN7        | -0.003 | 0.089  | 1.547 |    |
|  | HUS1         | -0.006 | 0.073  | 1.166 |    |
|  | FLCN         | 0.002  | 0.067  | 1.104 | UP |
|  | LOC643837    | 0.022  | 0.145  | 2.125 | UP |
|  | KLHL36       | 0.061  | 0.121  | 1.536 | UP |
|  | BAGE4        | 0.038  | 0.095  | 1.393 | UP |
|  | BMP2K        | -0.072 | 0.082  | 1.281 |    |

|              |        |        |       |    |
|--------------|--------|--------|-------|----|
| LOC100130419 | -0.055 | 0.089  | 1.167 |    |
| GLYR1        | -0.061 | 0.095  | 1.147 |    |
| DACT1        | -0.089 | 0.129  | 1.619 |    |
| RNU4ATAC     | -0.113 | 0.232  | 2.342 |    |
| IL4R         | -0.073 | 0.071  | 1.513 |    |
| RASAL2       | -0.039 | 0.212  | 1.889 |    |
| KIAA1267     | -0.034 | 0.151  | 1.331 |    |
| MS4A6E       | -0.044 | -0.061 | 2.878 |    |
| ID3          | 0.008  | -0.006 | 1.035 | UP |
| CYTH2        | -0.007 | 0.006  | 1.07  |    |
| CXorf21      | -0.017 | 0.011  | 1.314 |    |
| LOC100127937 | -0.04  | 0.008  | 1.314 |    |
| LOC729739    | -0.034 | 0.051  | 1.622 |    |
| C10orf111    | -0.046 | 0.038  | 1.45  |    |
| ZNF595       | -0.065 | -0.052 | 1.164 |    |
| PTGER4       | -0.187 | -0.099 | 3.085 |    |
| MMP25        | -0.196 | -0.068 | 2.722 |    |
| LOC646626    | -0.152 | -0.049 | 2.182 |    |
| NUDT17       | -0.125 | -0.04  | 2     |    |
| DUSP16       | -0.064 | -0.014 | 1.057 |    |
| GNL1         | -0.083 | -0.061 | 1.098 |    |
| CRTAM        | -0.118 | -0.064 | 1.339 |    |
| TGIF2        | -0.148 | 0.04   | 1.265 |    |
| CD83         | -0.422 | 0.201  | 4.731 |    |
| LOC648556    | -0.116 | 0.018  | 1.174 |    |
| CYSLTR1      | -0.102 | -0.01  | 1.044 |    |
| ARID5B       | -0.169 | -0.009 | 1.318 |    |
| OR52K1       | -0.469 | 0.547  | 2.357 |    |
| C17orf85     | -0.258 | 0.255  | 1.232 |    |
| FAM193A      | -0.314 | 0.314  | 1.733 |    |
| KIAA0174     | -0.205 | 0.32   | 1.468 |    |
| BCL2L13      | -0.157 | 0.265  | 1.221 |    |
| ZSCAN22      | -0.163 | 0.361  | 1.438 |    |
| SP4          | -0.178 | 0.346  | 1.232 |    |
| KLC3         | -0.334 | 0.811  | 2.539 |    |
| SERPINB5     | -0.16  | 0.46   | 1.497 |    |
| PHYHD1       | -0.085 | 0.316  | 1.043 |    |
| BEST3        | -0.098 | 0.338  | 1.096 |    |
| PLAGL2       | -0.096 | 0.299  | 1.018 |    |
| NECAP2       | -0.09  | 0.3    | 1.04  |    |
| C3orf59      | -0.103 | 0.459  | 2.491 |    |
| BCAR1        | -0.048 | 0.191  | 1.083 |    |
| TRANK1       | -0.068 | 0.309  | 1.61  |    |
| C3orf38      | -0.042 | 0.267  | 1.373 |    |
| MOBP         | -0.021 | 0.187  | 1.115 |    |
| AKIRIN2      | -0.013 | 0.197  | 1.105 |    |
| ZSWIM6       | 0.014  | 0.371  | 1.615 | UP |
| C5orf49      | 0.005  | 0.268  | 1.154 | UP |
| TEPP         | 0.028  | 0.36   | 1.627 | UP |
| ZNF175       | 0.036  | 0.293  | 1.273 | UP |
| SPATA2       | 0.061  | 0.431  | 1.86  | UP |
| KISS1        | 0.054  | 0.457  | 1.95  | UP |
| hCG_1795283  | 0.072  | 0.515  | 2.097 | UP |
| TP53RK       | 0.027  | 0.428  | 1.73  | UP |
| THBS1        | 0.014  | 0.282  | 1.467 | UP |
| LOC286059    | 0.017  | 0.201  | 1.065 | UP |
| KLF6         | 0.015  | 0.503  | 2.471 | UP |
| C20orf111    | 0.015  | 0.285  | 1.46  | UP |
| OR5C1        | 0.014  | 0.231  | 1.144 | UP |
| ZNF256       | 0.048  | 0.445  | 2.506 | UP |
| WDR26        | 0.001  | 0.208  | 1.181 | UP |
| FBXO28       | -0.05  | 0.277  | 1.179 |    |
| FAM71F2      | -0.035 | 0.242  | 1.073 |    |
| GPN2         | -0.054 | 0.439  | 1.847 |    |
| TCF20        | -0.012 | 0.265  | 1.05  |    |
| NEXN         | -0.018 | 0.527  | 2.218 |    |
| YTHDF1       | -0.116 | 0.391  | 1.645 |    |
| SART3        | -0.099 | 0.289  | 1.208 |    |
| ANKLE2       | -0.131 | 0.415  | 1.67  |    |
| CLTB         | -0.089 | 0.281  | 1.269 |    |
| DAPK3        | -0.091 | 0.486  | 1.812 |    |
| AMICA1       | -0.051 | 0.287  | 1.1   |    |
| QTRTD1       | -0.066 | 0.298  | 1.13  |    |
| C1orf63      | 0.113  | 0.313  | 2.404 | UP |
| BRD1         | 0.046  | 0.132  | 1.044 | UP |
| ZNFX1        | 0.062  | 0.218  | 1.608 | UP |
| ZNF79        | 0.039  | 0.149  | 1.079 | UP |
| KDMSB        | 0.017  | 0.175  | 1.402 | UP |
| TRAF1        | 0.069  | 0.355  | 2.975 | UP |
| EGR2         | 0.118  | 0.72   | 6.465 | UP |
| USP42        | -0.024 | 0.174  | 1.185 |    |
| NUAK2        | 0.006  | 0.446  | 3.1   | UP |
| LOC100129767 | 0.012  | 0.173  | 1.08  | UP |
| SNIP1        | 0.056  | 0.361  | 2.208 | UP |
| C17orf86     | 0.029  | 0.186  | 1.247 | UP |
| POU2F1       | -0.148 | 0.127  | 1.442 |    |
| OR5H1        | -0.112 | 0.091  | 1.068 |    |
| HMGXB3       | -0.19  | 0.118  | 1.436 |    |



|              |        |        |       |    |
|--------------|--------|--------|-------|----|
| ZNF542       | -0.276 | 0.253  | 2.164 |    |
| KIAA1543     | -0.153 | 0.124  | 1.072 |    |
| PLEKHO2      | -0.307 | 0.286  | 2.079 |    |
| ZBTB7B       | -0.084 | 0.172  | 1.395 |    |
| MIDN         | -0.101 | 0.162  | 1.255 |    |
| RAD18        | -0.203 | 0.249  | 2.049 |    |
| PLEKHF2      | -0.149 | 0.159  | 1.319 |    |
| ZNF530       | -0.139 | 0.208  | 1.471 |    |
| PNO1         | -0.1   | 0.144  | 1.021 |    |
| MAEA         | -0.123 | 0.202  | 1.173 |    |
| LOC100129390 | -0.148 | 0.27   | 1.485 |    |
| SUV420H1     | -0.172 | 0.231  | 1.398 |    |
| ZNF35        | -0.132 | 0.304  | 1.908 |    |
| ZNF134       | -0.172 | 0.384  | 2.445 |    |
| KATNA1       | -0.112 | 0.223  | 1.399 |    |
| ZNF263       | -0.124 | 0.276  | 1.583 |    |
| NEURL3       | -0.224 | 0.646  | 3.45  |    |
| WDR43        | 0.108  | 0.256  | 1.116 | UP |
| KIAA0226     | 0.126  | 0.268  | 1.208 | UP |
| ELK1         | 0.183  | 0.422  | 1.859 | UP |
| EYA3         | 0.103  | 0.217  | 1.032 | UP |
| DDI2         | 0.263  | 0.616  | 2.49  | UP |
| CBLL1        | 0.135  | 0.303  | 1.258 | UP |
| GPRCSB       | 0.206  | 0.579  | 2.378 | UP |
| MLL4         | 0.146  | 0.245  | 1.128 | UP |
| AFTPH        | 0.157  | 0.264  | 1.203 | UP |
| ZMYM5        | 0.144  | 0.276  | 1.234 | UP |
| SPRED3       | 0.218  | 0.416  | 1.827 | UP |
| ZNF223       | 0.15   | 0.33   | 1.274 | UP |
| SERTAD1      | 0.447  | 0.929  | 3.57  | UP |
| OR7ESP       | 0.189  | 0.38   | 1.516 | UP |
| SNW1         | 0.167  | 0.297  | 1.156 | UP |
| LOC100132469 | 0.336  | 0.629  | 2.376 | UP |
| LOC100130828 | 0.254  | 0.504  | 1.927 | UP |
| ZNF193       | 0.166  | 0.275  | 1.061 | UP |
| ANKRD33B     | 0.358  | 0.582  | 2.348 | UP |
| GPR84        | 0.062  | 0.249  | 1.058 | UP |
| HMGCS1       | 0.151  | 0.543  | 2.353 | UP |
| FAM53C       | 0.121  | 0.383  | 1.629 | UP |
| SULT1B1      | 0.083  | 0.29   | 1.164 | UP |
| CYP1A1       | 0.233  | 0.952  | 3.794 | UP |
| ZNF321       | 0.057  | 0.268  | 1.287 | UP |
| DLX2         | 0.184  | 0.85   | 4.299 | UP |
| CCDC64B      | 0.146  | 0.72   | 3.683 | UP |
| C1orf230     | 0.051  | 0.264  | 1.368 | UP |
| ZNF121       | 0.096  | 0.372  | 1.794 | UP |
| CBX4         | 0.087  | 0.304  | 1.434 | UP |
| KIAA0753     | 0.06   | 0.204  | 1.031 | UP |
| ZBTB43       | 0.136  | 0.389  | 1.95  | UP |
| NRF1         | 0.101  | 0.333  | 1.845 | UP |
| AHR          | 0.071  | 0.217  | 1.227 | UP |
| SLC1A3       | 0.091  | 0.261  | 1.407 | UP |
| MAGEA1       | 0.115  | 0.181  | 1.113 | UP |
| SYNJ1        | 0.164  | 0.326  | 2.023 | UP |
| NAB2         | 0.236  | 0.43   | 2.789 | UP |
| CPEB3        | 0.178  | 0.383  | 2.295 | UP |
| C1orf55      | 0.173  | 0.353  | 2.183 | UP |
| ZNF227       | 0.148  | 0.32   | 1.95  | UP |
| ZNF586       | 0.169  | 0.342  | 1.982 | UP |
| ATF6         | 0.098  | 0.186  | 1.06  | UP |
| TAP2         | 0.119  | 0.229  | 1.193 | UP |
| LY6G5B       | 0.13   | 0.236  | 1.27  | UP |
| TBX21        | 0.243  | 0.57   | 2.953 | UP |
| MED21        | 0.103  | 0.217  | 1.097 | UP |
| MAGEA2B      | 0.114  | 0.239  | 1.265 | UP |
| ZNF827       | 0.119  | 0.185  | 1.011 | UP |
| GPR146       | 0.262  | 0.382  | 1.93  | UP |
| OLR1         | 0.207  | 0.225  | 1.434 | UP |
| DUSP8        | 0.21   | 0.219  | 1.361 | UP |
| YTHDF3       | 0.206  | 0.196  | 1.35  | UP |
| GTPBP4       | 0.181  | 0.181  | 1.081 | UP |
| C17orf54     | 0.25   | 0.271  | 1.523 | UP |
| ZNHIT6       | 0.216  | 0.246  | 1.403 | UP |
| TRIO         | 0.235  | 0.255  | 1.452 | UP |
| MECP2        | 0.161  | 0.183  | 1.021 | UP |
| IKZF5        | 0.306  | 0.383  | 2.166 | UP |
| ZBTB40       | 0.242  | 0.287  | 1.464 | UP |
| LOC100128233 | 0.243  | 0.258  | 1.358 | UP |
| IL28A        | 0.172  | 0.197  | 1.405 | UP |
| IQCA1L       | 0.26   | 0.247  | 1.971 | UP |
| FAM46B       | 0.255  | 0.258  | 1.951 | UP |
| SERTAD3      | 0.211  | 0.213  | 1.542 | UP |
| RLF          | 0.347  | 0.345  | 2.621 | UP |
| GLIS3        | 0.192  | 0.161  | 1.342 | UP |
| KDM6A        | 0.199  | 0.18   | 1.7   | UP |
| KLF2         | -0.969 | -0.195 | 1.234 |    |
| PIK3IP1      | -0.618 | -0.236 | 1.311 |    |
| DEFB136      | -0.619 | -0.184 | 1.333 |    |

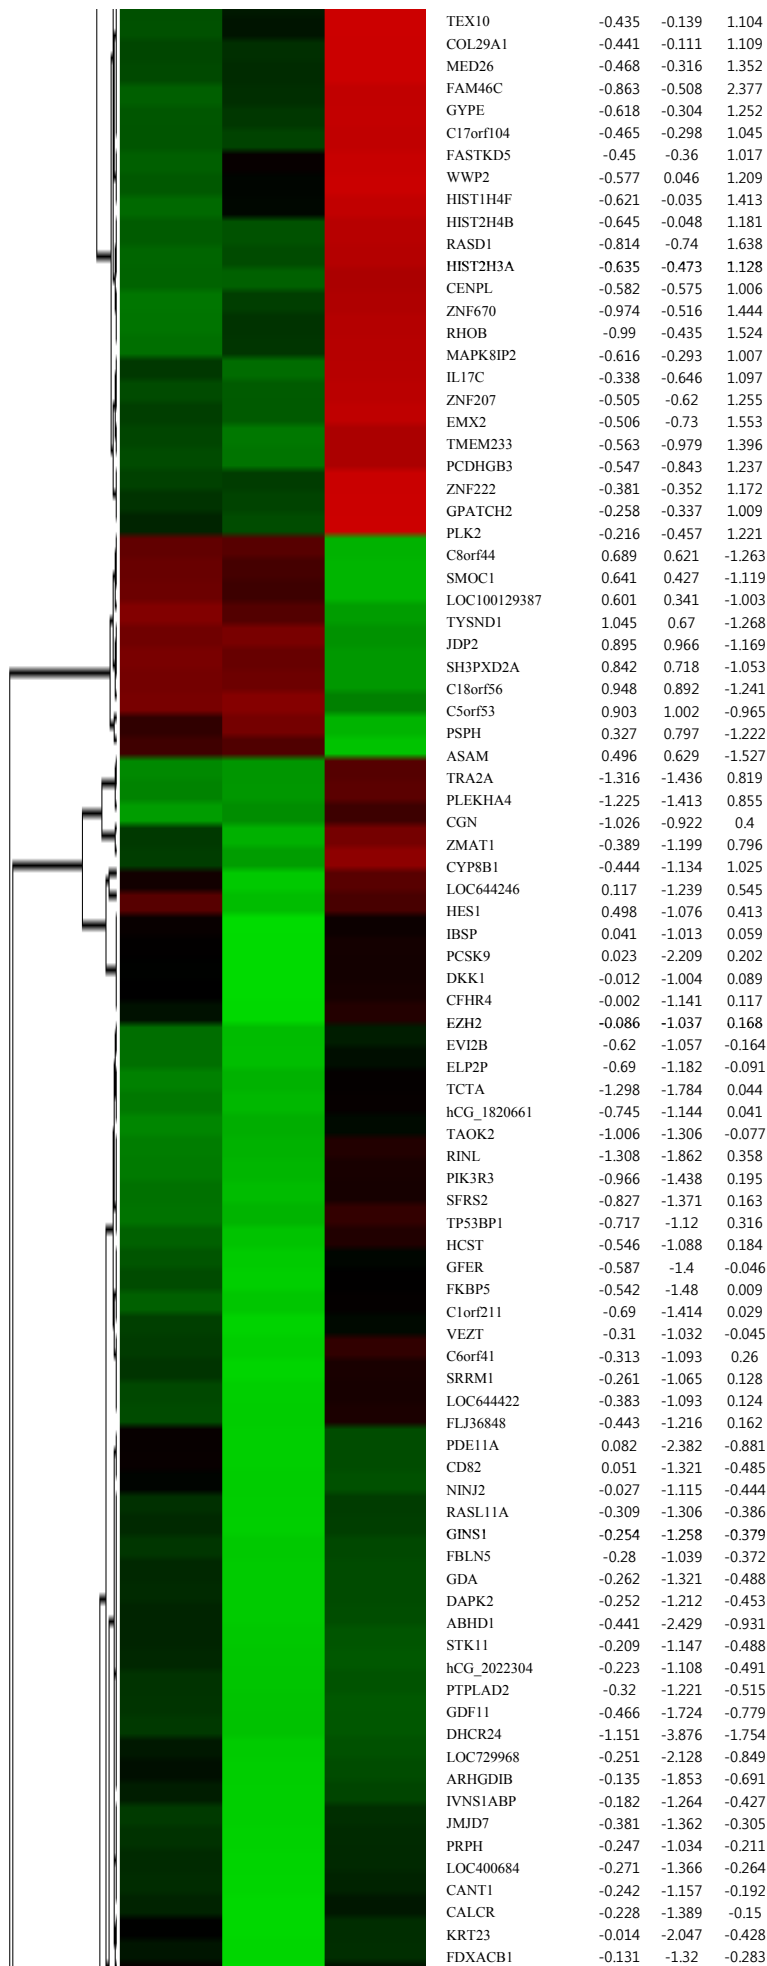

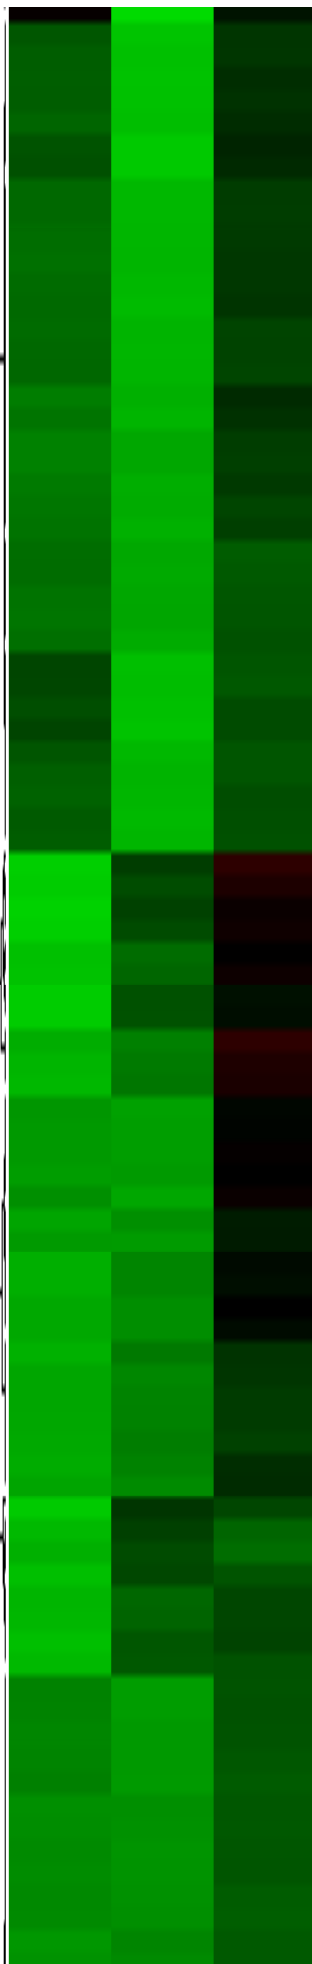

|              |        |        |        |
|--------------|--------|--------|--------|
| LOC100131000 | 0.031  | -1.037 | -0.094 |
| C12orf34     | -0.561 | -1.28  | -0.346 |
| WTAP         | -0.531 | -1.088 | -0.311 |
| LOC100128437 | -0.515 | -1.054 | -0.249 |
| FAM47B       | -0.547 | -1.134 | -0.293 |
| HIC1         | -0.96  | -1.798 | -0.415 |
| NTF4         | -0.559 | -1.341 | -0.242 |
| MMRN1        | -0.512 | -1.288 | -0.266 |
| PGBD4        | -0.758 | -1.334 | -0.434 |
| C6orf52      | -0.649 | -1.144 | -0.384 |
| NRG1         | -0.851 | -1.409 | -0.455 |
| GSG2         | -0.695 | -1.125 | -0.346 |
| SUSD5        | -0.722 | -1.241 | -0.372 |
| KATNAL2      | -0.818 | -1.455 | -0.408 |
| ETNK2        | -0.674 | -1.127 | -0.429 |
| SLC45A4      | -1.336 | -2.333 | -0.861 |
| GRID2IP      | -0.92  | -1.609 | -0.619 |
| THY1         | -0.829 | -1.161 | -0.283 |
| MBLAC1       | -0.804 | -1.252 | -0.34  |
| HEJ1         | -0.832 | -1.077 | -0.394 |
| DNAJA1       | -0.886 | -1.142 | -0.433 |
| GBA          | -0.745 | -1.057 | -0.35  |
| LOC440181    | -1.342 | -1.952 | -0.782 |
| FKBP15       | -0.731 | -1.127 | -0.406 |
| RAB36        | -0.804 | -1.24  | -0.679 |
| C8orf38      | -0.652 | -1.025 | -0.538 |
| SH2D3C       | -0.898 | -1.299 | -0.674 |
| AFF3         | -0.842 | -1.187 | -0.607 |
| TMEM114      | -0.743 | -1.145 | -0.543 |
| OAZ2         | -0.516 | -1.424 | -0.634 |
| CDKN2C       | -0.62  | -1.677 | -0.784 |
| LOC729013    | -0.653 | -1.588 | -0.623 |
| HNRPDL       | -0.595 | -1.697 | -0.653 |
| LOC100133408 | -0.565 | -1.226 | -0.568 |
| EXT1         | -0.54  | -1.022 | -0.484 |
| ARMS2        | -0.795 | -1.471 | -0.623 |
| SFRS6        | -0.777 | -1.585 | -0.679 |
| C6orf62      | -0.851 | -1.67  | -0.741 |
| FUS          | -1.062 | -0.317 | 0.233  |
| C17orf51     | -1.23  | -0.46  | 0.18   |
| LOC145694    | -1.09  | -0.337 | 0.056  |
| ADD1         | -1.222 | -0.443 | 0.092  |
| TMEM182      | -1.124 | -0.632 | 0.011  |
| LOC100129675 | -1.023 | -0.539 | 0.071  |
| PCBP3OT      | -1.018 | -0.404 | -0.083 |
| BCL9         | -1.331 | -0.539 | -0.087 |
| SHROOM2      | -1.532 | -1.134 | 0.399  |
| ZNF316       | -2.083 | -1.4   | 0.354  |
| SNAR-A3      | -1.312 | -0.843 | 0.185  |
| ZNF187       | -0.963 | -1.036 | -0.04  |
| LOC100134102 | -1.222 | -1.262 | -0.036 |
| ZNF280A      | -1.022 | -1.056 | 0.038  |
| GPRASP1      | -1.127 | -1.106 | -0.001 |
| SFRS7        | -1.101 | -1.286 | 0.079  |
| HIST1H2AL    | -1.848 | -1.6   | -0.321 |
| GPR160       | -1.335 | -1.344 | -0.236 |
| HYMAI        | -1.283 | -0.973 | -0.073 |
| CNN2         | -1.16  | -0.88  | -0.095 |
| TSPAN10      | -1.018 | -0.857 | 0.001  |
| ANKRD34B     | -1.288 | -1.086 | -0.086 |
| HIST1H2AI    | -1.083 | -0.74  | -0.313 |
| GMIP         | -1.269 | -1.03  | -0.405 |
| HDX          | -1.035 | -0.818 | -0.369 |
| ACTRT1       | -1.08  | -0.84  | -0.382 |
| RAD51        | -1.077 | -0.802 | -0.418 |
| LOC390760    | -2.045 | -1.548 | -0.545 |
| HHEX         | -1.055 | -0.887 | -0.278 |
| FLJ46020     | -1.084 | -0.286 | -0.377 |
| LOC729856    | -1.037 | -0.362 | -0.57  |
| CYFIP2       | -1.024 | -0.438 | -0.638 |
| RFTN1        | -2.019 | -0.756 | -0.892 |
| PLIN2        | -1.074 | -0.614 | -0.417 |
| APLNR        | -1.372 | -0.754 | -0.523 |
| OR56A1       | -1.162 | -0.525 | -0.408 |
| EPHB3        | -1.621 | -0.773 | -0.719 |
| SNHG7        | -1.131 | -1.365 | -0.725 |
| ANK2         | -0.925 | -1.11  | -0.571 |
| ZNF512       | -1.264 | -1.439 | -0.786 |
| C17orf96     | -0.94  | -1.084 | -0.622 |
| ARNT2        | -0.835 | -1.006 | -0.594 |
| LOC100130370 | -1.428 | -1.432 | -0.869 |
| GPR82        | -1.715 | -1.764 | -1.073 |
| SLC43A2      | -2.064 | -2.219 | -1.284 |
| FABP12       | -0.966 | -1.011 | -0.585 |
| RNU12        | -1.567 | -1.667 | -1.06  |
| MRAS         | -1.272 | -1.316 | -0.867 |
| MED12        | -1.305 | -1.149 | -0.767 |
| SYT8         | -2.645 | -2.499 | -1.619 |

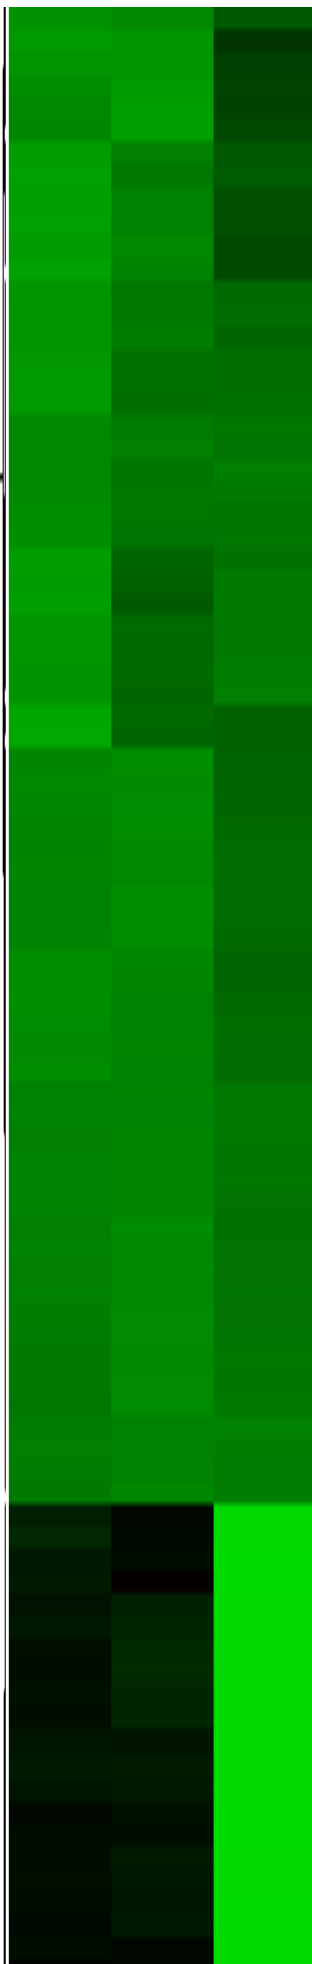

|               |        |        |        |
|---------------|--------|--------|--------|
| LOC729683     | -1.36  | -1.277 | -0.844 |
| ALPK3         | -1.436 | -1.387 | -0.48  |
| ABHD11        | -1.223 | -1.223 | -0.532 |
| LOC100134041  | -1.173 | -1.264 | -0.565 |
| ZNF434        | -1.45  | -1.682 | -0.714 |
| FLVCR2        | -0.913 | -1.077 | -0.487 |
| HIST1H1B      | -1.227 | -1.001 | -0.696 |
| HEYL          | -2.409 | -1.784 | -1.39  |
| SUPT16H       | -1.057 | -0.863 | -0.536 |
| RFC2          | -1.061 | -0.855 | -0.53  |
| RGAG4         | -1.023 | -0.905 | -0.492 |
| C22orf25      | -1.061 | -0.87  | -0.482 |
| TTYT17A       | -1.627 | -1.301 | -1.153 |
| SLC4A2        | -1.272 | -1.041 | -0.945 |
| LIMS2         | -1.301 | -1.105 | -0.902 |
| OTUB2         | -1.007 | -0.761 | -0.741 |
| MTG1          | -1.264 | -0.919 | -0.91  |
| LOC400655     | -1.434 | -1.047 | -1.055 |
| UNQ9374       | -1.401 | -1.272 | -1.235 |
| MANF          | -1.291 | -1.193 | -1.094 |
| LOC348761     | -1.342 | -1.142 | -1.239 |
| FAM117A       | -1.135 | -0.978 | -1.003 |
| LUZP2         | -1.594 | -1.343 | -1.316 |
| ACOT11        | -1.074 | -0.872 | -0.895 |
| APOA4         | -1.168 | -0.754 | -0.848 |
| LOC100128292  | -1.037 | -0.65  | -0.817 |
| FAM22B        | -1.122 | -0.638 | -0.867 |
| GJC3          | -1.033 | -0.746 | -0.816 |
| C22orf27      | -1.523 | -1.056 | -1.24  |
| PF4V1         | -1.068 | -0.772 | -0.91  |
| ANKRD2        | -1.161 | -0.818 | -1.007 |
| ZNF239        | -1.183 | -0.756 | -0.707 |
| HOMER2        | -1.124 | -0.679 | -0.66  |
| LOC727916     | -0.939 | -1.001 | -0.701 |
| TFCP2L1       | -2.223 | -2.256 | -1.682 |
| PRR19         | -1.404 | -1.452 | -1.075 |
| LOC729669     | -1.247 | -1.318 | -0.975 |
| LOC151121     | -1.372 | -1.425 | -1.131 |
| LOC100132015  | -1.146 | -1.16  | -0.929 |
| FBXO41        | -1.209 | -1.322 | -1.017 |
| FBXO25        | -1.401 | -1.537 | -1.171 |
| C17orf72      | -1.774 | -1.915 | -1.434 |
| LOC283480     | -1.814 | -1.731 | -1.305 |
| C11orf45      | -1.113 | -1.058 | -0.814 |
| ITIH1         | -1.064 | -0.968 | -0.779 |
| H1FNT         | -1.083 | -1.001 | -0.862 |
| SNORA20       | -1.828 | -1.756 | -1.433 |
| NCRNA00118    | -1.167 | -1.09  | -0.888 |
| NAP1L2        | -1.243 | -1.284 | -1.17  |
| LOC100130264  | -1.584 | -1.607 | -1.482 |
| GLI3          | -1.628 | -1.705 | -1.537 |
| C15orf34      | -1.679 | -1.747 | -1.544 |
| XYLB          | -0.98  | -1.014 | -0.903 |
| LILRA1        | -1.371 | -1.383 | -1.196 |
| ZNF777        | -0.929 | -1.025 | -0.818 |
| RBMXL2        | -1.324 | -1.398 | -1.184 |
| PIPSK1C       | -0.994 | -1.079 | -0.903 |
| MAPK8IP1      | -1.171 | -1.254 | -1.062 |
| STON1-GTF2A1L | -1.077 | -1.187 | -0.979 |
| PRO1596       | -1.006 | -1.124 | -0.941 |
| TMEM173       | -1.275 | -1.419 | -1.251 |
| TMEM110       | -0.941 | -1.069 | -0.908 |
| TLX2          | -1.799 | -2.094 | -1.813 |
| PROK2         | -2.045 | -2.119 | -2.13  |
| EDNRB         | -1.039 | -1.053 | -1.034 |
| SRR           | -1.256 | -1.33  | -1.269 |
| C19orf47      | -1.125 | -1.241 | -1.145 |
| KIAA1407      | -0.185 | -0.041 | -1.315 |
| CALHM2        | -0.348 | -0.087 | -1.912 |
| hCG_1646157   | -0.126 | -0.065 | -1.181 |
| PAQR4         | -0.152 | 0.034  | -1.267 |
| GALNTL4       | -0.17  | -0.303 | -1.908 |
| FLJ40330      | -0.205 | -0.308 | -1.845 |
| TRERF1        | -0.136 | -0.376 | -1.967 |
| C9orf140      | -0.146 | -0.451 | -2.296 |
| ZFP161        | -0.17  | -0.378 | -2.167 |
| CNO           | -0.075 | -0.212 | -1.24  |
| FLJ33630      | -0.212 | -0.194 | -2.059 |
| PEX12         | -0.176 | -0.186 | -1.463 |
| CCNO          | -0.13  | -0.154 | -1.29  |
| LACTB2        | -0.043 | -0.09  | -1.097 |
| BIN1          | -0.075 | -0.089 | -1.345 |
| FLJ38109      | -0.076 | -0.14  | -1.129 |
| TUSC1         | -0.086 | -0.128 | -1.184 |
| B3GNTL1       | -0.113 | -0.2   | -1.919 |
| TBC1D4        | -0.072 | -0.191 | -1.728 |
| ZNF524        | -0.082 | -0.035 | -1.264 |
| C9orf64       | -0.025 | -0.042 | -1.489 |

|  |              |        |        |        |
|--|--------------|--------|--------|--------|
|  | SHMT2        | 0.022  | -0.073 | -1.318 |
|  | CCDC90B      | 0.013  | -0.081 | -1.273 |
|  | ENDOG        | 0.029  | -0.095 | -1.105 |
|  | IRAK4        | 0.143  | -0.341 | -1.047 |
|  | GGCT         | 0.137  | -0.299 | -1.082 |
|  | BMP6         | 0.213  | -0.588 | -2.173 |
|  | TMCO6        | 0.119  | -0.39  | -1.375 |
|  | CXXC4        | 0.153  | -0.513 | -1.892 |
|  | IRAK1BP1     | 0.138  | -0.445 | -1.407 |
|  | ELF3         | 0.1    | -0.359 | -1.177 |
|  | SIPA1        | 0.112  | -0.307 | -1.039 |
|  | CPNE4        | 0.174  | -0.516 | -1.71  |
|  | FAM117B      | 0.088  | -0.395 | -1.291 |
|  | CYP2R1       | 0.176  | -0.867 | -2.79  |
|  | LOC283028    | 0.095  | -0.38  | -1.202 |
|  | ZNF33B       | 0.078  | -0.565 | -1.954 |
|  | NBN          | 0.053  | -0.503 | -1.657 |
|  | MND1         | 0.058  | -0.419 | -1.405 |
|  | MED11        | 0.058  | -0.412 | -1.396 |
|  | MAT2A        | 0.074  | -0.394 | -1.407 |
|  | C6orf114     | 0.073  | -0.4   | -1.442 |
|  | TUBGCP5      | 0.108  | -0.373 | -1.59  |
|  | C14orf128    | 0.104  | -0.412 | -1.694 |
|  | WIP1         | 0.071  | -0.289 | -1.226 |
|  | CYP24A1      | 0.152  | -0.296 | -1.346 |
|  | CBX8         | 0.154  | -0.387 | -1.624 |
|  | C20orf177    | 0.198  | -0.423 | -2.262 |
|  | B3GNT9       | 0.115  | -0.258 | -1.256 |
|  | OSGEPL1      | -0.04  | -0.674 | -3.682 |
|  | C3orf63      | -0.034 | -0.201 | -1.06  |
|  | SLC16A5      | -0.03  | -0.315 | -1.571 |
|  | LOC729983    | -0.042 | -0.562 | -2.798 |
|  | C3orf72      | -0.018 | -0.223 | -1.086 |
|  | FBXL4        | -0.061 | -0.265 | -1.285 |
|  | NARS2        | 0.024  | -0.294 | -1.522 |
|  | DLG3         | 0.063  | -0.495 | -2.722 |
|  | WDR35        | 0.011  | -0.242 | -1.211 |
|  | CDC7         | 0.008  | -0.509 | -2.473 |
|  | LOC286254    | 0.047  | -0.228 | -1.147 |
|  | HDHD2        | 0.044  | -0.265 | -1.383 |
|  | FZD8         | 0.103  | -0.598 | -3.084 |
|  | ZNF862       | 0.069  | -0.349 | -1.94  |
|  | S100PBP      | 0.059  | -0.25  | -1.425 |
|  | CHRNA1       | 0.05   | -0.217 | -1.178 |
|  | LOC100270746 | 0.14   | -0.456 | -2.517 |
|  | BCR          | 0.101  | -0.311 | -1.659 |
|  | TMEM129      | 0.096  | -0.365 | -1.992 |
|  | C3orf34      | 0.06   | -0.216 | -1.091 |
|  | AKR1A1       | 0.01   | -0.352 | -1.492 |
|  | ABCC5        | 0.023  | -0.597 | -2.471 |
|  | MTMR9L       | 0.027  | -0.264 | -1.156 |
|  | LOC100131564 | 0.035  | -0.469 | -2.154 |
|  | HERC2P4      | 0.038  | -0.362 | -1.602 |
|  | C18orf55     | 0.071  | -0.163 | -1.068 |
|  | MTIF2        | 0.084  | -0.257 | -1.695 |
|  | GTPBP3       | 0.06   | -0.238 | -1.504 |
|  | PRMT2        | 0.072  | -0.213 | -1.62  |
|  | MBLAC2       | 0.133  | -0.416 | -3.6   |
|  | TMTC4        | 0.093  | -0.159 | -1.317 |
|  | LIAS         | 0.114  | -0.212 | -1.705 |
|  | C1orf66      | 0.1    | -0.169 | -1.322 |
|  | MXN1         | 0.026  | -0.257 | -1.77  |
|  | C9orf150     | 0.085  | -0.448 | -3.072 |
|  | ZFP64        | 0.006  | -0.16  | -1.039 |
|  | REP15        | 0.122  | -0.019 | -1.411 |
|  | CLTCL1       | 0.106  | -0.036 | -1.535 |
|  | C6orf120     | 0.16   | -0.034 | -2.131 |
|  | MKNK2        | 0.116  | -0.021 | -1.125 |
|  | PANK1        | 0.136  | -0.053 | -1.35  |
|  | EPS8L2       | 0.145  | -0.043 | -1.253 |
|  | EIF2S2       | 0.172  | -0.049 | -1.09  |
|  | C12orf24     | 0.168  | -0.065 | -1.292 |
|  | CELSR2       | 0.149  | -0.105 | -1.65  |
|  | CAMK2G       | 0.09   | -0.116 | -1.225 |
|  | BMS1P1       | 0.082  | -0.085 | -1.026 |
|  | SMCR6        | 0.164  | -0.163 | -1.684 |
|  | RIN1         | 0.159  | -0.169 | -1.748 |
|  | NUDT6        | 0.216  | -0.234 | -2.198 |
|  | KIAA0430     | 0.104  | -0.125 | -1.063 |
|  | XYLT2        | 0.129  | -0.089 | -1.075 |
|  | TMEM19       | 0.264  | -0.224 | -1.539 |
|  | ANKRD50      | 0.216  | -0.183 | -1.14  |
|  | HISPPD1      | 0.231  | -0.246 | -1.782 |
|  | EID2B        | 0.118  | -0.142 | -1.025 |
|  | SLC35B4      | 0.356  | -0.319 | -2.464 |
|  | ARL3         | 0.163  | -0.129 | -1.072 |
|  | ZNF823       | 0.44   | -0.204 | -1.89  |
|  | CCDC25       | 0.24   | -0.142 | -1.129 |

|              |        |        |        |      |
|--------------|--------|--------|--------|------|
| STRADB       | -0.29  | -0.484 | -1.781 | Down |
| LOC100131138 | -0.323 | -0.505 | -1.926 | Down |
| POLR3B       | -0.265 | -0.451 | -1.575 | Down |
| ANKRD36      | -0.288 | -0.468 | -1.698 | Down |
| RNF26        | -0.16  | -0.321 | -1.051 | Down |
| HEATR3       | -0.41  | -0.749 | -2.431 | Down |
| EHD3         | -0.412 | -0.742 | -2.502 | Down |
| N6AMT1       | -0.333 | -0.59  | -2.004 | Down |
| HORMAD1      | -0.215 | -0.377 | -1.272 | Down |
| hCG_1993592  | -0.402 | -0.654 | -2.154 | Down |
| NUDT7        | -0.444 | -0.95  | -2.88  | Down |
| NR1H3        | -0.308 | -0.621 | -1.916 | Down |
| TFBIM        | -0.158 | -0.398 | -1.635 |      |
| ASCC1        | -0.212 | -0.458 | -1.975 |      |
| GTF3A        | -0.183 | -0.529 | -1.948 | Down |
| CLDN23       | -0.19  | -0.516 | -1.897 | Down |
| LOC340508    | -0.11  | -0.285 | -1.047 | Down |
| ACTR3C       | -0.19  | -0.465 | -1.689 | Down |
| USP18        | -0.257 | -0.692 | -2.538 | Down |
| PRAGMIN      | -0.122 | -0.345 | -1.267 | Down |
| FZD4         | -0.28  | -0.755 | -2.495 | Down |
| COQ5         | -0.158 | -0.474 | -1.537 | Down |
| ZFP14        | -0.222 | -0.628 | -2.001 | Down |
| TSEN2        | -0.192 | -0.536 | -1.686 | Down |
| RPUSD3       | -0.167 | -0.429 | -1.36  | Down |
| MEN1         | -0.18  | -0.43  | -1.416 | Down |
| LOC729678    | -0.254 | -0.625 | -2.078 | Down |
| WDR24        | -0.227 | -0.549 | -1.748 | Down |
| OXSM         | -0.141 | -0.58  | -2.082 |      |
| LYPLAL1      | -0.181 | -0.782 | -2.751 |      |
| BMPR2        | -0.081 | -0.44  | -1.592 |      |
| DPRXP4       | -0.115 | -0.7   | -3.057 |      |
| BTBD11       | -0.082 | -0.661 | -2.701 |      |
| ZBTB47       | -0.083 | -0.718 | -2.716 |      |
| TRIM66       | -0.153 | -0.534 | -2.13  |      |
| MAVS         | -0.142 | -0.452 | -1.887 |      |
| SCRN3        | -0.078 | -0.297 | -1.294 |      |
| JRKL         | -0.084 | -0.3   | -1.291 |      |
| PPP1R3D      | -0.213 | -0.397 | -1.578 | Down |
| PIK3C2B      | -0.448 | -0.806 | -3.245 | Down |
| MSL3L2       | -0.174 | -0.268 | -1.123 | Down |
| FAM45A       | -0.176 | -0.27  | -1.146 | Down |
| LOC284219    | -0.346 | -0.498 | -1.991 | Down |
| hCG_1986447  | -0.394 | -0.508 | -2.282 | Down |
| C9orf123     | -0.415 | -0.514 | -2.281 | Down |
| C12orf26     | -0.375 | -0.457 | -2.099 | Down |
| SNX33        | -0.351 | -0.401 | -1.93  | Down |
| C9orf9       | -0.167 | -0.183 | -1.076 |      |
| C2orf68      | -0.516 | -0.515 | -2.862 |      |
| ACOXL        | -0.307 | -0.316 | -1.812 |      |
| FAM177B      | -0.661 | -0.633 | -4.438 |      |
| DPY19L1P1    | -0.163 | -0.163 | -1.102 |      |
| STEAP2       | -0.199 | -0.368 | -1.81  |      |
| GPR135       | -0.223 | -0.352 | -1.704 |      |
| C11orf73     | -0.147 | -0.219 | -1.043 |      |
| ZNF837       | -0.172 | -0.224 | -1.098 |      |
| MRPS25       | -0.236 | -0.332 | -1.612 |      |
| RCCD1        | -0.186 | -0.257 | -1.422 |      |
| LOC344065    | -0.15  | -0.202 | -1.125 |      |
| PIN4         | -0.249 | -0.325 | -1.145 | Down |
| ARV1         | -0.395 | -0.524 | -1.828 | Down |
| LOC151162    | -0.422 | -0.557 | -2.058 | Down |
| ZNF500       | -0.37  | -0.537 | -1.792 | Down |
| C16orf75     | -0.231 | -0.323 | -1.064 | Down |
| RPTOR        | -0.217 | -0.288 | -1.103 | Down |
| PLXND1       | -0.207 | -0.28  | -1.084 | Down |
| COMMD3       | -0.218 | -0.28  | -1.126 | Down |
| DHFRL1       | -0.501 | -0.476 | -1.99  | Down |
| ANKRD27      | -0.276 | -0.284 | -1.174 | Down |
| ITPKB        | -0.529 | -0.596 | -2.301 | Down |
| C10orf41     | -0.519 | -0.552 | -2.09  | Down |
| SKP2         | 0.101  | -0.863 | -2.446 |      |
| SC65         | 0.075  | -0.549 | -1.529 |      |
| NAIP         | 0.03   | -0.373 | -1.082 |      |
| LOC642413    | 0.037  | -0.365 | -1.06  |      |
| FAM82B       | 0.066  | -0.497 | -1.542 |      |
| HEATR5A      | 0.066  | -1.022 | -2.525 |      |
| BTBD12       | 0.053  | -0.568 | -1.437 |      |
| TNFRSF1A     | 0.069  | -0.787 | -1.9   |      |
| RAP2B        | 0.039  | -0.564 | -1.531 |      |
| LOC284232    | 0.033  | -0.471 | -1.231 |      |
| ZNF30        | -0.015 | -1.056 | -2.95  | Down |
| ITGB4        | -0.015 | -0.651 | -1.77  | Down |
| FAM20C       | -0.044 | -0.905 | -2.493 | Down |
| CCDC101      | -0.001 | -0.599 | -1.591 | Down |
| C5orf24      | 0.007  | -0.434 | -1.166 |      |
| TCEAL8       | 0.012  | -0.545 | -1.575 |      |
| LGSN         | 0.005  | -0.544 | -1.567 |      |

|  |              |        |        |        |      |
|--|--------------|--------|--------|--------|------|
|  | ESYT2        | 0.017  | -0.659 | -1.86  |      |
|  | TBC1D14      | 0.031  | -0.463 | -1.31  |      |
|  | SYNPO        | 0.015  | -0.524 | -1.446 |      |
|  | PCYOX1       | -0.016 | -0.517 | -1.308 | Down |
|  | MRPS34       | -0.02  | -0.91  | -2.256 | Down |
|  | HLA-DMB      | -0.198 | -1.866 | -6.047 |      |
|  | GOLGA1       | -0.074 | -0.589 | -1.855 |      |
|  | ZCCHC24      | -0.071 | -0.567 | -1.739 | Down |
|  | RWDD2A       | -0.077 | -0.491 | -1.627 |      |
|  | LOC25845     | -0.054 | -0.405 | -1.391 |      |
|  | RARB         | 0.012  | -0.563 | -1.903 |      |
|  | GLRX         | -0.007 | -0.766 | -2.591 |      |
|  | MUCL1        | -0.006 | -0.4   | -1.229 |      |
|  | hCG_1776007  | -0.009 | -0.85  | -2.694 |      |
|  | DPYSL2       | -0.028 | -0.705 | -2.24  |      |
|  | BTN3A2       | -0.035 | -0.608 | -1.952 |      |
|  | PAR5         | -0.018 | -0.368 | -1.065 |      |
|  | MPG          | -0.03  | -0.508 | -1.543 |      |
|  | LOC728975    | 0.017  | -0.396 | -1.231 |      |
|  | MTR          | -0.18  | -0.721 | -1.938 | Down |
|  | C17orf90     | -0.191 | -0.752 | -1.972 | Down |
|  | THAP7        | -0.286 | -1.01  | -2.726 | Down |
|  | MFSB3        | -0.297 | -1.42  | -3.891 | Down |
|  | KCNQ3        | -0.102 | -0.462 | -1.261 | Down |
|  | TBL1Y        | -0.098 | -0.404 | -1.131 | Down |
|  | RNF141       | -0.096 | -0.49  | -1.511 | Down |
|  | HAUS1        | -0.107 | -0.466 | -1.417 | Down |
|  | PPA2         | -0.089 | -0.479 | -1.395 | Down |
|  | KCNJ6        | -0.207 | -1.098 | -3.157 | Down |
|  | BPGM         | -0.089 | -0.449 | -1.302 | Down |
|  | MRPS33       | -0.108 | -0.481 | -1.394 | Down |
|  | ZDHHC8       | -0.066 | -0.478 | -1.401 | Down |
|  | MIB1         | -0.108 | -0.722 | -2.077 | Down |
|  | FAM102A      | -0.223 | -0.853 | -2.508 | Down |
|  | DSCC1        | -0.182 | -0.682 | -1.981 | Down |
|  | RCAN3        | -0.133 | -0.421 | -1.267 | Down |
|  | IDH1         | -0.256 | -1.02  | -3.235 | Down |
|  | LOC100287820 | -0.117 | -0.41  | -1.302 | Down |
|  | FAM173A      | -0.102 | -0.353 | -1.143 | Down |
|  | LOC100130840 | -0.051 | -0.46  | -1.263 | Down |
|  | GLT8D1       | -0.063 | -0.497 | -1.366 | Down |
|  | SNPH         | -0.149 | -1.075 | -2.914 | Down |
|  | RAB40B       | -0.041 | -0.493 | -1.395 | Down |
|  | MMP15        | -0.069 | -0.875 | -2.422 | Down |
|  | PCP2         | -0.051 | -0.484 | -1.244 | Down |
|  | WNT5B        | -0.234 | -0.184 | -1.222 |      |
|  | ACTA2        | -0.214 | -0.165 | -1.165 |      |
|  | TRAK2        | -0.442 | -0.323 | -2.515 |      |
|  | LOC150381    | -0.242 | -0.181 | -1.544 |      |
|  | C9orf95      | -0.375 | -0.257 | -2.269 |      |
|  | PTPDC1       | -0.362 | -0.191 | -2.003 |      |
|  | CIRL         | -0.283 | -0.166 | -1.429 |      |
|  | C1orf195     | -0.305 | -0.121 | -1.23  |      |
|  | SLC7A11      | -0.259 | -0.065 | -1.056 |      |
|  | C10orf104    | -0.305 | -0.083 | -1.22  |      |
|  | UNQ1944      | -0.645 | -0.278 | -2.216 | Down |
|  | RNF187       | -0.354 | -0.193 | -1.189 | Down |
|  | MGC24103     | -0.624 | -0.348 | -2.167 | Down |
|  | TTC25        | -0.523 | -0.354 | -1.731 | Down |
|  | MGC16384     | -0.617 | -0.358 | -1.966 | Down |
|  | MOCOS        | -0.458 | -0.307 | -1.635 | Down |
|  | LOC100131089 | -0.324 | -0.251 | -1.276 | Down |
|  | CHURC1       | -0.24  | -0.178 | -1.021 | Down |
|  | ZNF573       | -0.536 | -0.423 | -1.945 | Down |
|  | CEP63        | 0.44   | -0.579 | -1.499 |      |
|  | FGG          | 0.304  | -0.499 | -1.137 |      |
|  | ELL2         | 0.324  | -0.497 | -1.174 |      |
|  | ZNF33A       | 0.24   | -0.376 | -1.008 |      |
|  | POU4F1       | 0.375  | -0.453 | -1.023 |      |
|  | CORO2A       | 0.784  | -1.035 | -2.12  |      |
|  | NDST2        | 0.33   | -0.741 | -1.251 |      |
|  | LOC730184    | 0.318  | -0.673 | -1.046 |      |
|  | NAT6         | 0.537  | -1.124 | -2.177 |      |
|  | FMOS         | 0.283  | -0.58  | -1.164 |      |
|  | LOC645101    | 0.249  | -0.562 | -1.045 |      |
|  | TMEM90B      | 0.406  | -0.983 | -1.991 |      |
|  | PLA2G4A      | 0.364  | -0.988 | -1.905 |      |
|  | SYT13        | 0.396  | -0.741 | -1.349 |      |
|  | RP5-1022P6.2 | 0.376  | -0.652 | -1.247 |      |
|  | NTN5         | 0.372  | -0.634 | -1.272 |      |
|  | KIAA0319     | 0.482  | -0.732 | -1.123 |      |
|  | CBR4         | 0.368  | -0.762 | -2.069 |      |
|  | STK16        | 0.254  | -0.606 | -1.406 |      |
|  | CCDC40       | 0.267  | -0.716 | -1.641 |      |
|  | SPRY1        | 0.161  | -0.397 | -1.012 |      |
|  | SLC39A11     | 0.143  | -0.436 | -1.062 |      |
|  | ZFYVE19      | 0.172  | -0.505 | -1.262 |      |
|  | PLCXD3       | 0.354  | -1.089 | -2.737 |      |

|              |        |        |        |      |
|--------------|--------|--------|--------|------|
| FAM129B      | 0.14   | -0.398 | -1.054 |      |
| GRB14        | 0.178  | -0.7   | -1.828 |      |
| C1orf35      | 0.182  | -0.645 | -1.717 |      |
| NAPEPLD      | 0.231  | -0.912 | -2.478 |      |
| MTMR15       | 0.154  | -0.57  | -1.54  |      |
| TARBP1       | 0.312  | -0.945 | -2.714 |      |
| PRDM12       | 0.162  | -0.568 | -1.662 |      |
| C11orf74     | 0.102  | -0.436 | -1.228 |      |
| PTPN3        | 0.064  | -0.5   | -1.11  |      |
| ANKS4B       | 0.076  | -0.667 | -1.487 | Down |
| NHLRC3       | 0.131  | -0.993 | -2.346 |      |
| NAV1         | 0.177  | -1.175 | -2.685 |      |
| BRSK2        | 0.075  | -0.418 | -1.075 |      |
| VPS36        | 0.13   | -0.668 | -1.612 |      |
| OCEL1        | 0.209  | -1.401 | -3.411 |      |
| TSKU         | 0.231  | -0.919 | -2.264 |      |
| SNX18        | 0.118  | -0.49  | -1.106 |      |
| HOXB6        | 0.266  | -1.041 | -2.224 |      |
| PTPN13       | 0.162  | -0.688 | -1.498 |      |
| NBEAL2       | 0.166  | -0.734 | -1.571 |      |
| ANXA13       | 0.362  | -1.647 | -3.492 |      |
| NR2F6        | 0.025  | -0.662 | -1.455 | Down |
| ICAM3        | 0.013  | -0.739 | -1.592 | Down |
| FOXS1        | 0.127  | -2.408 | -4.92  | Down |
| C4orf41      | 0.027  | -0.555 | -1.145 | Down |
| GNPTAB       | 0.035  | -0.595 | -1.19  | Down |
| RHOBTB2      | 0.117  | -1.22  | -2.504 | Down |
| DOK4         | 0.105  | -1.057 | -2.213 | Down |
| FAM161A      | 0.073  | -0.567 | -1.202 | Down |
| KCNN4        | 0.087  | -0.618 | -1.243 | Down |
| HPGD         | 0.185  | -1.229 | -2.457 | Down |
| ARHGEF16     | 0.115  | -0.856 | -1.717 | Down |
| STARD8       | 0.213  | -0.779 | -1.339 |      |
| BIVM         | 0.263  | -1.126 | -1.906 |      |
| OPHN1        | 0.319  | -0.949 | -1.648 |      |
| HOXB8        | 0.138  | -0.954 | -1.813 | Down |
| LRRK2        | 0.268  | -1.418 | -2.646 |      |
| MARCH2       | 0.085  | -0.574 | -1.028 |      |
| CAMK2D       | 0.114  | -0.548 | -1.063 |      |
| ADD3         | 0.182  | -0.809 | -1.564 |      |
| ADAL         | 0.171  | -0.718 | -1.417 |      |
| ALPK1        | 0.311  | -1.166 | -2.322 |      |
| ST6GAL2      | 0.195  | -0.832 | -1.517 |      |
| ADAMTS9      | 0.139  | -0.605 | -1.116 |      |
| RAP1GAP      | 0.399  | -0.432 | -1.526 |      |
| ZYG11B       | 0.28   | -0.299 | -1.023 |      |
| CTSL1        | 0.324  | -0.341 | -1.186 |      |
| MTIF3        | 0.389  | -0.367 | -1.273 |      |
| IQCD         | 0.378  | -0.328 | -1.183 |      |
| FILIP1       | 0.573  | -0.446 | -1.823 |      |
| SLITRK6      | 0.831  | -0.656 | -2.17  |      |
| LMO4         | 0.411  | -0.38  | -1.104 |      |
| CEP250       | 0.408  | -0.268 | -1.077 |      |
| CACNG6       | 0.493  | -0.28  | -1.281 |      |
| DBT          | 0.34   | -0.226 | -1.135 |      |
| ALS2CR8      | 0.476  | -0.338 | -1.572 |      |
| SLC35A5      | 0.321  | -0.232 | -1.198 |      |
| B3GNT1       | 0.517  | -0.318 | -1.837 |      |
| BBS2         | 0.41   | -0.353 | -1.63  |      |
| NOTCH4       | 0.322  | -0.172 | -1.084 |      |
| ADCY9        | 0.371  | -0.18  | -1.271 |      |
| DAG1         | 0.414  | -0.212 | -1.302 |      |
| NEBL         | 0.306  | -0.124 | -1.115 |      |
| PBXIP1       | 0.183  | -0.273 | -1.083 |      |
| C5orf45      | 0.205  | -0.3   | -1.207 |      |
| LIMD1        | 0.198  | -0.264 | -1.075 |      |
| hCG_1817306  | 0.158  | -0.222 | -1.05  |      |
| TNS4         | 0.527  | -0.823 | -2.489 |      |
| BDKRB2       | 0.518  | -0.898 | -2.626 |      |
| LOC220930    | 0.225  | -0.331 | -1.134 |      |
| KANK2        | 0.277  | -0.421 | -1.403 |      |
| TOP2B        | 0.297  | -0.421 | -1.318 |      |
| SLC7A2       | 0.312  | -0.396 | -1.33  |      |
| ZNF605       | 0.014  | 0.469  | -1.038 |      |
| NCRNA00169   | -0.049 | 0.294  | -1.019 |      |
| ATP13A5      | -0.156 | 0.451  | -1.063 |      |
| XBP1         | -0.221 | 0.208  | -1.168 |      |
| LOC346887    | -0.196 | 0.093  | -1.136 |      |
| PDE5A        | 0.261  | 0.414  | -1.231 |      |
| ANKRD29      | 0.249  | 0.354  | -1.645 |      |
| RFXAP        | 0.184  | 0.281  | -1.148 |      |
| ZNF302       | 0.329  | 0.417  | -1.754 |      |
| RPH3AL       | 0.252  | 0.315  | -1.384 |      |
| C15orf52     | 0.215  | 0.353  | -1.881 |      |
| GPX8         | -0.001 | 0.174  | -1.128 |      |
| LOC91450     | 0.052  | 0.085  | -1.322 |      |
| LOC100130093 | 0.024  | 0.069  | -1.146 |      |
| HDAC4        | 0.014  | 0.077  | -1.19  |      |



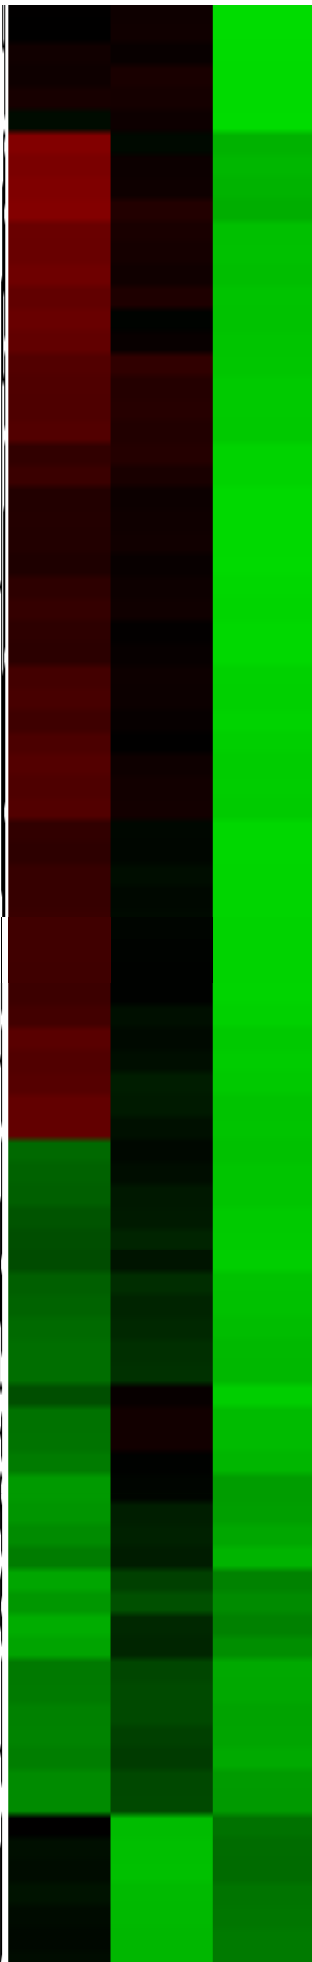

|              |        |        |        |
|--------------|--------|--------|--------|
| BBX          | 0.009  | 0.084  | -1.136 |
| PIK3R1       | 0.106  | 0.054  | -1.345 |
| SMARCA2      | 0.067  | 0.119  | -1.007 |
| RSPO3        | 0.11   | 0.103  | -1.045 |
| ANKRD5       | -0.07  | 0.081  | -1.323 |
| HMMR         | 0.811  | -0.06  | -1.11  |
| SDS          | 1.69   | 0.175  | -2.532 |
| PGM2L1       | 0.818  | 0.096  | -1.148 |
| HOXA11AS     | 0.77   | 0.205  | -1.024 |
| SMAD6        | 0.558  | 0.133  | -1.023 |
| ANG          | 0.579  | 0.118  | -1.078 |
| RAB27B       | 0.765  | 0.115  | -1.316 |
| NIN          | 0.521  | 0.166  | -1.052 |
| OBFC1        | 0.876  | -0.029 | -1.625 |
| HLTF         | 0.608  | 0.055  | -1.231 |
| DDIT4        | 0.862  | 0.508  | -2.067 |
| IGFBP1       | 0.429  | 0.197  | -1.091 |
| C12orf76     | 0.51   | 0.253  | -1.32  |
| PARD6A       | 0.488  | 0.199  | -1.188 |
| SFRP1        | 0.274  | 0.204  | -1.169 |
| ITPR1PL2     | 0.291  | 0.127  | -1.056 |
| PPARGC1B     | 0.28   | 0.102  | -1.774 |
| PABPC4L      | 0.224  | 0.096  | -1.369 |
| KLHL3        | 0.201  | 0.099  | -1.26  |
| CCDC111      | 0.18   | 0.051  | -1.266 |
| TRIM65       | 0.322  | 0.099  | -1.537 |
| LOC100129233 | 0.359  | 0.112  | -1.469 |
| THBD         | 0.374  | 0.029  | -1.765 |
| LRFN4        | 0.269  | 0.046  | -1.337 |
| PCMTD2       | 0.481  | 0.094  | -1.483 |
| ACN9         | 0.417  | 0.073  | -1.207 |
| CETN3        | 0.454  | 0.058  | -1.543 |
| PLD1         | 0.594  | 0.015  | -1.621 |
| SLC22A18AS   | 0.434  | 0.073  | -1.065 |
| RDH10        | 0.498  | 0.121  | -1.311 |
| ATP11A       | 0.424  | 0.1    | -1.042 |
| MIPOL1       | 0.273  | -0.043 | -1.197 |
| ANOS         | 0.307  | -0.044 | -1.454 |
| LETMD1       | 0.278  | -0.071 | -1.099 |
| C11orf86     | 0.69   | -0.106 | -2.709 |
| LOC344887    | 0.518  | -0.099 | -1.933 |
| IFT80        | 0.365  | -0.068 | -1.372 |
| FLJ27352     | 0.719  | -0.058 | -2.338 |
| GPRIN3       | 0.489  | -0.025 | -1.608 |
| FANCL        | 0.327  | -0.015 | -1.088 |
| LGR4         | 0.574  | -0.026 | -2.023 |
| SDPR         | 0.524  | -0.119 | -1.644 |
| TTC37        | 0.474  | -0.053 | -1.075 |
| MPHOSPH9     | 0.464  | -0.084 | -1.166 |
| LOC100128822 | 0.574  | -0.197 | -1.361 |
| FLRT3        | 0.56   | -0.149 | -1.116 |
| EHBP1L1      | 0.551  | -0.09  | -1.1   |
| SLC35B3      | -1.028 | -0.086 | -1.877 |
| LOC157860    | -1.033 | -0.138 | -2.069 |
| CHML         | -0.521 | -0.135 | -1.073 |
| SLC10A4      | -0.474 | -0.151 | -1.137 |
| CASP4        | -0.494 | -0.231 | -1.281 |
| CAD          | -0.38  | -0.101 | -1.04  |
| TMEM62       | -0.676 | -0.321 | -1.375 |
| NPM3         | -0.537 | -0.195 | -1.043 |
| CCDC92       | -0.638 | -0.241 | -1.134 |
| KCTD21       | -0.761 | -0.329 | -1.283 |
| GHRLOS       | -0.775 | -0.344 | -1.297 |
| PRDM13       | -0.42  | 0.038  | -1.102 |
| HPR          | -0.752 | 0.124  | -1.235 |
| FAM129A      | -1.323 | 0.208  | -2.157 |
| ARGFX        | -0.697 | -0.013 | -1.032 |
| PCDHB7       | -1.233 | -0.047 | -1.261 |
| LYSMD4       | -1.218 | -0.249 | -1.296 |
| C10orf79     | -1.249 | -0.303 | -1.506 |
| TMEM213      | -0.757 | -0.172 | -1.095 |
| MS4A10       | -1.011 | -0.39  | -0.796 |
| LOC727677    | -1.762 | -0.931 | -1.615 |
| FMNL3        | -1.021 | -0.241 | -0.763 |
| CD86         | -1.298 | -0.299 | -1.127 |
| PSD          | -1.019 | -0.592 | -1.42  |
| DEM1         | -1.404 | -0.851 | -1.926 |
| CAMSAP1      | -0.804 | -0.454 | -1.013 |
| C3AR1        | -0.801 | -0.392 | -1.004 |
| MAGEA8       | -0.862 | -0.405 | -1.16  |
| NDUFS2       | -1.028 | -0.537 | -1.147 |
| KIAA1659     | -1.018 | -0.535 | -1.122 |
| DECR2        | 0.006  | -1.068 | -0.65  |
| TM4SF20      | -0.273 | -3.483 | -1.969 |
| LOC731656    | -0.065 | -1.021 | -0.57  |
| RFX2         | -0.111 | -1.066 | -0.668 |
| CREB3L2      | -0.074 | -1.184 | -0.757 |
| SLC17A3      | -0.051 | -1.061 | -0.712 |

Down

|  |  |  |  |              |        |        |        |      |
|--|--|--|--|--------------|--------|--------|--------|------|
|  |  |  |  | PODXL2       | -0.073 | -1.047 | -0.702 |      |
|  |  |  |  | LOC401980    | 0.1    | -1.841 | -1.477 |      |
|  |  |  |  | DEC1         | 0.062  | -1.126 | -0.943 |      |
|  |  |  |  | PLCD4        | 0.172  | -1.64  | -1.341 |      |
|  |  |  |  | CD14         | 0.19   | -2.028 | -1.606 |      |
|  |  |  |  | UGT1A8       | 0.093  | -1.069 | -0.948 |      |
|  |  |  |  | ZDHHCS8P     | 0.125  | -2.484 | -2.309 |      |
|  |  |  |  | PRKAR2B      | 0.097  | -1.189 | -1.124 |      |
|  |  |  |  | SLC6A12      | 0.05   | -1.315 | -0.99  |      |
|  |  |  |  | LOC100134361 | 0.015  | -1.208 | -0.849 |      |
|  |  |  |  | PIGW         | -0.029 | -1.202 | -0.989 |      |
|  |  |  |  | HHAT         | -0.09  | -1.603 | -1.345 |      |
|  |  |  |  | PCSK4        | -0.141 | -1.155 | -0.968 |      |
|  |  |  |  | GMD5         | -0.156 | -1.518 | -1.253 |      |
|  |  |  |  | MAN1C1       | 0.198  | -1.134 | -0.78  |      |
|  |  |  |  | BTBD16       | 0.172  | -1.429 | -0.988 |      |
|  |  |  |  | SEMA3B       | 0.312  | -1.106 | -1.513 |      |
|  |  |  |  | AKR1B10      | 0.236  | -0.801 | -1.088 |      |
|  |  |  |  | PDE4B        | 0.311  | -1.028 | -1.468 |      |
|  |  |  |  | GDPD2        | 0.197  | -0.747 | -1.06  |      |
|  |  |  |  | PLCE1        | 0.247  | -1.021 | -1.29  |      |
|  |  |  |  | LPGAT1       | 0.177  | -0.857 | -1.01  |      |
|  |  |  |  | OAS1         | 0.434  | -2.157 | -2.931 |      |
|  |  |  |  | HSD11B1L     | 0.234  | -1.163 | -1.51  |      |
|  |  |  |  | PON1         | 0.114  | -0.789 | -1.031 |      |
|  |  |  |  | FANCI        | 0.119  | -0.792 | -1     |      |
|  |  |  |  | C9orf37      | 0.164  | -1.193 | -1.785 |      |
|  |  |  |  | C11orf71     | 0.198  | -1.523 | -2.245 |      |
|  |  |  |  | C2orf27A     | 0.113  | -1.077 | -1.531 |      |
|  |  |  |  | KIAA0101     | 0.132  | -0.99  | -1.354 |      |
|  |  |  |  | EHF          | 0.12   | -0.862 | -1.224 |      |
|  |  |  |  | MMD          | 0.11   | -0.885 | -1.418 |      |
|  |  |  |  | C19orf73     | 0.097  | -0.825 | -1.292 |      |
|  |  |  |  | MKRNIP6      | 0.217  | -1.29  | -2.119 |      |
|  |  |  |  | MAP3K12      | 0.287  | -1.396 | -2.158 |      |
|  |  |  |  | THSD7A       | -0.053 | -1.721 | -2.41  |      |
|  |  |  |  | HYAL2        | -0.03  | -1.252 | -1.746 |      |
|  |  |  |  | CCDC80       | -0.052 | -1.741 | -2.533 |      |
|  |  |  |  | SOX21        | -0.128 | -2.29  | -3.183 |      |
|  |  |  |  | PEX1         | 0.026  | -1.245 | -1.705 |      |
|  |  |  |  | AKR1B15      | 0.019  | -0.911 | -1.267 |      |
|  |  |  |  | SCRN2        | -0.095 | -0.971 | -1.307 |      |
|  |  |  |  | GLE1         | -0.116 | -1.098 | -1.461 |      |
|  |  |  |  | LOC92973     | -0.092 | -0.972 | -1.386 |      |
|  |  |  |  | IL1R1        | -0.08  | -0.806 | -1.155 |      |
|  |  |  |  | PHF11        | -0.1   | -0.917 | -1.327 | Down |
|  |  |  |  | FAM162A      | -0.111 | -0.919 | -1.355 | Down |
|  |  |  |  | SPATA7       | -0.188 | -1.632 | -2.428 | Down |
|  |  |  |  | SCARA3       | -0.088 | -0.994 | -1.483 | Down |
|  |  |  |  | PTGFRN       | -0.124 | -1.345 | -1.997 | Down |
|  |  |  |  | tcag7.1196   | -0.118 | -1.332 | -2.038 | Down |
|  |  |  |  | ITPR1        | -0.077 | -1.071 | -1.659 | Down |
|  |  |  |  | SKAP1        | -0.076 | -0.767 | -1.177 | Down |
|  |  |  |  | ABCB9        | -0.106 | -0.943 | -1.438 | Down |
|  |  |  |  | SYTL2        | -0.243 | -1.725 | -2.719 | Down |
|  |  |  |  | SESTD1       | -0.137 | -0.948 | -1.494 | Down |
|  |  |  |  | EPHX1        | -0.119 | -0.794 | -1.239 | Down |
|  |  |  |  | C1orf21      | -0.124 | -1.114 | -1.767 | Down |
|  |  |  |  | SLC12A2      | -0.17  | -1.009 | -1.553 | Down |
|  |  |  |  | RASGEF1A     | -0.141 | -0.797 | -1.251 | Down |
|  |  |  |  | SLC40A1      | -0.054 | -1.514 | -2.509 | Down |
|  |  |  |  | KLHL13       | -0.022 | -0.734 | -1.226 | Down |
|  |  |  |  | SLC46A3      | -0.045 | -0.805 | -1.351 | Down |
|  |  |  |  | NNMT         | -0.136 | -2.317 | -3.8   | Down |
|  |  |  |  | ZNF248       | -0.038 | -0.863 | -1.384 | Down |
|  |  |  |  | CXorf66      | -0.023 | -0.727 | -1.164 | Down |
|  |  |  |  | TMEM160      | -0.029 | -0.789 | -1.205 |      |
|  |  |  |  | SLC25A28     | -0.034 | -0.764 | -1.182 | Down |
|  |  |  |  | ADSSL1       | -0.012 | -1.271 | -1.93  |      |
|  |  |  |  | TC2N         | 0.004  | -1.613 | -2.502 |      |
|  |  |  |  | OSTbeta      | 0.012  | -1.953 | -3.098 |      |
|  |  |  |  | GABRB3       | 0.032  | -1.864 | -2.914 |      |
|  |  |  |  | DCAF17       | 0.025  | -0.673 | -1.058 |      |
|  |  |  |  | C1QTNF6      | 0.137  | -1.725 | -3.029 | Down |
|  |  |  |  | ARHGAP26     | 0.069  | -1.195 | -2.062 | Down |
|  |  |  |  | PPM1M        | 0.091  | -1.169 | -1.975 |      |
|  |  |  |  | IFT81        | 0.066  | -0.945 | -1.598 |      |
|  |  |  |  | PPFIBP2      | 0.032  | -0.757 | -1.257 |      |
|  |  |  |  | PDGFRL       | 0.042  | -0.749 | -1.219 |      |
|  |  |  |  | ORC1L        | 0.075  | -0.595 | -1.012 |      |
|  |  |  |  | MAN1A2       | 0.068  | -0.662 | -1.125 |      |
|  |  |  |  | KIAA0528     | 0.029  | -0.923 | -1.64  | Down |
|  |  |  |  | ANKMY2       | 0.009  | -0.761 | -1.357 | Down |
|  |  |  |  | KDELC1       | -0.002 | -1.069 | -1.851 | Down |
|  |  |  |  | CUEDC2       | 0.002  | -0.596 | -1.016 | Down |
|  |  |  |  | SSPN         | 0.007  | -0.736 | -1.261 | Down |
|  |  |  |  | RHOQ         | 0.019  | -0.906 | -1.525 | Down |
|  |  |  |  | RHOV         | 0.019  | -2.128 | -3.49  | Down |

|  |  |  |  |              |        |        |        |
|--|--|--|--|--------------|--------|--------|--------|
|  |  |  |  | MATN2        | 0.104  | -1.429 | -1.546 |
|  |  |  |  | FAM108A1     | 0.061  | -1.003 | -1.164 |
|  |  |  |  | C14orf132    | 0.087  | -1.897 | -2.153 |
|  |  |  |  | GALNT11      | 0.123  | -1.368 | -1.71  |
|  |  |  |  | PPIL3        | 0.076  | -1.118 | -1.421 |
|  |  |  |  | PDE1A        | 0.083  | -1.333 | -1.703 |
|  |  |  |  | SLC26A9      | 0.043  | -1.501 | -1.952 |
|  |  |  |  | SIDT1        | 0.089  | -2.485 | -3.214 |
|  |  |  |  | PTGR1        | 0.004  | -0.901 | -1.118 |
|  |  |  |  | AKR1B1       | 0.034  | -0.892 | -1.094 |
|  |  |  |  | HNRNPA1      | -0.058 | -1.024 | -1.231 |
|  |  |  |  | CA12         | -0.091 | -1.206 | -1.422 |
|  |  |  |  | FANK1        | -0.056 | -0.995 | -1.164 |
|  |  |  |  | DCDC2        | -0.076 | -1.308 | -1.509 |
|  |  |  |  | C20orf46     | -0.041 | -1.64  | -1.981 |
|  |  |  |  | ALDH7A1      | -0.009 | -1.375 | -1.607 |
|  |  |  |  | C20orf96     | -0.022 | -0.869 | -1.005 |
|  |  |  |  | ADCK4        | -0.045 | -1.133 | -1.316 |
|  |  |  |  | GPX2         | -0.17  | -2.679 | -3.311 |
|  |  |  |  | C21orf84     | -0.121 | -1.439 | -1.765 |
|  |  |  |  | CRYAB        | -0.182 | -2.456 | -3.122 |
|  |  |  |  | SGCD         | -0.072 | -2.081 | -2.6   |
|  |  |  |  | LACE1        | -0.031 | -1.113 | -1.42  |
|  |  |  |  | LOC729970    | -0.217 | -1.705 | -1.787 |
|  |  |  |  | HYAL1        | -0.183 | -1.333 | -1.404 |
|  |  |  |  | GTF2I        | -0.14  | -1.172 | -1.207 |
|  |  |  |  | C18orf1      | -0.192 | -1.781 | -1.834 |
|  |  |  |  | CYB5A        | -0.129 | -1.44  | -1.496 |
|  |  |  |  | CDK5         | -0.105 | -1.43  | -1.509 |
|  |  |  |  | LRP4         | -0.174 | -1.541 | -1.7   |
|  |  |  |  | ACCN2        | -0.121 | -0.964 | -1.062 |
|  |  |  |  | ATP8A1       | -0.147 | -1.417 | -1.578 |
|  |  |  |  | VSTM2L       | -0.174 | -1.86  | -2.11  |
|  |  |  |  | MBOAT2       | -0.084 | -0.869 | -1.007 |
|  |  |  |  | ROM1         | -0.129 | -1.041 | -1.195 |
|  |  |  |  | TP63         | -0.228 | -1.149 | -1.233 |
|  |  |  |  | MAGED1       | -0.27  | -1.46  | -1.569 |
|  |  |  |  | C10orf58     | -0.191 | -1.059 | -1.128 |
|  |  |  |  | PEBP1        | -0.177 | -1.067 | -1.14  |
|  |  |  |  | FGB          | -0.176 | -1.204 | -1.307 |
|  |  |  |  | ALDH5A1      | -0.215 | -1.437 | -1.567 |
|  |  |  |  | MKL2         | -0.2   | -1.126 | -1.075 |
|  |  |  |  | GALM         | -0.458 | -2.873 | -2.671 |
|  |  |  |  | UGT2B11      | -0.164 | -1.102 | -1.058 |
|  |  |  |  | OMA1         | -0.341 | -2.074 | -2.045 |
|  |  |  |  | KCNK3        | -0.168 | -1.19  | -1.186 |
|  |  |  |  | SLC27A5      | -0.105 | -1.116 | -1.075 |
|  |  |  |  | METTL7A      | -0.223 | -2.111 | -1.958 |
|  |  |  |  | LOC282997    | -0.015 | -1.484 | -1.491 |
|  |  |  |  | FAM131B      | -0.003 | -1.645 | -1.671 |
|  |  |  |  | NOTCH3       | -0.056 | -1.735 | -1.745 |
|  |  |  |  | EPB49        | -0.016 | -1.031 | -1.126 |
|  |  |  |  | LOC100132707 | 0.319  | -0.762 | -1.037 |
|  |  |  |  | DBP          | 0.736  | -1.514 | -2.031 |
|  |  |  |  | STAT1        | 0.338  | -0.994 | -1.164 |
|  |  |  |  | CNNM1        | 0.313  | -0.99  | -1.175 |
|  |  |  |  | LOC100133487 | 0.411  | -1.446 | -1.625 |
|  |  |  |  | CCDC89       | 0.286  | -0.905 | -1.002 |
|  |  |  |  | RAC3         | 0.302  | -1.184 | -1.07  |
|  |  |  |  | LOC727938    | 0.295  | -1.699 | -1.695 |
|  |  |  |  | SLC1A7       | 0.413  | -1.192 | -1.131 |
|  |  |  |  | CP           | 0.462  | -1.053 | -1.021 |
|  |  |  |  | MUDENG       | -0.283 | -1.143 | -0.865 |
|  |  |  |  | C9orf116     | -0.549 | -2.007 | -1.524 |
|  |  |  |  | LOC100128163 | -0.314 | -1.085 | -0.832 |
|  |  |  |  | SLC23A1      | -0.495 | -1.681 | -1.275 |
|  |  |  |  | GALNT12      | -0.604 | -2.13  | -1.591 |
|  |  |  |  | RSPH1        | -0.307 | -1.04  | -0.748 |
|  |  |  |  | TIMP4        | -0.232 | -1.007 | -0.835 |
|  |  |  |  | LOC93463     | -0.276 | -1.019 | -0.846 |
|  |  |  |  | PRR3         | -0.395 | -1.617 | -1.303 |
|  |  |  |  | NOTCH2       | -0.385 | -1.52  | -1.226 |
|  |  |  |  | DHCR7        | -0.4   | -1.644 | -1.317 |
|  |  |  |  | KLHDC9       | -0.671 | -2.498 | -1.993 |
|  |  |  |  | CAT          | -0.239 | -1.647 | -1.315 |
|  |  |  |  | CD24         | -0.411 | -2.161 | -1.656 |
|  |  |  |  | ABCC6        | -0.202 | -1.104 | -0.836 |
|  |  |  |  | SPON2        | -0.207 | -1.178 | -0.913 |
|  |  |  |  | ITGA11       | -0.202 | -1.144 | -0.915 |
|  |  |  |  | INO80B       | -0.283 | -1.853 | -1.623 |
|  |  |  |  | TNFRSF21     | -0.215 | -1.128 | -1.02  |
|  |  |  |  | CRYM         | -0.728 | -3.923 | -3.41  |
|  |  |  |  | MOSPD3       | -0.334 | -1.356 | -1.215 |
|  |  |  |  | FRAS1        | -0.416 | -1.65  | -1.484 |
|  |  |  |  | RILP         | -0.299 | -1.135 | -1.041 |
|  |  |  |  | LAD1         | -0.549 | -2.221 | -2.059 |
|  |  |  |  | IGBP1        | -0.338 | -1.407 | -1.302 |
|  |  |  |  | NTRK3        | -0.56  | -2.544 | -2.218 |

|  |  |  |  |  |              |        |        |        |      |
|--|--|--|--|--|--------------|--------|--------|--------|------|
|  |  |  |  |  | CCND3        | -0.335 | -1.453 | -1.262 |      |
|  |  |  |  |  | SUMF1        | -0.269 | -1.195 | -1.055 |      |
|  |  |  |  |  | TRIM29       | -0.361 | -1.562 | -1.393 |      |
|  |  |  |  |  | LOC401630    | -0.267 | -1.173 | -1.068 |      |
|  |  |  |  |  | SOX2         | -0.248 | -1.187 | -1.143 |      |
|  |  |  |  |  | TMEM149      | -0.534 | -2.196 | -2.08  |      |
|  |  |  |  |  | ASB9         | -0.349 | -1.469 | -1.41  |      |
|  |  |  |  |  | VSIG10L      | -0.539 | -2.225 | -2.164 |      |
|  |  |  |  |  | GALNTL1      | -0.234 | -1.009 | -0.997 |      |
|  |  |  |  |  | ENPP1        | -0.274 | -1.166 | -1.158 |      |
|  |  |  |  |  | PLD5         | -0.328 | -1.341 | -1.37  |      |
|  |  |  |  |  | PLAT         | -0.549 | -2.118 | -2.114 |      |
|  |  |  |  |  | LLGL2        | -0.288 | -1.023 | -1.023 |      |
|  |  |  |  |  | ENTPD2       | -0.261 | -1.268 | -1.295 |      |
|  |  |  |  |  | KCTD17       | -0.64  | -1.737 | -1.565 |      |
|  |  |  |  |  | HCFC1R1      | -0.388 | -1.018 | -0.922 |      |
|  |  |  |  |  | NECAB3       | -0.423 | -1.133 | -1.003 |      |
|  |  |  |  |  | LOC402779    | -0.434 | -1.163 | -1.028 |      |
|  |  |  |  |  | TMEM97       | -0.534 | -1.475 | -1.374 |      |
|  |  |  |  |  | LOC100133145 | -0.436 | -1.2   | -1.117 |      |
|  |  |  |  |  | THTPA        | -0.512 | -1.386 | -1.351 |      |
|  |  |  |  |  | SLC25A29     | -0.707 | -1.859 | -1.79  |      |
|  |  |  |  |  | FGD5         | -0.627 | -1.659 | -1.589 |      |
|  |  |  |  |  | ICK          | -0.787 | -2.025 | -1.994 |      |
|  |  |  |  |  | GGT5         | -0.424 | -1.07  | -1.027 |      |
|  |  |  |  |  | SNAP25       | -0.655 | -1.737 | -1.736 |      |
|  |  |  |  |  | ANXA6        | -1.043 | -3.439 | -2.974 |      |
|  |  |  |  |  | LOC388242    | -0.621 | -1.813 | -1.599 |      |
|  |  |  |  |  | ACY1         | -0.451 | -1.39  | -1.246 |      |
|  |  |  |  |  | HSP90AA2     | -0.476 | -1.446 | -1.22  |      |
|  |  |  |  |  | FADS2        | -0.434 | -1.354 | -1.117 |      |
|  |  |  |  |  | TLE2         | -0.383 | -1.204 | -1.108 |      |
|  |  |  |  |  | SLC5A11      | -0.647 | -2.108 | -1.935 |      |
|  |  |  |  |  | KIF12        | -0.707 | -2.315 | -2.154 |      |
|  |  |  |  |  | FBN2         | -1.022 | -3.554 | -3.264 |      |
|  |  |  |  |  | DMRTC1       | -0.452 | -1.334 | -1.285 |      |
|  |  |  |  |  | C9orf3       | -0.467 | -1.45  | -1.367 |      |
|  |  |  |  |  | LOC646976    | -0.633 | -1.341 | -1.187 |      |
|  |  |  |  |  | FUZ          | -0.668 | -1.44  | -1.279 |      |
|  |  |  |  |  | DPYSL5       | -1.25  | -2.783 | -2.439 |      |
|  |  |  |  |  | TSTA3        | -0.885 | -1.84  | -1.611 |      |
|  |  |  |  |  | C17orf62     | -0.79  | -1.676 | -1.436 |      |
|  |  |  |  |  | MYD88        | -0.564 | -1.124 | -0.995 |      |
|  |  |  |  |  | DHFR         | -0.564 | -1.139 | -1.027 |      |
|  |  |  |  |  | MRAP2        | -1.437 | -3.447 | -3.231 |      |
|  |  |  |  |  | HSPB1        | -0.449 | -1.088 | -0.997 |      |
|  |  |  |  |  | SLC1A1       | -0.741 | -1.692 | -1.612 | Down |
|  |  |  |  |  | RAB26        | -0.865 | -1.999 | -1.933 | Down |
|  |  |  |  |  | GYG2         | -0.883 | -2.052 | -1.84  |      |
|  |  |  |  |  | GHDC         | -0.444 | -1.048 | -0.953 |      |
|  |  |  |  |  | RNF144B      | -0.462 | -1.069 | -0.995 | Down |
|  |  |  |  |  | ZWINT        | -0.494 | -1.084 | -1.001 | Down |
|  |  |  |  |  | RASSF5       | -0.578 | -1.279 | -1.16  | Down |
|  |  |  |  |  | NCALD        | -0.496 | -1.113 | -1.025 | Down |
|  |  |  |  |  | SRD5A3       | -0.704 | -1.387 | -1.342 | Down |
|  |  |  |  |  | SLC25A10     | -0.955 | -1.919 | -1.818 | Down |
|  |  |  |  |  | RECQL4       | -1.038 | -2.005 | -1.945 | Down |
|  |  |  |  |  | CAND2        | -0.862 | -1.709 | -1.665 | Down |
|  |  |  |  |  | WDR54        | -0.76  | -1.501 | -1.479 | Down |
|  |  |  |  |  | SLFN11       | -1.736 | -3.334 | -3.308 | Down |
|  |  |  |  |  | PCDHB11      | -0.514 | -1.1   | -1.036 | Down |
|  |  |  |  |  | FH           | -0.502 | -1.058 | -1.015 | Down |
|  |  |  |  |  | ASL          | -0.602 | -1.261 | -1.187 | Down |
|  |  |  |  |  | ADPRHL1      | -1.171 | -2.394 | -2.236 | Down |
|  |  |  |  |  | CGNL1        | -0.866 | -2.218 | -1.878 |      |
|  |  |  |  |  | CCDC24       | -0.512 | -1.296 | -1.103 |      |
|  |  |  |  |  | TMEM141      | -0.466 | -1.154 | -0.972 |      |
|  |  |  |  |  | ERBB3        | -0.692 | -1.757 | -1.486 |      |
|  |  |  |  |  | GAMT         | -0.579 | -1.534 | -1.304 |      |
|  |  |  |  |  | BPHL         | -0.554 | -1.481 | -1.243 |      |
|  |  |  |  |  | NEURL2       | -0.565 | -1.424 | -1.165 |      |
|  |  |  |  |  | EML4         | -0.541 | -1.341 | -1.103 |      |
|  |  |  |  |  | PACSIN1      | -1.572 | -3.701 | -3.079 |      |
|  |  |  |  |  | CBLN2        | -0.96  | -2.24  | -1.87  |      |
|  |  |  |  |  | CRELD2       | -0.469 | -1.115 | -0.896 |      |
|  |  |  |  |  | NUP133       | -0.391 | -1.137 | -0.922 |      |
|  |  |  |  |  | LOC339807    | -0.366 | -1.023 | -0.83  |      |
|  |  |  |  |  | HSP90AA1     | -0.507 | -1.411 | -1.138 |      |
|  |  |  |  |  | NAMPT        | -0.682 | -1.933 | -1.508 |      |
|  |  |  |  |  | FAM105A      | -0.382 | -1.055 | -0.817 |      |
|  |  |  |  |  | OSBPL9       | -0.489 | -1.335 | -1.002 |      |
|  |  |  |  |  | SLC44A3      | -0.833 | -1.852 | -1.415 |      |
|  |  |  |  |  | ABCD3        | -0.564 | -1.233 | -0.92  |      |
|  |  |  |  |  | NDRG4        | -1.315 | -3.083 | -2.298 |      |
|  |  |  |  |  | SLC29A4      | -0.438 | -1.005 | -0.726 |      |
|  |  |  |  |  | FLJ37798     | -0.926 | -2.243 | -1.584 |      |
|  |  |  |  |  | FNTB         | -0.582 | -1.194 | -0.946 |      |
|  |  |  |  |  | DDC          | -1.132 | -2.401 | -1.87  |      |

|  |  |  |  |  |           |        |        |        |      |
|--|--|--|--|--|-----------|--------|--------|--------|------|
|  |  |  |  |  | C19orf23  | -0.597 | -1.243 | -0.971 |      |
|  |  |  |  |  | NDN       | -0.517 | -1.13  | -0.913 |      |
|  |  |  |  |  | TM4SF5    | -0.3   | -1.273 | -0.824 |      |
|  |  |  |  |  | SEPW1     | -0.356 | -1.706 | -1.035 |      |
|  |  |  |  |  | C5orf35   | -0.275 | -1.112 | -0.669 |      |
|  |  |  |  |  | HLF       | -0.323 | -1.637 | -1.131 |      |
|  |  |  |  |  | NFKBIZ    | -0.26  | -1.195 | -0.657 |      |
|  |  |  |  |  | HJURP     | -0.225 | -1.13  | -0.578 |      |
|  |  |  |  |  | FLJ40125  | -0.344 | -1.775 | -0.972 |      |
|  |  |  |  |  | AP4M1     | -0.185 | -1.081 | -0.588 |      |
|  |  |  |  |  | MFSD4     | -0.35  | -1.253 | -0.682 |      |
|  |  |  |  |  | MAN2B2    | -0.38  | -1.347 | -0.723 |      |
|  |  |  |  |  | LOC643988 | -0.591 | -1.953 | -1.175 |      |
|  |  |  |  |  | LOC285577 | -0.458 | -1.441 | -0.887 |      |
|  |  |  |  |  | MEIG1     | -0.414 | -1.252 | -0.795 |      |
|  |  |  |  |  | FGGY      | -0.492 | -1.531 | -0.978 |      |
|  |  |  |  |  | LOC553137 | -0.812 | -2.333 | -1.511 |      |
|  |  |  |  |  | U2AF1     | -0.412 | -1.055 | -0.691 |      |
|  |  |  |  |  | PHTF1     | -0.603 | -1.608 | -1.105 |      |
|  |  |  |  |  | PCOLCE    | -0.564 | -1.537 | -1.024 |      |
|  |  |  |  |  | KIAA0317  | -0.386 | -1.04  | -0.701 |      |
|  |  |  |  |  | PLSCR3    | -0.364 | -1.157 | -0.789 |      |
|  |  |  |  |  | LOC728392 | -0.636 | -2.284 | -1.536 |      |
|  |  |  |  |  | RNF125    | -0.308 | -1.072 | -0.733 |      |
|  |  |  |  |  | LOC285501 | -0.494 | -1.659 | -1.137 |      |
|  |  |  |  |  | ZNF219    | -0.236 | -0.783 | -1.018 | Down |
|  |  |  |  |  | LPPR3     | -0.264 | -0.919 | -1.205 | Down |
|  |  |  |  |  | CCDC106   | -0.612 | -1.99  | -2.616 | Down |
|  |  |  |  |  | SEPT6     | -0.394 | -1.244 | -1.666 | Down |
|  |  |  |  |  | FAM175A   | -0.708 | -2.268 | -2.901 | Down |
|  |  |  |  |  | C10orf10  | -0.349 | -1.11  | -1.426 | Down |
|  |  |  |  |  | TMEM143   | -0.585 | -1.767 | -2.233 | Down |
|  |  |  |  |  | PHEX      | -0.472 | -1.552 | -1.854 | Down |
|  |  |  |  |  | KIAA0146  | -0.272 | -0.874 | -1.033 | Down |
|  |  |  |  |  | MED25     | -0.266 | -0.83  | -1.01  | Down |
|  |  |  |  |  | C12orf27  | -1.006 | -3.096 | -3.816 | Down |
|  |  |  |  |  | SUOX      | -0.556 | -1.863 | -2.287 | Down |
|  |  |  |  |  | LQK1      | -0.542 | -1.864 | -2.238 | Down |
|  |  |  |  |  | VASH2     | -0.37  | -1.31  | -1.598 | Down |
|  |  |  |  |  | NAGPA     | -0.34  | -0.849 | -1.095 | Down |
|  |  |  |  |  | CNPY4     | -0.386 | -0.954 | -1.229 | Down |
|  |  |  |  |  | ZCWPW1    | -0.692 | -1.67  | -2.171 | Down |
|  |  |  |  |  | PRRC1     | -0.466 | -1.15  | -1.519 | Down |
|  |  |  |  |  | GALNT4    | -0.68  | -1.623 | -2.141 | Down |
|  |  |  |  |  | ZNF581    | -0.476 | -1.13  | -1.448 | Down |
|  |  |  |  |  | RAB37     | -0.915 | -2.259 | -2.852 | Down |
|  |  |  |  |  | LRRRC8D   | -0.686 | -1.493 | -1.963 | Down |
|  |  |  |  |  | IFT122    | -0.435 | -0.948 | -1.253 | Down |
|  |  |  |  |  | EEF2      | -0.397 | -0.874 | -1.157 | Down |
|  |  |  |  |  | CYP2U1    | -0.906 | -2.014 | -2.67  | Down |
|  |  |  |  |  | SYT11     | -0.573 | -1.531 | -1.982 | Down |
|  |  |  |  |  | POP7      | -0.353 | -0.911 | -1.175 | Down |
|  |  |  |  |  | PAPSS1    | -0.374 | -1.015 | -1.305 | Down |
|  |  |  |  |  | MYO1F     | -0.47  | -1.264 | -1.629 | Down |
|  |  |  |  |  | GOLSYN    | -0.817 | -2.145 | -2.851 | Down |
|  |  |  |  |  | GNAI2     | -0.332 | -0.857 | -1.125 | Down |
|  |  |  |  |  | SFMBT2    | -0.546 | -1.475 | -1.941 | Down |
|  |  |  |  |  | LIG1      | -0.584 | -1.622 | -2.047 | Down |
|  |  |  |  |  | LDHD      | -0.492 | -1.372 | -1.713 | Down |
|  |  |  |  |  | C6orf165  | -0.289 | -0.806 | -1.013 | Down |
|  |  |  |  |  | ARMC7     | -0.294 | -0.848 | -1.054 | Down |
|  |  |  |  |  | CYB5D2    | -0.313 | -0.849 | -1.073 | Down |
|  |  |  |  |  | ACAT2     | -0.565 | -1.526 | -1.972 | Down |
|  |  |  |  |  | SETBP1    | -1.018 | -2.844 | -3.567 | Down |
|  |  |  |  |  | TIAM1     | -0.583 | -1.52  | -1.769 | Down |
|  |  |  |  |  | SLCO2B1   | -0.478 | -1.234 | -1.464 | Down |
|  |  |  |  |  | PHKA2     | -0.513 | -1.332 | -1.604 | Down |
|  |  |  |  |  | KRT4      | -0.778 | -2.06  | -2.449 | Down |
|  |  |  |  |  | FLJ10357  | -0.494 | -1.242 | -1.529 | Down |
|  |  |  |  |  | EIF2AK1   | -0.376 | -0.931 | -1.16  | Down |
|  |  |  |  |  | CDK5RAP3  | -0.418 | -1.105 | -1.35  | Down |
|  |  |  |  |  | C17orf97  | -1.381 | -3.522 | -4.284 | Down |
|  |  |  |  |  | SLC4A11   | -0.605 | -1.482 | -1.791 | Down |
|  |  |  |  |  | RDX       | -0.418 | -0.997 | -1.221 | Down |
|  |  |  |  |  | HOXA13    | -0.367 | -0.891 | -1.245 | Down |
|  |  |  |  |  | ACCS      | -0.548 | -1.361 | -1.903 | Down |
|  |  |  |  |  | SNX21     | -0.521 | -1.327 | -1.846 | Down |
|  |  |  |  |  | USH1C     | -0.527 | -1.423 | -1.93  | Down |
|  |  |  |  |  | RASSF4    | -0.823 | -2.158 | -2.913 | Down |
|  |  |  |  |  | PLCD1     | -0.843 | -2.24  | -3.039 | Down |
|  |  |  |  |  | PECR      | -0.388 | -1.014 | -1.393 | Down |
|  |  |  |  |  | ETV2      | -0.409 | -1.062 | -1.447 | Down |
|  |  |  |  |  | DAK       | -0.371 | -0.987 | -1.341 | Down |
|  |  |  |  |  | MORC4     | -0.991 | -2.386 | -3.205 | Down |
|  |  |  |  |  | FCRLB     | -0.391 | -0.954 | -1.29  | Down |
|  |  |  |  |  | DPYSL3    | -0.709 | -1.795 | -2.406 | Down |
|  |  |  |  |  | DHRS1     | -0.559 | -1.348 | -1.83  | Down |
|  |  |  |  |  | ZNF691    | -0.298 | -0.88  | -1.169 | Down |

|              |        |        |        |      |
|--------------|--------|--------|--------|------|
| THYN1        | -0.74  | -2.158 | -2.906 | Down |
| NAT1         | -0.603 | -1.715 | -2.295 | Down |
| LOC388588    | -0.444 | -1.227 | -1.699 | Down |
| KRTAP19-8    | -0.612 | -1.712 | -2.422 | Down |
| STAT4        | -0.507 | -1.268 | -1.813 | Down |
| PLEKHG4      | -0.628 | -1.621 | -2.348 | Down |
| FBXO9        | -0.654 | -1.702 | -2.441 | Down |
| FAH          | -0.295 | -0.754 | -1.087 | Down |
| PBLD         | -0.349 | -0.818 | -1.196 | Down |
| C15orf58     | -0.557 | -1.314 | -1.9   | Down |
| TLE6         | -0.466 | -1.14  | -1.665 | Down |
| PTOV1        | -0.371 | -1.14  | -1.175 |      |
| CCT3         | -0.375 | -1.185 | -1.23  |      |
| MNS1         | -0.807 | -2.571 | -2.553 |      |
| EPHX2        | -0.777 | -2.518 | -2.692 |      |
| C17orf70     | -0.323 | -1.08  | -1.148 |      |
| LOC100130906 | -0.365 | -1.261 | -1.312 |      |
| PCSK1        | -0.455 | -1.315 | -1.421 | Down |
| DZIP3        | -0.376 | -1.08  | -1.189 | Down |
| CYP2S1       | -0.43  | -1.214 | -1.321 | Down |
| C19orf57     | -0.358 | -1.042 | -1.128 | Down |
| SLC22A3      | -0.87  | -2.388 | -2.654 | Down |
| GMPPA        | -0.903 | -2.47  | -2.804 | Down |
| NTNG2        | -0.978 | -2.706 | -2.861 | Down |
| BMP4         | -0.773 | -2.175 | -2.253 |      |
| NLE1         | -0.486 | -1.352 | -1.443 | Down |
| MAP2K6       | -1.286 | -3.469 | -3.678 | Down |
| C14orf73     | -0.678 | -1.803 | -1.908 | Down |
| C10orf140    | -0.519 | -1.386 | -1.478 | Down |
| IFIT1        | -0.89  | -2.339 | -2.612 | Down |
| C2CD4B       | -0.399 | -1.027 | -1.167 | Down |
| NUDT18       | -1.431 | -3.636 | -4.071 | Down |
| C12orf52     | -0.655 | -1.717 | -1.866 | Down |
| ADCK5        | -0.701 | -1.794 | -1.975 | Down |
| PDLIM1       | -0.545 | -1.299 | -1.498 | Down |
| MAGED4B      | -0.883 | -2.184 | -2.525 | Down |
| PRKD1        | -0.428 | -1.038 | -1.093 | Down |
| C21orf125    | -0.542 | -1.313 | -1.395 | Down |
| APC2         | -0.618 | -1.544 | -1.643 | Down |
| ADORA2B      | -0.468 | -1.164 | -1.238 | Down |
| PCYT2        | -1.167 | -2.782 | -3.062 | Down |
| C3orf18      | -1.504 | -3.627 | -3.95  | Down |
| USP9X        | -0.983 | -2.362 | -2.617 | Down |
| TMEM37       | -1.426 | -4.374 | -4.856 | Down |
| GPR162       | -0.794 | -2.375 | -2.733 | Down |
| APIG2        | -0.466 | -1.432 | -1.621 | Down |
| SLC38A6      | -0.319 | -0.958 | -1.092 | Down |
| KCTD18       | -0.489 | -1.389 | -1.566 | Down |
| C11orf35     | -0.671 | -1.932 | -2.204 | Down |
| VASH1        | -1.316 | -3.697 | -4.287 | Down |
| SIDT2        | -0.697 | -2.101 | -2.39  | Down |
| MYOM3        | -0.544 | -1.602 | -1.853 | Down |
| PON3         | -0.311 | -0.879 | -1.058 | Down |
| CCDC34       | -0.307 | -0.888 | -1.057 | Down |
| RIBC2        | -0.719 | -2.083 | -2.506 | Down |
| LOC554202    | -0.507 | -1.715 | -1.988 | Down |
| KCNJ8        | -0.385 | -1.232 | -1.417 | Down |
| KIAA0495     | -0.343 | -1.227 | -1.35  |      |
| FNDC4        | -0.329 | -1.178 | -1.279 |      |
| CD99L2       | -0.392 | -1.319 | -1.44  |      |
| AGTRAP       | -0.27  | -0.956 | -1.049 |      |
| FOXRED1      | -0.395 | -1.327 | -1.487 |      |
| C4orf14      | -0.339 | -1.114 | -1.261 | Down |
| BAAT         | -1.224 | -4.26  | -4.789 |      |
| TBXAS1       | -0.308 | -1.195 | -1.335 |      |
| SYT3         | -0.351 | -1.552 | -1.71  |      |
| CLDN2        | -0.945 | -3.945 | -4.266 |      |
| BCKDHB       | -0.421 | -1.784 | -1.931 |      |
| SELENBP1     | -0.532 | -2.123 | -2.294 |      |
| RARRES3      | -0.249 | -1.057 | -1.136 |      |
| TMEM80       | -0.368 | -1.606 | -1.698 |      |
| FDPS         | -0.28  | -1.1   | -1.182 |      |
| CCDC153      | -0.244 | -0.952 | -1.006 |      |
| UGT1A6       | -0.26  | -0.957 | -1.022 |      |
| MYO3B        | -0.258 | -1.03  | -1.215 |      |
| GCNT3        | -0.255 | -1.029 | -1.206 |      |
| THRA         | -0.448 | -1.697 | -2.014 |      |
| SYT12        | -0.665 | -2.575 | -3.12  | Down |
| PAFAH1B3     | -0.32  | -1.241 | -1.472 |      |
| ODF3L1       | -0.239 | -0.918 | -1.104 | Down |
| MAP4K2       | -0.513 | -1.985 | -2.382 | Down |
| RHPN1        | -0.441 | -1.605 | -1.868 |      |
| LOC283710    | -0.317 | -1.524 | -1.748 |      |
| HSD17B4      | -0.306 | -1.376 | -1.627 |      |
| SGK2         | -0.259 | -1.59  | -1.988 |      |
| FCGBP        | -0.333 | -1.859 | -2.323 |      |
| PEX11B       | -0.161 | -0.934 | -1.201 |      |
| LOC730011    | -0.131 | -0.887 | -1.112 |      |

|              |        |        |        |      |
|--------------|--------|--------|--------|------|
| SPDEF        | -0.562 | -3.034 | -3.696 |      |
| SLC38A10     | -0.166 | -0.887 | -1.073 |      |
| TMBIM4       | -0.16  | -1.005 | -1.314 |      |
| KRT19        | -0.218 | -1.436 | -1.888 |      |
| CDH1         | -0.354 | -2.243 | -2.991 |      |
| MBD4         | -0.175 | -1.052 | -1.396 |      |
| BCAS1        | -0.512 | -2.812 | -3.756 | Down |
| RTDR1        | -0.176 | -1.05  | -1.419 | Down |
| MAOA         | -0.365 | -1.826 | -2.302 |      |
| EME1         | -0.381 | -1.805 | -2.272 |      |
| PRY2         | -0.258 | -1.186 | -1.536 | Down |
| PGD          | -0.288 | -1.41  | -1.841 | Down |
| B3GALT4      | -0.542 | -2.672 | -3.542 | Down |
| BANK1        | -0.259 | -1.147 | -1.544 | Down |
| PCDHA4       | -0.307 | -1.189 | -1.519 | Down |
| LOC731139    | -0.318 | -1.253 | -1.617 | Down |
| GABRA5       | -0.318 | -1.199 | -1.531 | Down |
| AP2M1        | -0.248 | -0.959 | -1.243 | Down |
| TMC5         | -0.415 | -1.678 | -2.17  | Down |
| MEGF9        | -0.253 | -1.038 | -1.37  | Down |
| PTPN6        | -0.43  | -1.925 | -2.38  |      |
| NOVA1        | -0.337 | -1.395 | -1.733 | Down |
| VAV3         | -0.919 | -3.484 | -4.363 | Down |
| SLCO3A1      | -0.634 | -1.162 | -1.387 | Down |
| KCNMB4       | -1.077 | -2.008 | -2.398 | Down |
| DSP          | -0.502 | -0.898 | -1.077 | Down |
| DIS3L        | -0.596 | -1.079 | -1.295 | Down |
| C8orf51      | -0.949 | -1.759 | -2.109 | Down |
| C11orf80     | -0.462 | -0.842 | -1.032 | Down |
| BCL2L11      | -0.558 | -1.016 | -1.255 | Down |
| ARHGAP1      | -0.648 | -1.182 | -1.444 | Down |
| UROS         | -0.89  | -1.62  | -2.027 | Down |
| LOC80154     | -0.669 | -1.26  | -1.573 | Down |
| MAP2         | -0.883 | -1.624 | -1.994 | Down |
| LOC100128567 | -0.499 | -0.886 | -1.104 | Down |
| ZC4H2        | -1.38  | -2.541 | -3.122 | Down |
| TCF19        | -0.717 | -1.369 | -1.659 | Down |
| PET112L      | -0.633 | -1.203 | -1.461 | Down |
| ECHDC2       | -0.869 | -1.713 | -2.078 | Down |
| TTC39C       | -0.566 | -0.996 | -1.251 | Down |
| SIPR5        | -0.673 | -1.195 | -1.489 | Down |
| KIAA1737     | -0.486 | -0.829 | -1.049 | Down |
| IL22RA1      | -1.215 | -2.067 | -2.621 | Down |
| FLJ11235     | -1.024 | -1.789 | -2.215 | Down |
| BRE          | -0.623 | -1.052 | -1.303 | Down |
| EVC          | -0.489 | -0.844 | -1.045 | Down |
| ASRGL1       | -0.686 | -1.2   | -1.489 | Down |
| SOX4         | -0.592 | -0.964 | -1.145 | Down |
| DACT2        | -2.479 | -4.087 | -4.873 | Down |
| PRICKLE2     | -0.815 | -1.386 | -1.583 | Down |
| CLDN3        | -1.117 | -1.854 | -2.148 | Down |
| LRRC3        | -0.499 | -0.854 | -1.004 | Down |
| C6orf153     | -1.056 | -1.821 | -2.104 | Down |
| KRT222       | -0.825 | -1.472 | -1.737 | Down |
| APEX2        | -0.623 | -1.076 | -1.281 | Down |
| SH3GLB2      | -0.475 | -0.863 | -1.013 | Down |
| STOX2        | -1.282 | -2.36  | -2.697 | Down |
| WNT6         | -0.996 | -1.755 | -1.965 | Down |
| KIF26A       | -1.054 | -1.895 | -2.124 | Down |
| MUS81        | -1.041 | -1.8   | -1.98  | Down |
| AMDHD2       | -1.119 | -1.905 | -2.146 | Down |
| VPS33A       | -0.588 | -1.015 | -1.121 | Down |
| HSPA2        | -1.546 | -2.76  | -3.001 | Down |
| CDKN2A       | -0.53  | -0.925 | -1.011 | Down |
| RAB15        | -1.03  | -1.986 | -2.173 | Down |
| NDUFAF3      | -0.5   | -0.942 | -1.051 | Down |
| LRRC23       | -0.536 | -1.008 | -1.124 | Down |
| AHSA1        | -0.652 | -1.237 | -1.379 | Down |
| TRMT2A       | -0.534 | -1.018 | -1.132 | Down |
| RAD51L3      | -0.989 | -1.893 | -2.059 | Down |
| MEX3B        | -0.814 | -1.65  | -1.835 | Down |
| LOC729421    | -0.821 | -1.64  | -1.853 | Down |
| FDPSSL2A     | -0.597 | -1.175 | -1.309 | Down |
| AFAP1L2      | -0.62  | -1.234 | -1.383 | Down |
| SNORA12      | -2.241 | -4.448 | -4.916 | Down |
| MSH6         | -0.568 | -1.095 | -1.258 | Down |
| HMGB3        | -0.547 | -1.062 | -1.225 | Down |
| SALL2        | -2.084 | -4.102 | -4.763 | Down |
| MREG         | -0.75  | -1.717 | -2.036 | Down |
| GCLC         | -0.599 | -1.327 | -1.577 | Down |
| ZNF643       | -0.621 | -1.371 | -1.655 | Down |
| ZNF575       | -1.291 | -2.889 | -3.447 | Down |
| SEPX1        | -0.739 | -1.61  | -1.952 | Down |
| RIMKLA       | -1.188 | -2.704 | -3.306 | Down |
| PCYOX1L      | -0.837 | -1.906 | -2.282 | Down |
| LOC100129958 | -0.416 | -0.969 | -1.178 | Down |
| CALCOCO1     | -0.486 | -1.112 | -1.347 | Down |
| GSR          | -0.393 | -0.88  | -1.113 | Down |

|              |        |        |        |      |
|--------------|--------|--------|--------|------|
| CAST         | -0.452 | -1.044 | -1.309 | Down |
| ZNF32        | -1.075 | -2.379 | -2.98  | Down |
| MXD4         | -0.644 | -1.417 | -1.738 | Down |
| MRPS27       | -0.396 | -0.866 | -1.08  | Down |
| RNF31        | -0.567 | -1.162 | -1.414 | Down |
| FBXO4        | -1.076 | -2.239 | -2.759 | Down |
| C11orf93     | -0.687 | -1.403 | -1.776 | Down |
| ARMC9        | -0.629 | -1.313 | -1.648 | Down |
| LOC100128191 | -0.431 | -0.837 | -1.069 | Down |
| IPO4         | -0.427 | -0.844 | -1.057 | Down |
| ZNF74        | -0.665 | -1.281 | -1.604 | Down |
| TNNT1        | -0.475 | -1.083 | -1.268 | Down |
| SFRS13B      | -0.408 | -0.911 | -1.055 | Down |
| PKD3         | -0.477 | -1.06  | -1.203 | Down |
| MID1         | -0.622 | -1.44  | -1.626 | Down |
| SAPS2        | -0.441 | -0.97  | -1.094 | Down |
| MAPK12       | -0.444 | -0.944 | -1.075 | Down |
| CPLX2        | -0.617 | -1.323 | -1.512 | Down |
| CACNB3       | -0.695 | -1.466 | -1.652 | Down |
| ZDHHC6       | -0.946 | -2.043 | -2.339 | Down |
| LOC375190    | -0.646 | -1.375 | -1.524 | Down |
| CYB5R2       | -0.68  | -1.411 | -1.594 | Down |
| WVVOX        | -0.706 | -1.458 | -1.716 | Down |
| ALAD         | -0.689 | -1.44  | -1.701 | Down |
| ZNF879       | -0.437 | -0.876 | -1.039 | Down |
| SNRNP25      | -0.942 | -1.861 | -1.941 | Down |
| BATF3        | -0.552 | -1.128 | -1.168 | Down |
| E2F2         | -0.655 | -1.322 | -1.435 | Down |
| AQP11        | -1.034 | -2.075 | -2.213 | Down |
| INTS3        | -1.033 | -2.276 | -2.321 | Down |
| GATM         | -0.874 | -1.89  | -1.943 | Down |
| CHRNA2       | -0.844 | -1.823 | -1.846 | Down |
| A2LD1        | -1.131 | -2.492 | -2.553 | Down |
| MAST3        | -0.708 | -1.522 | -1.536 | Down |
| RPUSD4       | -0.448 | -1.018 | -1.099 | Down |
| C10orf11     | -0.541 | -1.197 | -1.295 | Down |
| STARD7       | -0.777 | -1.681 | -1.804 | Down |
| B9D1         | -0.897 | -1.882 | -2.036 | Down |
| PRAME        | -0.667 | -1.073 | -1.025 | Down |
| MCM4         | -0.922 | -1.493 | -1.423 | Down |
| LOC286161    | -0.852 | -1.368 | -1.325 | Down |
| CLYBL        | -0.82  | -1.293 | -1.244 | Down |
| ZG16B        | -1.034 | -1.648 | -1.599 | Down |
| SAPS1        | -0.636 | -1.067 | -1.007 | Down |
| LOC100128838 | -0.902 | -1.54  | -1.442 | Down |
| PEX10        | -0.568 | -1.005 | -0.912 | Down |
| CA11         | -1.023 | -1.773 | -1.6   | Down |
| MCM6         | -0.657 | -1.154 | -1.105 | Down |
| HSP90AB5P    | -0.971 | -1.711 | -1.605 | Down |
| TMSL1        | -0.678 | -1.212 | -1.173 | Down |
| LOC729409    | -0.622 | -1.065 | -1.047 | Down |
| ATAD4        | -1.413 | -2.35  | -2.288 | Down |
| SCNN1A       | -1.331 | -2.136 | -2.135 | Down |
| NCRNA00094   | -1.584 | -2.541 | -2.541 | Down |
| FBXO15       | -1.752 | -2.753 | -2.803 | Down |
| GPR20        | -0.989 | -1.507 | -1.519 | Down |
| ATP6AP1L     | -0.741 | -1.108 | -1.137 | Down |
| SLC2A6       | -0.817 | -1.249 | -1.264 | Down |
| FOXMI        | -0.641 | -0.967 | -1.013 | Down |
| DISP1        | -0.855 | -1.3   | -1.359 | Down |
| GSTO2        | -0.66  | -0.997 | -1.048 | Down |
| LOC643783    | -0.623 | -1.136 | -1.22  | Down |
| CCDC159      | -0.844 | -1.535 | -1.626 | Down |
| MMAB         | -0.977 | -1.814 | -1.912 | Down |
| BCMO1        | -0.561 | -1.047 | -1.081 | Down |
| ZNF177       | -0.528 | -0.956 | -1.013 | Down |
| SNX22        | -0.912 | -1.687 | -1.753 | Down |
| ARHGEF9      | -1.209 | -2.068 | -2.206 | Down |
| ADCY7        | -0.57  | -0.99  | -1.043 | Down |
| SLC9A3R1     | -1.037 | -1.827 | -1.913 | Down |
| MYL5         | -0.844 | -1.489 | -1.565 | Down |
| MGC23284     | -1.061 | -1.903 | -1.989 | Down |
| WBSR27       | -0.564 | -1.015 | -1.028 | Down |
| RNF213       | -1.163 | -2.098 | -2.113 | Down |
| PGAP3        | -0.733 | -1.356 | -1.34  | Down |
| C18orf10     | -0.644 | -1.212 | -1.211 | Down |
| CCDC103      | -0.902 | -1.479 | -1.637 | Down |
| BAMBI        | -0.878 | -1.417 | -1.576 | Down |
| TIMM13       | -0.797 | -1.29  | -1.465 | Down |
| SCARNA12     | -1.01  | -1.591 | -1.719 | Down |
| PLCG1        | -0.863 | -1.351 | -1.462 | Down |
| SHISA4       | -0.632 | -1.009 | -1.091 | Down |
| KLHDC4       | -0.636 | -1.062 | -1.145 | Down |
| C15orf38     | -0.686 | -1.12  | -1.202 | Down |
| IKBKAP       | -0.554 | -0.927 | -1.007 | Down |
| ZNF287       | -0.735 | -1.208 | -1.267 | Down |
| PARP10       | -0.592 | -0.985 | -1.026 | Down |
| TCF25        | -0.589 | -0.983 | -1.004 | Down |



|              |        |        |        |      |
|--------------|--------|--------|--------|------|
| ARRB1        | -1.564 | -2.663 | -2.684 | Down |
| C9orf103     | -0.988 | -1.094 | -1.591 | Down |
| PRKDC        | -0.677 | -0.745 | -1.096 | Down |
| C7orf25      | -1.669 | -1.869 | -2.771 | Down |
| MSTO1        | -1.657 | -1.828 | -2.576 | Down |
| C16orf35     | -1.173 | -1.318 | -1.867 | Down |
| PSMC5        | -0.902 | -0.944 | -1.419 | Down |
| ODF3L2       | -1.253 | -1.328 | -1.934 | Down |
| SCARNA17     | -1.296 | -1.348 | -2.182 | Down |
| PRR20B       | -1.07  | -1.121 | -1.798 | Down |
| GSC          | -1.334 | -1.403 | -2.253 | Down |
| FXN          | -0.9   | -0.951 | -1.535 | Down |
| THNSL1       | -2.055 | -2.199 | -3.479 | Down |
| RASIP1       | -1.177 | -1.239 | -1.936 | Down |
| C9orf38      | -0.698 | -0.748 | -1.138 | Down |
| KRTAP1-3     | -0.635 | -0.737 | -1.225 | Down |
| IMPDH1       | -0.516 | -0.597 | -1.004 | Down |
| SPATA4       | -0.543 | -0.613 | -1.025 | Down |
| FBXL16       | -0.656 | -0.782 | -1.271 | Down |
| C1orf93      | -1.158 | -1.338 | -2.225 | Down |
| SPOCD1       | -0.589 | -0.699 | -1.153 | Down |
| HECW1        | -0.612 | -0.74  | -1.182 | Down |
| CEBPA        | -0.883 | -1.07  | -1.729 | Down |
| PARS2        | -0.571 | -0.707 | -1.115 | Down |
| MYBBP1A      | -0.865 | -1.045 | -1.685 | Down |
| LOC647086    | -0.698 | -0.843 | -1.379 | Down |
| ZNF252       | -0.757 | -0.961 | -1.579 | Down |
| SPRYD4       | -0.591 | -0.757 | -1.256 | Down |
| LOC222070    | -0.996 | -1.231 | -2.045 | Down |
| ANKRD16      | -1.314 | -1.616 | -2.669 | Down |
| POLR3H       | -0.95  | -1.116 | -1.774 | Down |
| LOC145474    | -0.766 | -0.924 | -1.436 | Down |
| KILLIN       | -1.074 | -1.287 | -2.022 | Down |
| FAM114A2     | -0.658 | -0.776 | -1.228 | Down |
| ZNF425       | -0.99  | -1.218 | -1.859 | Down |
| LOC257152    | -0.566 | -0.652 | -1.017 | Down |
| C21orf58     | -0.663 | -0.748 | -1.171 | Down |
| LOC401022    | -0.716 | -0.81  | -1.268 | Down |
| SHARPIN      | -0.766 | -0.878 | -1.376 | Down |
| CPT2         | -0.717 | -0.842 | -1.297 | Down |
| SCARNA16     | -1.095 | -1.247 | -2.037 | Down |
| LOC100147773 | -1.286 | -1.451 | -2.343 | Down |
| MRPL46       | -0.825 | -0.901 | -1.524 | Down |
| KCNH3        | -0.552 | -0.602 | -1.012 | Down |
| RWDD2B       | -1.203 | -1.299 | -2.189 | Down |
| RNASEL       | -1.457 | -1.532 | -2.56  | Down |
| EXOSC3       | -0.702 | -0.747 | -1.233 | Down |
| IFT52        | -0.69  | -0.836 | -1.15  | Down |
| ALG1         | -0.66  | -0.803 | -1.117 | Down |
| PYCRL        | -0.854 | -1.069 | -1.442 | Down |
| DQX1         | -0.842 | -0.996 | -1.446 | Down |
| C9orf125     | -1.198 | -1.392 | -2.039 | Down |
| THOC3        | -0.682 | -0.805 | -1.173 | Down |
| PARD6G       | -1.254 | -1.474 | -2.162 | Down |
| LOC644613    | -1.05  | -1.251 | -1.82  | Down |
| POLE2        | -0.625 | -0.752 | -1.138 | Down |
| ADRA1D       | -1.46  | -1.756 | -2.629 | Down |
| TMEM121      | -1.059 | -1.279 | -1.932 | Down |
| RPA1         | -0.586 | -0.71  | -1.05  | Down |
| FBXO16       | -2.264 | -2.89  | -4.191 | Down |
| ATP13A2      | -1.339 | -1.688 | -2.448 | Down |
| TRIP13       | -0.739 | -0.961 | -1.394 | Down |
| FANCG        | -1.111 | -1.473 | -2.134 | Down |
| CACYBP       | -0.869 | -1.12  | -1.644 | Down |
| ZNF114       | -0.978 | -1.267 | -1.75  | Down |
| VPS33B       | -0.592 | -0.747 | -1.049 | Down |
| PSMD4        | -0.554 | -0.711 | -1.01  | Down |
| FLJ40504     | -0.679 | -0.862 | -1.206 | Down |
| LOC729213    | -0.586 | -0.793 | -1.083 | Down |
| C21orf70     | -0.636 | -0.844 | -1.143 | Down |
| BRCC3        | -0.604 | -0.791 | -1.086 | Down |
| BAT4         | -0.964 | -1.291 | -1.771 | Down |
| ZNF792       | -0.857 | -1.123 | -1.567 | Down |
| GPRIN2       | -2.57  | -3.419 | -4.798 | Down |
| URM1         | -0.548 | -0.753 | -1.093 | Down |
| PAAF1        | -0.895 | -1.238 | -1.805 | Down |
| SETMAR       | -0.595 | -0.814 | -1.187 | Down |
| LOC730236    | -1.423 | -1.908 | -2.756 | Down |
| WDR31        | -1.016 | -1.394 | -2.028 | Down |
| FIBP         | -0.665 | -0.887 | -1.327 | Down |
| FAM78B       | -0.526 | -0.698 | -1.041 | Down |
| TEX19        | -1.175 | -1.657 | -2.356 | Down |
| LOC284014    | -0.505 | -0.731 | -1.044 | Down |
| LOC152286    | -0.554 | -0.784 | -1.147 | Down |
| FHOD3        | -1.676 | -2.449 | -3.548 | Down |
| PRR5         | -0.667 | -0.89  | -1.364 | Down |
| LOC401480    | -0.529 | -0.721 | -1.099 | Down |
| SLC35E3      | -0.764 | -1.019 | -1.611 | Down |

|              |        |        |        |      |
|--------------|--------|--------|--------|------|
| MYPOP        | -1.101 | -1.391 | -2.185 | Down |
| FAM21C       | -0.532 | -0.687 | -1.058 | Down |
| ZNF703       | -0.71  | -0.992 | -1.192 | Down |
| PGM2         | -0.641 | -0.908 | -1.081 | Down |
| FAM192A      | -0.723 | -1.02  | -1.253 | Down |
| AVIL         | -0.707 | -1.014 | -1.217 | Down |
| ZNF397       | -0.601 | -0.858 | -1.053 | Down |
| RTN4RL1      | -0.797 | -1.114 | -1.368 | Down |
| MYOM2        | -1.048 | -1.541 | -1.781 | Down |
| GTF2A1       | -0.643 | -0.922 | -1.067 | Down |
| ANXA2P3      | -0.752 | -1.09  | -1.277 | Down |
| SEPT5        | -0.667 | -0.942 | -1.104 | Down |
| PGAP2        | -0.84  | -1.276 | -1.484 | Down |
| LRR1Q3       | -0.75  | -1.152 | -1.357 | Down |
| ELAC1        | -2.094 | -3.228 | -3.823 | Down |
| ANXA2P1      | -0.739 | -1.138 | -1.361 | Down |
| KBTBD7       | -0.818 | -1.198 | -1.473 | Down |
| ARHGEF10L    | -0.938 | -1.411 | -1.729 | Down |
| WDR51A       | -0.666 | -1.02  | -1.155 | Down |
| TMEM86B      | -0.893 | -1.344 | -1.533 | Down |
| HSPA8        | -2.473 | -3.682 | -4.274 | Down |
| EXOC4        | -0.907 | -1.37  | -1.597 | Down |
| TET1         | -0.869 | -1.325 | -1.488 | Down |
| RGS9BP       | -0.588 | -0.909 | -1.019 | Down |
| SRD5A1       | -1.148 | -1.469 | -1.894 | Down |
| LOC645332    | -0.993 | -1.241 | -1.564 | Down |
| MMACHC       | -1.122 | -1.414 | -1.788 | Down |
| LOC642808    | -0.697 | -0.901 | -1.13  | Down |
| ORC3L        | -0.724 | -1.004 | -1.24  | Down |
| MYB          | -0.963 | -1.316 | -1.635 | Down |
| MGAT3        | -1.837 | -2.549 | -3.095 | Down |
| C9orf98      | -1.199 | -1.642 | -1.985 | Down |
| KRBA1        | -1.005 | -1.372 | -1.701 | Down |
| GPS2         | -1.147 | -1.534 | -1.914 | Down |
| IRF2BP2      | -0.787 | -1.047 | -1.309 | Down |
| CDC123       | -0.672 | -0.883 | -1.087 | Down |
| HOXC6        | -1.079 | -1.419 | -1.741 | Down |
| ANO7         | -0.663 | -0.885 | -1.062 | Down |
| NSDHL        | -0.965 | -1.292 | -1.594 | Down |
| LOH12CR2     | -0.758 | -1.006 | -1.221 | Down |
| C17orf100    | -0.989 | -1.29  | -1.711 | Down |
| B4GALNT1     | -2.398 | -3.137 | -4.132 | Down |
| PRODH        | -0.834 | -1.127 | -1.491 | Down |
| APBA2        | -1.414 | -1.94  | -2.565 | Down |
| FAM59A       | -1.035 | -1.397 | -1.798 | Down |
| DDX28        | -0.927 | -1.28  | -1.631 | Down |
| SEC14L4      | -0.79  | -1.116 | -1.431 | Down |
| SURF1        | -0.694 | -0.947 | -1.216 | Down |
| SLC3A1       | -1.087 | -1.519 | -1.914 | Down |
| LOC159110    | -0.545 | -0.885 | -1.145 | Down |
| LOC100127925 | -0.52  | -0.856 | -1.103 | Down |
| CCDC125      | -0.713 | -1.157 | -1.498 | Down |
| APEX1        | -0.758 | -1.196 | -1.559 | Down |
| OLFM1        | -0.516 | -0.821 | -1.066 | Down |
| MRPL20       | -0.615 | -0.985 | -1.283 | Down |
| LOC442249    | -0.504 | -0.82  | -1.04  | Down |
| GMPS         | -0.563 | -0.909 | -1.133 | Down |
| RNFT2        | -0.741 | -1.171 | -1.462 | Down |
| CDCA7L       | -0.821 | -1.358 | -1.66  | Down |
| B4GALT7      | -0.749 | -1.214 | -1.491 | Down |
| MTHFD1       | -0.665 | -1.098 | -1.361 | Down |
| C16orf62     | -0.769 | -1.18  | -1.482 | Down |
| ACD          | -0.759 | -1.153 | -1.44  | Down |
| PNPO         | -1.101 | -1.713 | -2.095 | Down |
| PAOX         | -0.61  | -0.935 | -1.167 | Down |
| PALM         | -0.773 | -1.155 | -1.468 | Down |
| MOCS1        | -0.791 | -1.207 | -1.519 | Down |
| GNG2         | -0.869 | -1.302 | -1.633 | Down |
| ZNF324B      | -0.901 | -1.357 | -1.767 | Down |
| TH1L         | -0.531 | -0.776 | -1.004 | Down |
| PLA2G2E      | -0.529 | -0.795 | -1.022 | Down |
| MAPKAPK3     | -0.849 | -1.213 | -1.636 | Down |
| ANKAR        | -0.802 | -1.147 | -1.534 | Down |
| TP53I3       | -0.806 | -1.144 | -1.53  | Down |
| PRMT7        | -1.486 | -2.087 | -2.791 | Down |
| GYS1         | -0.862 | -1.199 | -1.665 | Down |
| MCRS1        | -0.519 | -0.763 | -1.033 | Down |
| G6PD         | -0.509 | -0.766 | -1.023 | Down |
| SNORD116-19  | -1.466 | -2.166 | -2.999 | Down |
| YPEL4        | -0.943 | -0.618 | -1.209 |      |
| COMMD7       | -0.949 | -0.629 | -1.138 |      |
| RNF222       | -1.079 | -0.763 | -1.232 |      |
| C1orf175     | -1.383 | -1.034 | -1.628 | Down |
| ADPRH        | -1.326 | -0.989 | -1.627 | Down |
| KPRP         | -1.136 | -0.969 | -1.288 | Down |
| MYBL2        | -0.998 | -0.897 | -1.193 | Down |
| KCTD14       | -1.313 | -1.139 | -1.565 | Down |
| RCOR2        | -1.475 | -1.252 | -1.796 | Down |

|  |  |  |  |              |        |        |        |      |
|--|--|--|--|--------------|--------|--------|--------|------|
|  |  |  |  | LOC100129540 | -0.827 | -0.708 | -1.013 | Down |
|  |  |  |  | WDR77        | -1.117 | -0.97  | -1.42  | Down |
|  |  |  |  | SNORA74A     | -0.97  | -0.865 | -1.215 | Down |
|  |  |  |  | SNORA62      | -1.611 | -1.455 | -2.055 | Down |
|  |  |  |  | LRRN3        | -1.185 | -1.054 | -1.509 | Down |
|  |  |  |  | TSC2         | -0.799 | -0.632 | -1.011 | Down |
|  |  |  |  | LOC400558    | -1.485 | -1.222 | -1.872 | Down |
|  |  |  |  | LOC100130520 | -1.067 | -0.883 | -1.344 | Down |
|  |  |  |  | HSPA5        | -1.183 | -0.938 | -1.387 | Down |
|  |  |  |  | FSCN1        | -0.707 | -0.646 | -1.138 | Down |
|  |  |  |  | EFNA4        | -0.938 | -0.847 | -1.483 | Down |
|  |  |  |  | SCARNA2      | -1.04  | -0.976 | -1.651 | Down |
|  |  |  |  | LOC400958    | -0.664 | -0.584 | -1.013 | Down |
|  |  |  |  | LOC100129235 | -1.383 | -1.261 | -2.12  | Down |
|  |  |  |  | RNF32        | -0.702 | -0.614 | -1.016 | Down |
|  |  |  |  | GATA5        | -1.377 | -1.232 | -2.019 | Down |
|  |  |  |  | CEP68        | -0.919 | -0.851 | -1.369 | Down |
|  |  |  |  | PPP1R3G      | -0.739 | -0.706 | -1.141 | Down |
|  |  |  |  | NADSYN1      | -0.906 | -0.883 | -1.4   | Down |
|  |  |  |  | LOC286063    | -0.789 | -0.678 | -1.075 | Down |
|  |  |  |  | CYGB         | -1.006 | -0.864 | -1.369 | Down |
|  |  |  |  | C11orf60     | -0.933 | -0.81  | -1.304 | Down |
|  |  |  |  | LOC100129534 | -0.801 | -0.742 | -1.134 | Down |
|  |  |  |  | DIRAS1       | -0.93  | -0.872 | -1.311 | Down |
|  |  |  |  | USP14        | -1.061 | -0.883 | -1.512 | Down |
|  |  |  |  | EGLN3        | -1.299 | -1.095 | -1.876 | Down |
|  |  |  |  | SYNGR4       | -0.728 | -0.593 | -1.012 | Down |
|  |  |  |  | PRKAR1B      | -1.111 | -0.812 | -1.516 | Down |
|  |  |  |  | LOC80054     | -0.748 | -0.51  | -1.031 | Down |
|  |  |  |  | SURF2        | -0.73  | -0.536 | -1.076 | Down |
|  |  |  |  | OR8B4        | -1.313 | -1.231 | -1.346 |      |
|  |  |  |  | COASY        | -1.126 | -1.096 | -1.207 |      |
|  |  |  |  | ACTR10       | -1.054 | -0.992 | -1.11  |      |
|  |  |  |  | LCE4A        | -1.526 | -1.516 | -1.61  |      |
|  |  |  |  | LOC100132330 | -1.461 | -1.321 | -1.409 |      |
|  |  |  |  | BOK          | -1.464 | -1.314 | -1.425 |      |
|  |  |  |  | DLGAP1       | -1.217 | -1.077 | -1.22  |      |
|  |  |  |  | SP110        | -1.327 | -1.286 | -1.32  |      |
|  |  |  |  | LOC100287919 | -1.232 | -1.169 | -1.175 |      |
|  |  |  |  | CLEC4M       | -1.165 | -1.113 | -1.123 |      |
|  |  |  |  | OR2M7        | -1.058 | -1.094 | -1.17  |      |
|  |  |  |  | LOC644189    | -2.25  | -2.321 | -2.46  |      |
|  |  |  |  | CYS1         | -1.267 | -1.326 | -1.42  |      |
|  |  |  |  | CRYBG3       | -0.923 | -0.956 | -1.049 |      |
|  |  |  |  | RANBP17      | -1.175 | -1.234 | -1.351 |      |
|  |  |  |  | LOC100127920 | -1.569 | -1.585 | -1.818 |      |
|  |  |  |  | PFAS         | -1.16  | -1.215 | -1.362 |      |
|  |  |  |  | LOC648987    | -0.997 | -1.044 | -1.19  |      |
|  |  |  |  | PCDHGB4      | -0.957 | -1.043 | -1.079 |      |
|  |  |  |  | C9orf24      | -1.061 | -1.188 | -1.169 |      |
|  |  |  |  | CDK5R2       | -0.983 | -0.941 | -1.116 |      |
|  |  |  |  | CCT5         | -1.246 | -1.201 | -1.408 |      |
|  |  |  |  | LOC100130116 | -1.47  | -1.453 | -1.752 |      |
|  |  |  |  | LOC100132077 | -1.029 | -0.924 | -1.141 |      |
|  |  |  |  | FAM120AOS    | -1.398 | -1.28  | -1.533 |      |
|  |  |  |  | ZFHX4        | -1.366 | -1.111 | -1.391 |      |
|  |  |  |  | RRP7A        | -1.184 | -0.978 | -1.231 |      |
|  |  |  |  | OR10A6       | -1.181 | -0.892 | -1.197 |      |
|  |  |  |  | LRRN2        | -1.057 | -0.805 | -1.033 |      |
|  |  |  |  | HTR7         | -1.827 | -1.475 | -1.751 |      |
|  |  |  |  | GLUL         | -1.009 | -0.841 | -0.955 |      |
|  |  |  |  | MMP17        | -0.74  | -0.771 | -1.084 | Down |
|  |  |  |  | FAM134B      | -1.976 | -2.006 | -2.872 | Down |
|  |  |  |  | WDR4         | -1.462 | -1.521 | -2.138 | Down |
|  |  |  |  | PRINS        | -0.926 | -0.966 | -1.329 | Down |
|  |  |  |  | PNMA5        | -1.043 | -1.036 | -1.495 | Down |
|  |  |  |  | IL17RD       | -1.6   | -1.587 | -2.337 | Down |
|  |  |  |  | LOC728129    | -0.841 | -0.831 | -1.182 | Down |
|  |  |  |  | CDH15        | -0.855 | -0.827 | -1.184 | Down |
|  |  |  |  | SFTPA2       | -0.733 | -0.743 | -1.012 | Down |
|  |  |  |  | C13orf38     | -0.777 | -0.772 | -1.066 | Down |
|  |  |  |  | ADSL         | -1.241 | -1.223 | -1.688 | Down |
|  |  |  |  | PNPLA4       | -0.848 | -0.773 | -1.143 | Down |
|  |  |  |  | MX1          | -0.763 | -0.725 | -1.016 | Down |
|  |  |  |  | LOC648149    | -1.394 | -1.309 | -1.868 | Down |
|  |  |  |  | FBXL8        | -0.657 | -0.84  | -1.027 | Down |
|  |  |  |  | C19orf54     | -1.4   | -1.774 | -2.135 | Down |
|  |  |  |  | MPP2         | -1.356 | -1.736 | -2.038 | Down |
|  |  |  |  | LOC401431    | -1.377 | -1.675 | -2.108 | Down |
|  |  |  |  | DNAJC30      | -1.215 | -1.467 | -1.797 | Down |
|  |  |  |  | DBNL         | -1.658 | -1.904 | -2.437 | Down |
|  |  |  |  | BTBD6        | -1.514 | -1.773 | -2.213 | Down |
|  |  |  |  | LOC728940    | -1.698 | -1.95  | -2.451 | Down |
|  |  |  |  | LOC100128108 | -0.938 | -1.084 | -1.353 | Down |
|  |  |  |  | SBK1         | -2.264 | -2.544 | -3.169 | Down |
|  |  |  |  | LOC730091    | -0.777 | -0.883 | -1.091 | Down |
|  |  |  |  | JMJD4        | -1.823 | -2.032 | -2.722 | Down |
|  |  |  |  | ACOT4        | -2.177 | -2.354 | -3.217 | Down |

|              |        |        |        |      |
|--------------|--------|--------|--------|------|
| FAM176B      | -0.753 | -0.828 | -1.1   | Down |
| CD79A        | -0.861 | -0.963 | -1.274 | Down |
| ARMCX1       | -0.72  | -0.806 | -1.061 | Down |
| ZNF19        | -1.699 | -1.872 | -2.428 | Down |
| FASN         | -0.965 | -1.09  | -1.407 | Down |
| LOC440905    | -0.773 | -0.947 | -1.247 | Down |
| FTSJ3        | -0.664 | -0.802 | -1.054 | Down |
| ACLY         | -0.812 | -0.993 | -1.288 | Down |
| SNORA23      | -0.942 | -1.1   | -1.468 | Down |
| LOC440149    | -0.865 | -1.011 | -1.357 | Down |
| LOC100132839 | -0.991 | -1.172 | -1.337 | Down |
| KHK          | -1.978 | -2.299 | -2.637 | Down |
| ZSCAN16      | -0.878 | -1.022 | -1.198 | Down |
| RAB11FIP4    | -1.378 | -1.615 | -1.92  | Down |
| C2orf81      | -1.601 | -1.853 | -2.192 | Down |
| HOMEZ        | -1.869 | -2.114 | -2.489 | Down |
| DNAJC14      | -0.78  | -0.949 | -1.078 | Down |
| CCDC87       | -0.85  | -1.051 | -1.203 | Down |
| LOC649264    | -0.815 | -1.011 | -1.171 | Down |
| TTC12        | -1.743 | -2.093 | -2.408 | Down |
| LOC100131391 | -1.127 | -1.363 | -1.57  | Down |
| NUDT9P1      | -1.083 | -1.325 | -1.576 | Down |
| ARHGAP22     | -1.644 | -1.618 | -2.133 | Down |
| DBN1         | -1.534 | -1.595 | -1.985 | Down |
| CCDC102A     | -0.908 | -0.949 | -1.181 | Down |
| SPTBN2       | -0.987 | -1.013 | -1.254 | Down |
| NOL12        | -1.34  | -1.361 | -1.71  | Down |
| LOC339929    | -1.718 | -1.766 | -2.208 | Down |
| LOC100132832 | -0.891 | -0.951 | -1.172 | Down |
| DENND2D      | -2.275 | -2.456 | -2.96  | Down |
| LOC729680    | -2.431 | -2.539 | -3.345 | Down |
| ZC3H4        | -1.148 | -1.249 | -1.58  | Down |
| SRCRB4D      | -0.95  | -1.024 | -1.3   | Down |
| PSMG1        | -0.816 | -0.885 | -1.102 | Down |
| KLHL35       | -0.789 | -0.836 | -1.065 | Down |
| COL10A1      | -1.327 | -1.39  | -1.782 | Down |
| C21orf122    | -1.174 | -1.222 | -1.572 | Down |
| STOX1        | -0.912 | -0.95  | -1.198 | Down |
| NOC4L        | -0.832 | -1.17  | -1.201 |      |
| ARL4D        | -0.991 | -1.387 | -1.408 |      |
| SFXN2        | -1.047 | -1.488 | -1.503 |      |
| LOC388152    | -0.726 | -1.005 | -1.05  |      |
| GPRIN1       | -1.073 | -1.475 | -1.541 |      |
| RIMS3        | -0.716 | -1.019 | -1.072 | Down |
| SCNM1        | -0.939 | -1.377 | -1.379 |      |
| AXIN2        | -1.661 | -2.46  | -2.401 |      |
| FAM66C       | -0.858 | -1.137 | -1.233 | Down |
| CFB          | -1.729 | -2.246 | -2.445 | Down |
| TLR1         | -1.316 | -1.736 | -1.832 |      |
| RHBDL3       | -1.213 | -1.615 | -1.734 | Down |
| PFN4         | -1.392 | -1.819 | -1.913 |      |
| HECTD3       | -1.09  | -1.392 | -1.494 |      |
| PLCG2        | -1.042 | -1.378 | -1.418 |      |
| LOC285178    | -2.006 | -2.617 | -2.714 |      |
| LOC283674    | -0.913 | -1.209 | -1.26  |      |
| BHLHB9       | -0.76  | -1.007 | -1.028 |      |
| TBC1D9B      | -0.842 | -1.207 | -1.347 | Down |
| STARD5       | -0.931 | -1.302 | -1.473 | Down |
| LHX2         | -1.394 | -1.924 | -2.235 | Down |
| FBXW8        | -0.983 | -1.399 | -1.511 | Down |
| C5orf55      | -1.141 | -1.603 | -1.76  | Down |
| DNMT3B       | -1.027 | -1.374 | -1.576 | Down |
| BDH2         | -0.88  | -1.171 | -1.324 | Down |
| THOP1        | -0.753 | -0.964 | -1.096 | Down |
| PKN3         | -1.113 | -1.293 | -1.343 |      |
| LOC400236    | -1.788 | -2.036 | -2.129 |      |
| C21orf67     | -1.005 | -1.196 | -1.247 |      |
| LOC100131552 | -0.928 | -1.052 | -1.136 |      |
| GPRASP2      | -1.719 | -1.966 | -2.085 |      |
| GPR120       | -0.945 | -1.08  | -1.161 |      |
| EAF2         | -1.222 | -1.404 | -1.48  |      |
| PCDHGA2      | -1.697 | -1.92  | -2.08  |      |
| GJD3         | -0.956 | -1.076 | -1.211 |      |
| ZNF70        | -1.393 | -1.616 | -1.776 |      |
| KIAA1908     | -2.315 | -2.684 | -2.957 |      |
| ZNRF1        | -1.844 | -2.152 | -2.331 |      |
| HSPA1A       | -2.339 | -2.788 | -2.993 |      |
| GJB2         | -0.893 | -1.024 | -1.129 |      |
| AIFM3        | -0.816 | -0.951 | -1.046 |      |
| LOC100144603 | -1.288 | -1.569 | -1.692 |      |
| CCIN         | -0.807 | -0.992 | -1.056 |      |
| LOC285593    | -0.857 | -1.048 | -1.14  |      |
| MVK          | -1.229 | -1.524 | -1.606 |      |
| LOC100128916 | -0.844 | -1.035 | -1.078 |      |
| ZFP41        | -1.566 | -2.067 | -2.031 |      |
| ZBED2        | -0.947 | -1.248 | -1.241 |      |
| VPS52        | -1.211 | -1.66  | -1.609 |      |
| PRPF6        | -0.912 | -1.156 | -1.159 |      |

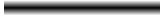

|              |        |        |        |
|--------------|--------|--------|--------|
| DNAH11       | -1.074 | -1.386 | -1.382 |
| CISH         | -1.608 | -2.067 | -2.072 |
| C20orf56     | -1.642 | -2.055 | -2.08  |
| TCP1         | -1.113 | -1.32  | -1.332 |
| CHAF1B       | -1.169 | -1.4   | -1.38  |
| RBM15B       | -0.959 | -1.165 | -1.171 |
| DMAPI        | -0.825 | -1.036 | -1.022 |
| CSRP2        | -1     | -1.231 | -1.239 |
| LRRC46       | -1.159 | -1.451 | -1.119 |
| FAM63A       | -0.923 | -1.128 | -0.86  |
| FAM66A       | -0.986 | -1.259 | -0.908 |
| LOC441722    | -0.747 | -1.03  | -0.771 |
| RMND1        | -0.836 | -1.116 | -0.871 |
| GDAP1        | -1.486 | -1.936 | -1.496 |
| CLIC3        | -1.247 | -1.746 | -1.373 |
| NLRP2        | -0.952 | -1.259 | -0.83  |
| SLC30A3      | -1.132 | -1.444 | -0.971 |
| ERP44        | -0.834 | -1.067 | -0.709 |
| PDCL2        | -0.724 | -1.009 | -0.672 |
| THEM4        | -1.05  | -1.331 | -1.11  |
| LOC650392    | -0.977 | -1.204 | -1.029 |
| STK36        | -0.923 | -1.217 | -1.013 |
| HSPA1B       | -1.878 | -2.526 | -2.11  |
| SLC4A3       | -1.437 | -1.889 | -1.544 |
| LOC100129936 | -1.103 | -1.422 | -1.217 |
| C21orf2      | -0.829 | -1.089 | -0.934 |
| LOC286121    | -0.992 | -1.278 | -1.134 |
| OR2A20P      | -1.053 | -1.296 | -1.185 |
| LOC144571    | -1.582 | -1.905 | -1.775 |
| PRNT         | -1.174 | -1.474 | -1.32  |
| GINS3        | -1.06  | -1.318 | -1.169 |
| TAAR9        | -1.045 | -1.223 | -1.147 |
| TMEM177      | -1.185 | -1.563 | -1.427 |
| GINS2        | -1.097 | -1.399 | -1.304 |
| PRKCQ        | -1.623 | -2.253 | -1.989 |
| STYXL1       | -0.861 | -1.17  | -1.014 |
| TELO2        | -0.898 | -1.257 | -1.075 |
| MOSC1        | -1.175 | -1.626 | -1.371 |
| VWASB2       | -1.376 | -1.889 | -1.572 |
| GMPPB        | -0.916 | -1.362 | -1.137 |
| ALG12        | -0.873 | -1.308 | -1.091 |
| TMEM145      | -0.92  | -1.348 | -1.124 |
| HSP90AB1     | -0.936 | -1.693 | -1.329 |
| B3GNT4       | -0.585 | -1.09  | -0.85  |
| LGALS2       | -1.04  | -1.85  | -1.473 |
| SDF2L1       | -0.627 | -1.129 | -0.93  |
| KAZALD1      | -0.989 | -1.835 | -1.514 |
| HSP90AB2P    | -0.932 | -1.768 | -1.326 |
| GNG4         | -0.664 | -1.309 | -0.985 |
| SDR16C6      | -0.62  | -1.082 | -0.831 |
| OPLAH        | -1.035 | -1.857 | -1.391 |
| G6PC         | -0.581 | -1.011 | -0.76  |
| ANXA9        | -1.137 | -2.027 | -1.515 |
| PCDHB2       | -1.052 | -1.606 | -1.515 |
| LOC222699    | -0.731 | -1.146 | -1.065 |
| CAMK2N2      | -1.044 | -1.624 | -1.499 |
| CCDC3        | -0.804 | -1.316 | -1.171 |
| C15orf51     | -0.678 | -1.097 | -0.982 |
| TMEM63C      | -1.277 | -2.039 | -1.809 |
| SMARCC2      | -0.651 | -1.021 | -0.892 |
| OSGEP        | -0.859 | -1.32  | -1.165 |
| CHMP6        | -0.987 | -1.453 | -1.316 |
| TTC39A       | -0.689 | -1.073 | -0.901 |
| KHDC1        | -1.136 | -1.819 | -1.549 |
| RFC5         | -0.742 | -1.233 | -1.009 |
| NDRG2        | -1.492 | -2.406 | -1.99  |
| REEP2        | -0.592 | -1.014 | -0.853 |
| GALNT6       | -1.072 | -1.811 | -1.519 |
| LOC153811    | -0.73  | -1.221 | -1.057 |
| GANC         | -1.048 | -1.948 | -1.737 |
| GALNT10      | -0.771 | -1.427 | -1.275 |
| LOC100132857 | -0.904 | -1.653 | -1.412 |
| ACAD9        | -0.864 | -1.576 | -1.375 |
| DNA2         | -0.606 | -1.186 | -1.004 |
| SCAMP5       | -1.934 | -2.908 | -2.082 |
| E2F1         | -0.765 | -1.164 | -0.864 |
| LOC283332    | -0.666 | -1.03  | -0.705 |
| IKBKE        | -0.924 | -1.473 | -1.099 |
| GPR124       | -1.172 | -1.923 | -1.374 |
| hCG_2014417  | -0.774 | -1.147 | -0.891 |
| ARPM1        | -0.805 | -1.227 | -0.958 |
| SFRS2B       | -0.768 | -1.241 | -0.959 |
| LAYN         | -1.12  | -1.793 | -1.382 |
| PDX1         | -0.722 | -1.162 | -0.918 |
| TSPAN33      | -0.585 | -1.001 | -0.568 |
| ZNF189       | -0.773 | -1.336 | -0.784 |
| RRM2         | -0.621 | -1.054 | -0.622 |
| LOC100009676 | -0.742 | -1.201 | -0.695 |

|  |  |  |  |  |              |        |        |        |      |
|--|--|--|--|--|--------------|--------|--------|--------|------|
|  |  |  |  |  | PRRT3        | -1.522 | -2.795 | -1.606 |      |
|  |  |  |  |  | C1orf182     | -1.087 | -1.955 | -1.143 |      |
|  |  |  |  |  | SHF          | -0.699 | -1.248 | -0.674 |      |
|  |  |  |  |  | PRODH2       | -0.84  | -1.326 | -0.848 |      |
|  |  |  |  |  | PCDHA3       | -0.995 | -1.632 | -1.026 |      |
|  |  |  |  |  | POLA2        | -0.928 | -1.399 | -0.901 |      |
|  |  |  |  |  | LOXL1        | -0.78  | -1.185 | -0.755 |      |
|  |  |  |  |  | SF3A3        | -0.682 | -1.038 | -0.645 |      |
|  |  |  |  |  | TMEM45A      | -1.966 | -3.433 | -2.229 |      |
|  |  |  |  |  | NKAIN1       | -0.976 | -1.692 | -1.108 |      |
|  |  |  |  |  | PRDM4        | -0.57  | -1.033 | -0.681 |      |
|  |  |  |  |  | HNRNPD       | -0.676 | -1.25  | -0.848 |      |
|  |  |  |  |  | TMEM98       | -0.979 | -1.749 | -1.222 |      |
|  |  |  |  |  | LOC348751    | -0.863 | -1.497 | -1.057 |      |
|  |  |  |  |  | EXO1         | -0.801 | -1.556 | -0.955 |      |
|  |  |  |  |  | C12orf53     | -0.775 | -1.409 | -0.872 |      |
|  |  |  |  |  | TMEM92       | -0.533 | -1.196 | -0.664 |      |
|  |  |  |  |  | METTL7B      | -1.017 | -2.396 | -1.244 |      |
|  |  |  |  |  | MAGIX        | -0.856 | -1.886 | -1.009 |      |
|  |  |  |  |  | C19orf48     | -0.456 | -1.01  | -0.527 |      |
|  |  |  |  |  | TM7SF2       | -0.399 | -1.026 | -0.583 |      |
|  |  |  |  |  | ANGPTL2      | -0.438 | -1.177 | -0.651 |      |
|  |  |  |  |  | UCP2         | -1.867 | -4.046 | -2.604 |      |
|  |  |  |  |  | CBLN3        | -0.679 | -1.468 | -0.968 |      |
|  |  |  |  |  | CCNE2        | -0.552 | -1.163 | -0.744 |      |
|  |  |  |  |  | SLC44A2      | -0.797 | -1.651 | -1.013 |      |
|  |  |  |  |  | EFNB3        | -1.22  | -2.54  | -1.574 |      |
|  |  |  |  |  | FLJ39609     | -0.521 | -1.034 | -0.709 |      |
|  |  |  |  |  | CACNA1H      | -0.674 | -1.384 | -0.976 |      |
|  |  |  |  |  | FAM19A5      | -0.58  | -1.34  | -0.871 |      |
|  |  |  |  |  | CES2         | -0.487 | -1.174 | -0.756 |      |
|  |  |  |  |  | PLEKHF1      | -0.401 | -0.514 | -1.225 | Down |
|  |  |  |  |  | FAM127C      | -0.918 | -1.154 | -2.751 | Down |
|  |  |  |  |  | UNQ2963      | -0.402 | -0.475 | -1.164 | Down |
|  |  |  |  |  | CLDN10       | -0.563 | -0.674 | -1.617 | Down |
|  |  |  |  |  | LOC158863    | -0.897 | -1.052 | -2.706 | Down |
|  |  |  |  |  | INVS         | -0.426 | -0.506 | -1.268 | Down |
|  |  |  |  |  | ZBED3        | -0.575 | -0.693 | -1.722 | Down |
|  |  |  |  |  | RPL23AP32    | -0.779 | -0.893 | -2.324 | Down |
|  |  |  |  |  | METTL12      | -0.849 | -0.977 | -2.476 | Down |
|  |  |  |  |  | USP40        | -0.862 | -0.962 | -2.414 | Down |
|  |  |  |  |  | LRBA         | -0.391 | -0.423 | -1.089 | Down |
|  |  |  |  |  | LOC100288455 | -0.549 | -0.588 | -1.417 | Down |
|  |  |  |  |  | IMP3         | -0.519 | -0.584 | -1.402 | Down |
|  |  |  |  |  | C22orf40     | -0.629 | -0.74  | -1.712 | Down |
|  |  |  |  |  | STAG3L1      | -0.345 | -0.352 | -1.045 | Down |
|  |  |  |  |  | HOXA6        | -0.907 | -0.932 | -2.786 | Down |
|  |  |  |  |  | FLJ11710     | -0.759 | -0.786 | -2.249 | Down |
|  |  |  |  |  | C16orf53     | -0.563 | -0.562 | -1.612 | Down |
|  |  |  |  |  | ZNF205       | -0.406 | -0.459 | -1.269 | Down |
|  |  |  |  |  | ZFP62        | -0.553 | -0.64  | -1.739 | Down |
|  |  |  |  |  | LOC100132234 | -0.412 | -0.459 | -1.301 | Down |
|  |  |  |  |  | ACP6         | -0.443 | -0.504 | -1.382 | Down |
|  |  |  |  |  | SNORA59B     | -0.478 | -0.543 | -1.464 | Down |
|  |  |  |  |  | OSCAR        | -0.372 | -0.43  | -1.14  | Down |
|  |  |  |  |  | IFIT5        | -0.38  | -0.42  | -1.133 | Down |
|  |  |  |  |  | ANKS6        | -0.868 | -0.939 | -2.558 | Down |
|  |  |  |  |  | LOC284630    | -0.503 | -0.595 | -1.718 | Down |
|  |  |  |  |  | PSKH1        | -0.455 | -0.529 | -1.518 | Down |
|  |  |  |  |  | hCG_1645220  | -0.436 | -0.494 | -1.423 | Down |
|  |  |  |  |  | TMEM144      | -0.469 | -0.578 | -1.594 | Down |
|  |  |  |  |  | AGTPBP1      | -0.461 | -0.575 | -1.586 | Down |
|  |  |  |  |  | LOC728558    | -0.45  | -0.563 | -1.606 | Down |
|  |  |  |  |  | LOC283911    | -0.319 | -0.41  | -1.031 | Down |
|  |  |  |  |  | LOC151878    | -0.51  | -0.64  | -1.605 | Down |
|  |  |  |  |  | LOC642781    | -0.493 | -0.624 | -1.599 | Down |
|  |  |  |  |  | CCL7         | -0.376 | -0.46  | -1.219 | Down |
|  |  |  |  |  | FANCF        | -1.307 | -1.884 | -4.566 | Down |
|  |  |  |  |  | DERA         | -0.453 | -0.632 | -1.569 | Down |
|  |  |  |  |  | MEIS3        | -0.547 | -0.744 | -1.833 | Down |
|  |  |  |  |  | NEK9         | -0.32  | -0.425 | -1.097 | Down |
|  |  |  |  |  | LOC100133923 | -0.57  | -0.779 | -1.972 | Down |
|  |  |  |  |  | LOC100130711 | -0.517 | -0.707 | -1.863 | Down |
|  |  |  |  |  | LOC339803    | -0.401 | -0.632 | -1.787 | Down |
|  |  |  |  |  | IFIT2        | -0.271 | -0.405 | -1.15  | Down |
|  |  |  |  |  | TPCN2        | -0.334 | -0.484 | -1.388 | Down |
|  |  |  |  |  | LOC100289600 | -0.407 | -0.602 | -1.66  | Down |
|  |  |  |  |  | C17orf39     | -0.287 | -0.442 | -1.203 | Down |
|  |  |  |  |  | NUP37        | -0.272 | -0.428 | -1.169 | Down |
|  |  |  |  |  | F8A2         | -0.539 | -0.71  | -2.041 | Down |
|  |  |  |  |  | BRUNOL6      | -0.271 | -0.341 | -1.006 | Down |
|  |  |  |  |  | ZBTB37       | -0.336 | -0.444 | -1.259 | Down |
|  |  |  |  |  | SH3PXD2B     | -0.723 | -0.96  | -2.727 | Down |
|  |  |  |  |  | PIP4K2B      | -0.301 | -0.411 | -1.166 | Down |
|  |  |  |  |  | KLHL12       | -0.266 | -0.358 | -1.007 | Down |
|  |  |  |  |  | CCDC51       | -0.491 | -0.695 | -1.932 | Down |
|  |  |  |  |  | LOC728739    | -0.436 | -0.615 | -1.941 | Down |
|  |  |  |  |  | FLJ10213     | -0.274 | -0.374 | -1.186 | Down |

|  |  |  |  |              |        |        |        |      |
|--|--|--|--|--------------|--------|--------|--------|------|
|  |  |  |  | MAP2K5       | -0.48  | -0.658 | -2.066 | Down |
|  |  |  |  | LOC283070    | -0.275 | -0.379 | -1.151 | Down |
|  |  |  |  | LOC100128563 | -0.596 | -0.811 | -2.42  | Down |
|  |  |  |  | PITPNC1      | -0.364 | -0.426 | -1.393 | Down |
|  |  |  |  | PDCD2        | -0.604 | -0.684 | -2.231 | Down |
|  |  |  |  | C6orf122     | -0.379 | -0.453 | -1.396 | Down |
|  |  |  |  | ASB13        | -0.32  | -0.378 | -1.138 | Down |
|  |  |  |  | HAUS6        | -0.412 | -0.502 | -1.553 | Down |
|  |  |  |  | SLC30A6      | -0.49  | -0.495 | -1.572 | Down |
|  |  |  |  | RERE         | -0.459 | -0.465 | -1.529 | Down |
|  |  |  |  | LOC440525    | -0.307 | -0.346 | -1.044 | Down |
|  |  |  |  | GNAZ         | -0.859 | -0.919 | -2.812 | Down |
|  |  |  |  | ZDHH4        | -0.399 | -0.673 | -1.615 | Down |
|  |  |  |  | SYNC         | -0.298 | -0.505 | -1.24  | Down |
|  |  |  |  | PDCD5        | -0.263 | -0.45  | -1.078 | Down |
|  |  |  |  | PRSS36       | -0.534 | -0.881 | -2.211 | Down |
|  |  |  |  | LOC100128430 | -0.391 | -0.604 | -1.456 | Down |
|  |  |  |  | HES6         | -0.382 | -0.615 | -1.487 | Down |
|  |  |  |  | NDUFB9       | -0.349 | -0.548 | -1.305 | Down |
|  |  |  |  | DTD1         | -0.357 | -0.578 | -1.348 | Down |
|  |  |  |  | XK           | -0.433 | -0.694 | -1.634 | Down |
|  |  |  |  | RNF144A      | -0.366 | -0.566 | -1.369 | Down |
|  |  |  |  | REEP4        | -0.386 | -0.571 | -1.479 | Down |
|  |  |  |  | BRMS1        | -0.51  | -0.771 | -1.968 | Down |
|  |  |  |  | NDRG3        | -0.598 | -0.911 | -2.433 | Down |
|  |  |  |  | FLJ25917     | -0.469 | -0.73  | -1.896 | Down |
|  |  |  |  | C1orf58      | -0.357 | -0.267 | -1.076 | Down |
|  |  |  |  | ATP6V1E2     | -0.797 | -0.608 | -2.513 | Down |
|  |  |  |  | MLYCD        | -0.49  | -0.4   | -1.519 | Down |
|  |  |  |  | RGL1         | -0.82  | -0.759 | -2.669 | Down |
|  |  |  |  | EID3         | -0.413 | -0.4   | -1.416 | Down |
|  |  |  |  | SYNJ2BP      | -0.337 | -0.319 | -1.06  | Down |
|  |  |  |  | LOC400987    | -0.629 | -0.595 | -1.92  | Down |
|  |  |  |  | PNMA2        | -0.628 | -0.573 | -1.932 | Down |
|  |  |  |  | WDSUB1       | -0.405 | -0.348 | -1.223 | Down |
|  |  |  |  | OIP5         | -0.39  | -0.336 | -1.154 | Down |
|  |  |  |  | NECAB2       | -0.608 | -0.401 | -1.644 | Down |
|  |  |  |  | FAM65A       | -0.454 | -0.306 | -1.252 | Down |
|  |  |  |  | VPS13D       | -0.6   | -0.365 | -1.589 | Down |
|  |  |  |  | MINA         | -0.408 | -0.256 | -1.137 | Down |
|  |  |  |  | SCARNA1      | -0.379 | -0.312 | -1.048 | Down |
|  |  |  |  | CCBL2        | -0.603 | -0.439 | -1.561 | Down |
|  |  |  |  | PLEKHA2      | -0.564 | -0.455 | -1.4   | Down |
|  |  |  |  | MOP-1        | -0.606 | -0.484 | -1.485 | Down |
|  |  |  |  | TCF3         | -0.464 | -0.352 | -1.139 | Down |
|  |  |  |  | STAG3L2      | -0.504 | -0.396 | -1.263 | Down |
|  |  |  |  | C9orf100     | -0.38  | -0.327 | -1.02  | Down |
|  |  |  |  | AGAP11       | -0.579 | -0.495 | -1.511 | Down |
|  |  |  |  | TCFL5        | -0.625 | -0.565 | -1.61  | Down |
|  |  |  |  | LOC142937    | -0.686 | -0.63  | -1.806 | Down |
|  |  |  |  | GAB2         | -0.824 | -0.784 | -2.251 | Down |
|  |  |  |  | DCP1B        | -0.745 | -0.724 | -2.044 | Down |
|  |  |  |  | TMEM69       | -0.392 | -0.376 | -1.075 | Down |
|  |  |  |  | STEAP1       | -0.631 | -0.382 | -1.375 | Down |
|  |  |  |  | LOC100125556 | -0.516 | -0.33  | -1.149 | Down |
|  |  |  |  | TRIM14       | -0.545 | -0.617 | -1.179 | Down |
|  |  |  |  | PACS2        | -1.104 | -1.227 | -2.338 | Down |
|  |  |  |  | C7orf49      | -0.549 | -0.619 | -1.195 | Down |
|  |  |  |  | LOC644450    | -1.033 | -1.212 | -2.368 | Down |
|  |  |  |  | GTF3C2       | -0.559 | -0.632 | -1.254 | Down |
|  |  |  |  | SCARNA13     | -1.366 | -1.67  | -3.001 | Down |
|  |  |  |  | ADCY3        | -0.606 | -0.744 | -1.374 | Down |
|  |  |  |  | XRRA1        | -0.449 | -0.54  | -1.083 | Down |
|  |  |  |  | RGS19        | -0.937 | -1.141 | -2.284 | Down |
|  |  |  |  | C1orf74      | -0.6   | -0.727 | -1.437 | Down |
|  |  |  |  | BHLHE23      | -0.644 | -0.75  | -1.512 | Down |
|  |  |  |  | SCARNA9      | -1.321 | -1.562 | -3.107 | Down |
|  |  |  |  | LOC653113    | -1.016 | -1.267 | -2.553 | Down |
|  |  |  |  | ASB4         | -0.518 | -0.66  | -1.293 | Down |
|  |  |  |  | SLC16A13     | -0.776 | -0.966 | -1.838 | Down |
|  |  |  |  | NLRX1        | -0.574 | -0.727 | -1.39  | Down |
|  |  |  |  | LOC100128719 | -0.522 | -0.662 | -1.238 | Down |
|  |  |  |  | FAM164C      | -0.59  | -0.781 | -1.475 | Down |
|  |  |  |  | ST6GAL1      | -1.829 | -2.206 | -4.888 | Down |
|  |  |  |  | METTL13      | -0.785 | -0.922 | -2.053 | Down |
|  |  |  |  | C15orf40     | -0.39  | -0.45  | -1.012 | Down |
|  |  |  |  | FAM43B       | -0.603 | -0.727 | -1.529 | Down |
|  |  |  |  | EIF3F        | -0.634 | -0.766 | -1.614 | Down |
|  |  |  |  | LOC100291206 | -0.599 | -0.658 | -1.438 | Down |
|  |  |  |  | LOC100129781 | -1.019 | -1.085 | -2.49  | Down |
|  |  |  |  | F2RL2        | -0.663 | -0.846 | -1.457 | Down |
|  |  |  |  | C5orf54      | -1.268 | -1.581 | -2.765 | Down |
|  |  |  |  | TERC         | -0.754 | -0.992 | -1.694 | Down |
|  |  |  |  | LOC401037    | -0.719 | -0.932 | -1.613 | Down |
|  |  |  |  | DOLK         | -0.468 | -0.613 | -1.04  | Down |
|  |  |  |  | C8orf30A     | -0.762 | -1.011 | -1.685 | Down |
|  |  |  |  | MRP63        | -0.499 | -0.683 | -1.127 | Down |
|  |  |  |  | TSMF         | -0.474 | -0.667 | -1.074 | Down |

|  |  |  |  |  |              |        |        |        |      |
|--|--|--|--|--|--------------|--------|--------|--------|------|
|  |  |  |  |  | MANSC1       | -1.408 | -2.057 | -3.277 | Down |
|  |  |  |  |  | OR6C2        | -0.736 | -1.032 | -1.662 | Down |
|  |  |  |  |  | LRP3         | -0.864 | -1.222 | -1.927 | Down |
|  |  |  |  |  | EIF2B1       | -0.555 | -0.769 | -1.221 | Down |
|  |  |  |  |  | DECR1        | -0.599 | -0.835 | -1.319 | Down |
|  |  |  |  |  | KLHL31       | -0.554 | -0.773 | -1.218 | Down |
|  |  |  |  |  | C14orf169    | -0.905 | -1.258 | -1.941 | Down |
|  |  |  |  |  | SETD6        | -0.482 | -0.732 | -1.181 | Down |
|  |  |  |  |  | RGS14        | -0.954 | -1.49  | -2.352 | Down |
|  |  |  |  |  | PRIM1        | -1.182 | -1.874 | -2.998 | Down |
|  |  |  |  |  | LOC100132733 | -0.796 | -1.256 | -1.979 | Down |
|  |  |  |  |  | MSRB2        | -0.659 | -1.087 | -1.716 | Down |
|  |  |  |  |  | HS6ST1       | -0.981 | -1.594 | -2.558 | Down |
|  |  |  |  |  | PFKM         | -0.525 | -0.861 | -1.39  | Down |
|  |  |  |  |  | RNASEN       | -0.659 | -0.974 | -1.613 | Down |
|  |  |  |  |  | LOC100133315 | -0.642 | -0.977 | -1.588 | Down |
|  |  |  |  |  | ZNF497       | -0.716 | -1.106 | -1.816 | Down |
|  |  |  |  |  | OTX1         | -0.558 | -0.796 | -1.313 | Down |
|  |  |  |  |  | LOC143286    | -0.651 | -0.943 | -1.545 | Down |
|  |  |  |  |  | TRADD        | -0.948 | -1.553 | -2.573 | Down |
|  |  |  |  |  | KIAA0196     | -0.621 | -0.983 | -1.63  | Down |
|  |  |  |  |  | LOC158572    | -0.434 | -0.685 | -1.171 | Down |
|  |  |  |  |  | C14orf159    | -0.704 | -1.103 | -1.884 | Down |
|  |  |  |  |  | C14orf72     | -0.752 | -1.162 | -1.979 | Down |
|  |  |  |  |  | BCAS3        | -0.599 | -0.95  | -1.578 | Down |
|  |  |  |  |  | SMARCAL1     | -1.251 | -1.821 | -3.247 | Down |
|  |  |  |  |  | RABL2A       | -0.415 | -0.601 | -1.053 | Down |
|  |  |  |  |  | LOC645249    | -1.62  | -2.325 | -4.135 | Down |
|  |  |  |  |  | IMPACT       | -0.938 | -1.357 | -2.384 | Down |
|  |  |  |  |  | RIMBP3       | -2.002 | -2.749 | -4.89  | Down |
|  |  |  |  |  | DGKA         | -0.552 | -0.754 | -1.365 | Down |
|  |  |  |  |  | WDR34        | -0.535 | -0.752 | -1.347 | Down |
|  |  |  |  |  | SORBS3       | -0.535 | -0.751 | -1.308 | Down |
|  |  |  |  |  | DAB2         | -0.785 | -1.063 | -1.854 | Down |
|  |  |  |  |  | C4orf42      | -1.365 | -1.898 | -3.297 | Down |
|  |  |  |  |  | C1orf59      | -1.189 | -1.621 | -2.89  | Down |
|  |  |  |  |  | KIAA1549     | -0.786 | -1.085 | -1.855 | Down |
|  |  |  |  |  | CHTF18       | -0.502 | -0.716 | -1.203 | Down |
|  |  |  |  |  | TRIM34       | -0.752 | -1.025 | -1.769 | Down |
|  |  |  |  |  | PTPRS        | -0.433 | -0.618 | -1.048 | Down |
|  |  |  |  |  | CDX2         | -0.619 | -0.873 | -1.514 | Down |
|  |  |  |  |  | HSPA1L       | -0.7   | -0.935 | -1.663 | Down |
|  |  |  |  |  | C1orf220     | -0.994 | -1.289 | -2.303 | Down |
|  |  |  |  |  | NPEPL1       | -0.51  | -0.801 | -1.83  | Down |
|  |  |  |  |  | LOC728449    | -0.478 | -0.722 | -1.65  | Down |
|  |  |  |  |  | RBM45        | -1.045 | -1.53  | -3.5   | Down |
|  |  |  |  |  | PTCD2        | -0.427 | -0.623 | -1.414 | Down |
|  |  |  |  |  | GTF2IRD1     | -0.434 | -0.657 | -1.457 | Down |
|  |  |  |  |  | CCDC88C      | -0.35  | -0.507 | -1.153 | Down |
|  |  |  |  |  | VPS29        | -0.356 | -0.557 | -1.179 | Down |
|  |  |  |  |  | GUSBL2       | -0.453 | -0.712 | -1.528 | Down |
|  |  |  |  |  | PRTFDC1      | -0.461 | -0.752 | -1.64  | Down |
|  |  |  |  |  | MMAA         | -0.711 | -0.962 | -2.199 | Down |
|  |  |  |  |  | LRRC20       | -0.934 | -1.241 | -2.885 | Down |
|  |  |  |  |  | LOC158435    | -0.368 | -0.492 | -1.161 | Down |
|  |  |  |  |  | AIMP2        | -0.59  | -0.787 | -1.831 | Down |
|  |  |  |  |  | USP41        | -0.477 | -0.639 | -1.487 | Down |
|  |  |  |  |  | C14orf101    | -0.51  | -0.671 | -1.431 | Down |
|  |  |  |  |  | BRCA1        | -0.512 | -0.673 | -1.428 | Down |
|  |  |  |  |  | B3GALT6      | -1.057 | -1.444 | -3.09  | Down |
|  |  |  |  |  | PMS2L11      | -0.375 | -0.488 | -1.09  | Down |
|  |  |  |  |  | F8A1         | -0.746 | -0.977 | -2.146 | Down |
|  |  |  |  |  | ATP5S        | -0.451 | -0.575 | -1.277 | Down |
|  |  |  |  |  | TMEM8C       | -0.331 | -0.485 | -1.024 | Down |
|  |  |  |  |  | MRS2         | -0.633 | -0.91  | -1.998 | Down |
|  |  |  |  |  | SLC35E2      | -0.436 | -0.635 | -1.352 | Down |
|  |  |  |  |  | PRELID2      | -0.75  | -1.063 | -2.286 | Down |
|  |  |  |  |  | LOC730413    | -0.487 | -0.665 | -1.334 | Down |
|  |  |  |  |  | LOC729088    | -0.651 | -0.908 | -1.84  | Down |
|  |  |  |  |  | LOC203274    | -0.529 | -0.743 | -1.458 | Down |
|  |  |  |  |  | LGALS3BP     | -0.386 | -0.546 | -1.072 | Down |
|  |  |  |  |  | SYNM         | -0.619 | -0.837 | -1.703 | Down |
|  |  |  |  |  | TMEM169      | -0.552 | -0.743 | -1.474 | Down |
|  |  |  |  |  | C3orf25      | -0.417 | -0.555 | -1.094 | Down |
|  |  |  |  |  | FAM50B       | -0.723 | -1.027 | -1.905 | Down |
|  |  |  |  |  | DGCR5        | -0.566 | -0.815 | -1.52  | Down |
|  |  |  |  |  | ZNF232       | -0.949 | -1.329 | -2.519 | Down |
|  |  |  |  |  | RUNX3        | -0.458 | -0.63  | -1.186 | Down |
|  |  |  |  |  | MTMR4        | -1.343 | -1.881 | -3.645 | Down |
|  |  |  |  |  | MRPL38       | -0.555 | -0.782 | -1.493 | Down |
|  |  |  |  |  | MOCS2        | -0.625 | -0.949 | -1.862 | Down |
|  |  |  |  |  | LRFN3        | -0.857 | -1.293 | -2.524 | Down |
|  |  |  |  |  | LOC401387    | -0.38  | -0.557 | -1.091 | Down |
|  |  |  |  |  | LOC100129502 | -0.344 | -0.507 | -1.009 | Down |
|  |  |  |  |  | UBAC1        | -0.821 | -1.219 | -2.367 | Down |
|  |  |  |  |  | STAT6        | -0.956 | -1.425 | -2.735 | Down |
|  |  |  |  |  | FAM127B      | -0.436 | -0.651 | -1.297 | Down |
|  |  |  |  |  | C14orf126    | -0.508 | -0.749 | -1.47  | Down |







|  |              |        |        |        |      |
|--|--------------|--------|--------|--------|------|
|  | HYAL3        | -0.482 | -0.906 | -1.264 | Down |
|  | UBE2L6       | -0.427 | -0.805 | -1.121 | Down |
|  | TUSC4        | -0.65  | -1.271 | -1.763 | Down |
|  | TPD52L1      | -0.487 | -0.933 | -1.302 | Down |
|  | TBCD         | -0.801 | -1.549 | -2.155 | Down |
|  | SGSM2        | -0.468 | -0.89  | -1.235 | Down |
|  | RBKS         | -0.514 | -0.824 | -1.167 | Down |
|  | PTPRU        | -0.557 | -0.917 | -1.282 | Down |
|  | PGP          | -0.526 | -0.847 | -1.212 | Down |
|  | PCDHB9       | -0.518 | -0.856 | -1.21  | Down |
|  | SLC9A3R2     | -1.005 | -1.639 | -2.349 | Down |
|  | RFXANK       | -0.669 | -1.081 | -1.561 | Down |
|  | LOC100287593 | -0.535 | -0.823 | -1.187 | Down |
|  | IL4I1        | -0.447 | -0.71  | -1.015 | Down |
|  | TIGD5        | -0.886 | -1.358 | -1.999 | Down |
|  | TGFB1I1      | -0.725 | -1.126 | -1.643 | Down |
|  | MYO10        | -0.895 | -1.361 | -1.987 | Down |
|  | SIPA1L1      | -0.504 | -0.876 | -1.211 | Down |
|  | SENP8        | -0.748 | -1.29  | -1.796 | Down |
|  | ZBTB42       | -1.526 | -2.695 | -3.685 | Down |
|  | MLPH         | -0.893 | -1.51  | -2.117 | Down |
|  | KRBA2        | -0.442 | -0.741 | -1.028 | Down |
|  | DZIP1        | -0.822 | -1.367 | -1.914 | Down |
|  | COLEC11      | -0.563 | -0.961 | -1.331 | Down |
|  | ZCCHC17      | -0.691 | -1.157 | -1.561 | Down |
|  | TMEM8B       | -0.703 | -1.166 | -1.569 | Down |
|  | CBX5         | -0.527 | -0.889 | -1.198 | Down |
|  | C14orf133    | -0.925 | -1.544 | -2.108 | Down |
|  | RNF34        | -0.565 | -0.966 | -1.258 | Down |
|  | CYB561D2     | -0.527 | -0.895 | -1.168 | Down |
|  | SHMT1        | -0.799 | -1.252 | -1.78  | Down |
|  | PCDHGA3      | -0.568 | -0.879 | -1.242 | Down |
|  | LOC100129362 | -0.471 | -0.741 | -1.033 | Down |
|  | CCNB3        | -0.51  | -0.818 | -1.127 | Down |
|  | CPSF3        | -0.67  | -1.077 | -1.462 | Down |
|  | C1orf203     | -0.485 | -0.759 | -1.035 | Down |
|  | FIG4         | -0.615 | -0.947 | -1.305 | Down |
|  | LOC375295    | -1.065 | -1.651 | -2.219 | Down |
|  | DTNBP1       | -0.927 | -1.386 | -2.12  | Down |
|  | DARS2        | -0.806 | -1.231 | -1.85  | Down |
|  | CENPBD1      | -0.908 | -1.436 | -2.143 | Down |
|  | AMDHDI       | -0.96  | -1.474 | -2.217 | Down |
|  | POLDIP2      | -0.72  | -1.112 | -1.703 | Down |
|  | LOC645261    | -0.444 | -0.677 | -1.059 | Down |
|  | TIGD2        | -0.697 | -1.109 | -1.681 | Down |
|  | SLFN5        | -0.444 | -0.716 | -1.084 | Down |
|  | LOC100288106 | -0.418 | -0.669 | -1.009 | Down |
|  | EMILIN2      | -0.793 | -1.252 | -1.897 | Down |
|  | CT62         | -0.673 | -1.096 | -1.663 | Down |
|  | ATIC         | -0.539 | -0.874 | -1.306 | Down |
|  | ZNF688       | -0.765 | -1.343 | -2.012 | Down |
|  | TMCC1        | -0.683 | -1.19  | -1.763 | Down |
|  | PDK2         | -0.808 | -1.359 | -2.045 | Down |
|  | TNFAIP8L1    | -0.449 | -0.762 | -1.126 | Down |
|  | HERC6        | -0.461 | -0.812 | -1.177 | Down |
|  | ASPSR1       | -0.514 | -0.904 | -1.298 | Down |
|  | PTDSS1       | -0.902 | -1.591 | -2.297 | Down |
|  | RPGRIP1L     | -0.504 | -0.912 | -1.329 | Down |
|  | ILDR1        | -0.38  | -0.704 | -1.012 | Down |
|  | CISD3        | -0.753 | -0.645 | -1.675 | Down |
|  | MEFV         | -0.649 | -0.526 | -1.374 | Down |
|  | LOC400128    | -0.585 | -0.493 | -1.26  | Down |
|  | PIGV         | -0.619 | -0.465 | -1.308 | Down |
|  | EN2          | -0.708 | -0.579 | -1.402 | Down |
|  | APOL2        | -0.511 | -0.417 | -1.024 | Down |
|  | TINAGL1      | -0.831 | -0.653 | -1.646 | Down |
|  | LOC645431    | -1.124 | -0.951 | -2.251 | Down |
|  | COQ4         | -0.592 | -0.511 | -1.19  | Down |
|  | NRG2         | -1.212 | -0.973 | -2.31  | Down |
|  | NMI          | -0.675 | -0.51  | -1.257 | Down |
|  | ASS1         | -0.767 | -0.523 | -1.458 | Down |
|  | LOC642826    | -0.53  | -0.37  | -1.046 | Down |
|  | HAGHL        | -0.567 | -0.406 | -1.119 | Down |
|  | SNAR-C4      | -0.589 | -0.373 | -1.126 | Down |
|  | LRFN1        | -1.281 | -1.182 | -3.18  | Down |
|  | RUNDC2A      | -0.509 | -0.481 | -1.235 | Down |
|  | RPUSD2       | -0.6   | -0.585 | -1.518 | Down |
|  | LOC284373    | -0.419 | -0.399 | -1.026 | Down |
|  | TBL1X        | -0.497 | -0.49  | -1.303 | Down |
|  | LOC100272216 | -0.445 | -0.435 | -1.157 | Down |
|  | EMILIN1      | -0.666 | -0.665 | -1.581 | Down |
|  | CCS          | -0.43  | -0.438 | -1.051 | Down |
|  | AUTS2        | -0.78  | -0.762 | -1.893 | Down |
|  | PFKL         | -0.796 | -0.741 | -1.832 | Down |
|  | FAM86A       | -0.606 | -0.553 | -1.387 | Down |
|  | PHOSPHO2     | -0.687 | -0.579 | -1.637 | Down |
|  | HAPLN2       | -0.666 | -0.647 | -1.459 | Down |
|  | FLJ22184     | -0.752 | -0.694 | -1.595 | Down |

|  |              |        |        |        |      |
|--|--------------|--------|--------|--------|------|
|  | LOC283174    | -0.578 | -0.52  | -1.242 | Down |
|  | FERMT1       | -0.987 | -0.962 | -2.22  | Down |
|  | ELFN1        | -0.591 | -0.597 | -1.358 | Down |
|  | CEBPD        | -0.643 | -0.643 | -1.483 | Down |
|  | LOC389458    | -0.803 | -0.492 | -1.34  | Down |
|  | CCDC78       | -0.613 | -0.38  | -1.046 | Down |
|  | RHBDL1       | -0.678 | -0.425 | -1.215 | Down |
|  | LRRC45       | -1.137 | -0.592 | -1.729 |      |
|  | LOC645781    | -0.644 | -0.346 | -1.008 |      |
|  | LOC100134002 | -0.793 | -0.491 | -1.2   | Down |
|  | APOL1        | -0.979 | -0.645 | -1.473 | Down |
|  | ADAP2        | -0.855 | -0.58  | -1.251 | Down |
|  | LOC100130152 | -0.693 | -0.489 | -1.106 | Down |
|  | WDR18        | -0.742 | -0.546 | -1.163 | Down |
|  | MOCS3        | -0.98  | -0.729 | -1.563 | Down |
|  | UCP3         | -1.054 | -0.828 | -1.859 | Down |
|  | NAGK         | -0.726 | -0.584 | -1.306 | Down |
|  | LOC100134663 | -0.643 | -0.541 | -1.177 | Down |
|  | HOXA7        | -0.972 | -0.739 | -1.66  | Down |
|  | AMN          | -0.771 | -0.584 | -1.309 | Down |
|  | SCLY         | -0.793 | -0.613 | -1.338 | Down |
|  | TLL8         | -0.829 | -0.591 | -1.418 | Down |
|  | SNORA71A     | -0.763 | -0.544 | -1.341 | Down |
|  | KCTD19       | -1.192 | -0.812 | -2.066 | Down |
|  | LOC100134253 | -0.672 | -0.572 | -1.033 | Down |
|  | FAM131C      | -0.659 | -0.55  | -1.041 | Down |
|  | LOC100129447 | -0.862 | -0.743 | -1.411 | Down |
|  | CCDC122      | -1.179 | -1.018 | -1.907 | Down |
|  | SCGB3A1      | -0.642 | -0.567 | -1.086 | Down |
|  | EVX1         | -0.994 | -0.815 | -1.617 | Down |
|  | LOC646999    | -0.63  | -0.581 | -1.086 | Down |
|  | LOC645553    | -0.752 | -0.697 | -1.312 | Down |
|  | HSD17B7      | -0.778 | -0.727 | -1.39  | Down |
|  | LOC113230    | -0.81  | -0.79  | -1.456 | Down |
|  | LOC100134237 | -0.551 | -0.537 | -1.008 | Down |
|  | CARS2        | -0.636 | -0.609 | -1.172 | Down |
|  | C8orf47      | -0.812 | -0.773 | -1.492 | Down |
|  | C18orf23     | -0.605 | -0.588 | -1.134 | Down |
|  | WDR81        | -0.917 | -0.888 | -1.745 | Down |
|  | DPEP3        | -0.726 | -0.641 | -1.31  | Down |
|  | C6orf163     | -1.017 | -0.885 | -1.764 | Down |
|  | TDRD7        | -0.59  | -0.583 | -1.021 | Down |
|  | DET1         | -1.456 | -1.437 | -2.547 | Down |
|  | CASP6        | -1.223 | -1.179 | -2.084 | Down |
|  | LCMT2        | -1.443 | -1.46  | -2.578 | Down |
|  | SNCB         | -0.662 | -0.647 | -1.093 | Down |
|  | NHLRC1       | -0.664 | -0.631 | -1.094 | Down |
|  | TTC5         | -0.514 | -0.479 | -1.024 | Down |
|  | NCK2         | -0.748 | -0.712 | -1.55  | Down |
|  | LOC100129702 | -0.844 | -0.756 | -1.658 | Down |
|  | FHL1         | -0.893 | -0.764 | -1.709 | Down |
|  | PFKFB1       | -0.726 | -0.693 | -1.396 | Down |
|  | BTC          | -0.693 | -0.658 | -1.322 | Down |
|  | DPY19L2P2    | -0.584 | -0.562 | -1.149 | Down |
|  | CDRT8        | -0.647 | -0.584 | -1.231 | Down |
|  | PNMA6A       | -0.896 | -0.916 | -1.845 | Down |
|  | CDC42EP5     | -0.49  | -0.504 | -1.034 | Down |
|  | C15orf39     | -0.856 | -0.885 | -1.774 | Down |
|  | BNIP3        | -0.573 | -0.602 | -1.201 | Down |
|  | NCRNA00176   | -0.653 | -0.701 | -1.389 | Down |
|  | LOC100133994 | -0.817 | -0.851 | -1.781 | Down |
|  | FAM124A      | -0.871 | -0.887 | -1.893 | Down |
|  | GINS4        | -1.073 | -1.122 | -2.134 | Down |
|  | FYCO1        | -0.795 | -0.834 | -1.555 | Down |
|  | PCSK1N       | -0.758 | -0.789 | -1.492 | Down |
|  | PSMB9        | -0.573 | -0.582 | -1.107 | Down |
|  | NCF2         | -1.029 | -1.021 | -1.946 | Down |
|  | UTS2R        | -0.622 | -0.635 | -1.22  | Down |
|  | LBX1         | -0.506 | -0.508 | -1.003 | Down |
|  | PELI3        | -1.348 | -1.43  | -2.612 | Down |
|  | LOC643551    | -0.521 | -0.57  | -1.028 | Down |
|  | NEIL2        | -0.572 | -0.634 | -1.13  | Down |
|  | GALR3        | -0.604 | -0.689 | -1.209 | Down |
|  | WDR61        | -0.648 | -0.708 | -1.263 | Down |
|  | LOC727788    | -0.537 | -0.571 | -1.012 | Down |
|  | DKFZp547G183 | -0.743 | -0.77  | -1.396 | Down |
|  | SSTR3        | -0.521 | -0.576 | -1.063 | Down |
|  | FAM86B1      | -0.613 | -0.699 | -1.259 | Down |
|  | RAG1         | -0.63  | -0.709 | -1.325 | Down |
|  | SYTL4        | -0.172 | -0.646 | -1.039 | Down |
|  | TMEM102      | -0.389 | -1.517 | -2.393 | Down |
|  | HNRNPA1L2    | -0.332 | -1.369 | -2.168 | Down |
|  | FLJ35776     | -0.207 | -0.801 | -1.297 | Down |
|  | AGGF1        | -0.233 | -0.954 | -1.549 | Down |
|  | FUK          | -0.233 | -0.931 | -1.543 | Down |
|  | RAB3A        | -0.277 | -1.236 | -1.947 | Down |
|  | C11orf2      | -0.153 | -0.705 | -1.129 | Down |
|  | ZC3H6        | -0.197 | -0.93  | -1.452 | Down |

|              |        |        |        |      |
|--------------|--------|--------|--------|------|
| POPODC3      | -0.28  | -1.184 | -1.821 | Down |
| PEBP4        | -0.363 | -1.603 | -2.414 | Down |
| SCN1B        | -0.204 | -0.845 | -1.303 | Down |
| VMO1         | -0.301 | -1.402 | -2.133 | Down |
| MIF4GD       | -0.206 | -1.029 | -1.562 | Down |
| EVL          | -0.213 | -1.041 | -1.54  | Down |
| DFNB59       | -0.268 | -1.223 | -1.792 | Down |
| UBE2Q2       | -0.222 | -0.707 | -1.096 | Down |
| TTL1         | -0.474 | -1.507 | -2.394 | Down |
| TCHP         | -0.42  | -1.301 | -2.017 | Down |
| RDBP         | -0.523 | -1.586 | -2.451 | Down |
| CSK          | -0.364 | -1.244 | -1.995 | Down |
| ALDH16A1     | -0.198 | -0.664 | -1.049 | Down |
| KIF3C        | -0.326 | -1.11  | -1.736 | Down |
| TRIM16L      | -0.451 | -1.543 | -2.489 | Down |
| HR           | -0.257 | -0.965 | -1.453 | Down |
| GATS         | -0.384 | -1.343 | -2.036 | Down |
| SERGEF       | -0.188 | -0.709 | -1.051 | Down |
| NTSDC2       | -0.195 | -0.732 | -1.093 | Down |
| KRTAP3-3     | -0.205 | -0.724 | -1.088 | Down |
| CCNI         | -0.256 | -0.908 | -1.39  | Down |
| C4orf33      | -0.277 | -0.965 | -1.482 | Down |
| HADH         | -0.22  | -0.866 | -1.281 | Down |
| ARRB2        | -0.203 | -0.815 | -1.177 | Down |
| PLA2G16      | -0.186 | -0.722 | -1.036 | Down |
| ANXA4        | -0.34  | -1.488 | -2.122 | Down |
| SIPR4        | -0.198 | -0.783 | -1.073 | Down |
| MAPT         | -0.397 | -1.503 | -2.05  | Down |
| HPDL         | -0.393 | -1.605 | -2.239 | Down |
| FRMD3        | -0.241 | -0.988 | -1.36  | Down |
| PTPRA        | -0.362 | -1.48  | -2.021 | Down |
| C3orf39      | -0.295 | -0.954 | -1.334 | Down |
| ACAA1        | -0.323 | -1.042 | -1.448 | Down |
| FAM13A       | -0.259 | -0.864 | -1.202 | Down |
| MC1R         | -0.332 | -1.09  | -1.52  | Down |
| CCDC53       | -0.432 | -1.341 | -1.885 | Down |
| BBS9         | -0.231 | -0.814 | -1.158 | Down |
| SARS2        | -0.146 | -0.761 | -1.072 | Down |
| RDM1         | -0.324 | -1.562 | -2.23  | Down |
| MAP6         | -0.17  | -0.847 | -1.207 | Down |
| ACOX2        | -0.435 | -2.809 | -3.998 | Down |
| TMEM66       | -0.291 | -0.881 | -1.274 | Down |
| SIPR3        | -0.358 | -1.098 | -1.579 | Down |
| SLC37A4      | -0.413 | -1.262 | -1.881 | Down |
| OAZ1         | -0.331 | -1.069 | -1.568 | Down |
| MYOSC        | -0.261 | -0.767 | -1.159 | Down |
| MYH10        | -0.515 | -1.576 | -2.357 | Down |
| MLST8        | -0.288 | -0.824 | -1.254 | Down |
| KAT2A        | -0.504 | -1.484 | -2.245 | Down |
| TTC30B       | -1.068 | -2.536 | -3.963 | Down |
| TPCN1        | -0.463 | -1.128 | -1.76  | Down |
| RNASEH2A     | -0.466 | -1.163 | -1.785 | Down |
| NIPSNAP1     | -0.433 | -1.076 | -1.645 | Down |
| POLL         | -0.397 | -1.034 | -1.597 | Down |
| HES2         | -0.457 | -1.188 | -1.845 | Down |
| ZNF358       | -0.539 | -1.345 | -2.101 | Down |
| NR2E3        | -0.284 | -0.78  | -1.157 | Down |
| LCMT1        | -0.433 | -1.132 | -1.692 | Down |
| PLD2         | -0.56  | -1.464 | -2.188 | Down |
| PDE8B        | -0.788 | -2.202 | -3.475 | Down |
| HGSNAT       | -0.258 | -0.753 | -1.17  | Down |
| UBL7         | -0.265 | -0.751 | -1.168 | Down |
| SLC27A2      | -0.457 | -1.301 | -1.994 | Down |
| SDSL         | -0.614 | -1.659 | -2.577 | Down |
| WFS1         | -0.356 | -1     | -1.589 | Down |
| ST6GALNAC4   | -0.336 | -0.91  | -1.458 | Down |
| TSEN54       | -0.502 | -1.25  | -2.073 | Down |
| LOC100130506 | -0.302 | -0.775 | -1.302 | Down |
| HEXDC        | -0.853 | -1.885 | -3.188 | Down |
| EPB41L4A     | -0.941 | -2.086 | -3.446 | Down |
| UFSP1        | -0.609 | -1.454 | -2.384 | Down |
| OR5L2        | -0.676 | -1.521 | -2.613 | Down |
| NR5A2        | -0.298 | -0.685 | -1.151 | Down |
| PREB         | -0.357 | -0.833 | -1.425 | Down |
| NIPAL3       | -0.478 | -1.153 | -1.982 | Down |
| PGLS         | -0.346 | -0.778 | -1.342 | Down |
| GGTLC1       | -0.402 | -0.904 | -1.598 | Down |
| FLJ32065     | -0.333 | -0.712 | -1.238 | Down |
| AMZ2         | -0.445 | -0.98  | -1.68  | Down |
| RECQL5       | -0.37  | -0.867 | -1.531 | Down |
| FCHO1        | -0.569 | -1.277 | -2.368 | Down |
| DOCK11       | -0.52  | -1.07  | -2.02  | Down |
| CPSF4        | -0.29  | -0.615 | -1.124 | Down |
| C17orf108    | -0.819 | -1.71  | -3.2   | Down |
| LOC400099    | -1.029 | -2.144 | -3.854 | Down |
| LOC100129888 | -0.676 | -1.435 | -2.548 | Down |
| OASL         | -0.545 | -1.12  | -1.984 | Down |
| DFNA5        | -0.284 | -0.602 | -1.097 | Down |

|              |        |        |        |      |
|--------------|--------|--------|--------|------|
| CREB3L4      | -0.751 | -1.531 | -2.784 | Down |
| ZNF395       | -0.39  | -0.844 | -1.507 | Down |
| SQRDL        | -0.418 | -1.123 | -1.927 | Down |
| LOC440104    | -0.327 | -0.871 | -1.498 | Down |
| LOC91948     | -0.645 | -1.676 | -2.88  | Down |
| LFNG         | -0.35  | -0.865 | -1.501 | Down |
| SLC22A18     | -0.321 | -0.87  | -1.555 | Down |
| FAM55C       | -0.625 | -1.619 | -2.886 | Down |
| ZMYND8       | -0.564 | -1.467 | -2.591 | Down |
| GALT         | -0.316 | -0.989 | -1.753 | Down |
| DYRK4        | -0.21  | -0.671 | -1.208 | Down |
| RSPH3        | -0.189 | -0.623 | -1.112 | Down |
| RICH2        | -0.221 | -0.717 | -1.262 | Down |
| PGM5P2       | -0.156 | -0.583 | -1.037 | Down |
| HEXIM1       | -0.276 | -1.055 | -1.848 | Down |
| MEGF8        | -0.311 | -1.061 | -1.907 | Down |
| GSDMD        | -0.345 | -1.241 | -2.252 | Down |
| FAM81A       | -0.377 | -1.356 | -2.532 | Down |
| CD44         | -0.235 | -0.799 | -1.472 | Down |
| MDP1         | -0.297 | -1.01  | -1.887 | Down |
| HEXIM2       | -0.786 | -2.445 | -4.179 | Down |
| AMACR        | -0.378 | -1.16  | -2.009 | Down |
| TMEM159      | -0.292 | -0.863 | -1.463 | Down |
| CXorf42      | -0.432 | -1.262 | -2.126 | Down |
| C2orf74      | -0.333 | -0.974 | -1.655 | Down |
| OSBPL1A      | -0.396 | -1.27  | -2.162 | Down |
| NIPSNAP3A    | -0.43  | -1.404 | -2.364 | Down |
| PHKB         | -0.348 | -1.081 | -1.905 | Down |
| MTUS1        | -0.488 | -1.455 | -2.529 | Down |
| LOC730202    | -0.29  | -1.089 | -1.803 | Down |
| CDON         | -0.341 | -1.255 | -2.12  | Down |
| SRI          | -0.215 | -0.763 | -1.311 | Down |
| KBTBD3       | -0.247 | -0.756 | -1.406 | Down |
| DEPDC6       | -0.235 | -0.684 | -1.286 | Down |
| ZNF483       | -0.268 | -0.755 | -1.404 | Down |
| C6orf176     | -0.719 | -2.018 | -3.868 | Down |
| AKR1C3       | -0.272 | -0.746 | -1.409 | Down |
| RBL2         | -0.318 | -0.89  | -1.712 | Down |
| P2RY6        | -0.424 | -1.153 | -2.097 | Down |
| MSH2         | -0.34  | -0.934 | -1.706 | Down |
| PWP2         | -0.206 | -0.584 | -1.038 | Down |
| RBBP7        | -0.223 | -0.592 | -1.111 | Down |
| LOC149401    | -0.221 | -0.576 | -1.088 | Down |
| IMPDH2       | -0.434 | -1.104 | -2.046 | Down |
| FASTK        | -0.292 | -0.788 | -1.449 | Down |
| FAM189B      | -0.396 | -1.016 | -1.904 | Down |
| EIF2B3       | -0.423 | -1.072 | -2.053 | Down |
| RHOBTB1      | -0.659 | -1.744 | -3.225 | Down |
| CNPY2        | -0.783 | -1.931 | -3.756 | Down |
| ARSE         | -0.398 | -0.961 | -1.844 | Down |
| SNX7         | -0.235 | -0.604 | -1.154 | Down |
| LOC100144604 | -0.259 | -0.652 | -1.254 | Down |
| HAUS4        | -0.244 | -0.581 | -1.118 | Down |
| FECH         | -0.24  | -0.553 | -1.073 | Down |
| FAM71E1      | -0.283 | -0.657 | -1.285 | Down |
| SPATA20      | -0.244 | -0.564 | -1.086 | Down |
| DDIT4L       | -0.647 | -1.648 | -3.284 | Down |
| BRD3         | -0.208 | -0.507 | -1.014 | Down |
| TACC2        | -0.259 | -0.634 | -1.255 | Down |
| hCG_2003663  | -0.832 | -2.02  | -3.976 | Down |
| ZNF18        | -0.754 | -1.762 | -3.484 | Down |
| LOC81691     | -0.017 | -0.48  | -1.083 | Down |
| C6orf154     | -0.013 | -1.163 | -2.605 | Down |
| NPHP1        | -0.014 | -0.635 | -1.489 | Down |
| TWF2         | -0.033 | -0.565 | -1.286 | Down |
| STEAP3       | -0.041 | -0.762 | -1.715 | Down |
| PEX6         | -0.036 | -0.76  | -1.703 | Down |
| DTWD2        | -0.034 | -0.471 | -1.045 | Down |
| PYGB         | -0.048 | -0.641 | -1.513 | Down |
| ATG4C        | -0.039 | -0.609 | -1.408 | Down |
| ACOT13       | -0.038 | -0.558 | -1.269 | Down |
| OSBPL7       | -0.049 | -1.154 | -2.471 | Down |
| LOC100131938 | -0.025 | -0.571 | -1.256 | Down |
| PYROXD2      | -0.104 | -0.582 | -1.542 | Down |
| MYO19        | -0.111 | -0.556 | -1.472 | Down |
| HS3ST1       | -0.22  | -1.288 | -3.338 | Down |
| DPH5         | -0.12  | -0.709 | -1.782 | Down |
| DALRD3       | -0.082 | -0.533 | -1.349 | Down |
| ATP7B        | -0.115 | -0.678 | -1.716 | Down |
| LOC100130111 | -0.187 | -0.884 | -2.15  | Down |
| FAM167A      | -0.09  | -0.459 | -1.092 | Down |
| PDK4         | -0.125 | -0.589 | -1.429 | Down |
| LIMK1        | -0.156 | -0.732 | -1.889 | Down |
| CAPN5        | -0.255 | -1.23  | -3.096 | Down |
| MAML3        | -0.141 | -0.604 | -1.521 | Down |
| RSAD1        | -0.141 | -0.942 | -2.299 | Down |
| MRPS26       | -0.131 | -0.866 | -2.125 | Down |
| FAHD2A       | -0.075 | -0.443 | -1.073 | Down |

|              |        |        |        |      |
|--------------|--------|--------|--------|------|
| DGKG         | -0.148 | -0.925 | -2.239 | Down |
| RTEL1        | -0.076 | -0.509 | -1.205 | Down |
| PSD4         | -0.081 | -0.479 | -1.117 | Down |
| MVP          | -0.08  | -0.545 | -1.273 | Down |
| PALMD        | -0.047 | -0.42  | -1.02  | Down |
| MPST         | -0.109 | -0.974 | -2.283 | Down |
| TMEM117      | -0.104 | -0.68  | -1.453 | Down |
| HSPC157      | -0.121 | -0.869 | -1.887 | Down |
| CYBASC3      | -0.109 | -0.729 | -1.6   | Down |
| ALDH3B1      | -0.136 | -0.811 | -1.773 | Down |
| RNF135       | -0.172 | -0.93  | -2.121 | Down |
| GLI4         | -0.141 | -0.785 | -1.758 | Down |
| TUBAL3       | -0.09  | -0.46  | -1.031 | Down |
| PPOX         | -0.181 | -0.852 | -1.903 | Down |
| MYO15B       | -0.15  | -0.645 | -1.468 | Down |
| PDCD2L       | -0.238 | -1.007 | -2.282 | Down |
| MRPL24       | -0.151 | -0.618 | -1.373 | Down |
| LEPREL2      | -0.188 | -0.791 | -1.723 | Down |
| FHOD1        | -0.131 | -0.53  | -1.17  | Down |
| PPAPDC2      | -0.141 | -0.518 | -1.171 | Down |
| C12orf10     | -0.165 | -0.596 | -1.352 | Down |
| ZNF133       | -0.134 | -0.53  | -1.185 | Down |
| POLR3GL      | -0.301 | -1.082 | -2.382 | Down |
| NTSM         | -0.298 | -1.047 | -2.308 | Down |
| FAM120C      | -0.121 | -0.557 | -1.183 | Down |
| NDUFB10      | -0.281 | -0.974 | -2.405 | Down |
| NARF         | -0.138 | -0.518 | -1.297 | Down |
| NCRNA00173   | -0.395 | -1.538 | -3.757 | Down |
| ITFG3        | -0.182 | -0.741 | -1.791 | Down |
| CUL9         | -0.283 | -0.963 | -2.252 | Down |
| AGPHD1       | -0.169 | -0.542 | -1.269 | Down |
| ZNF839       | -0.291 | -1.001 | -2.284 | Down |
| TBC1D22A     | -0.127 | -0.438 | -1.045 | Down |
| MBOAT1       | -0.191 | -0.689 | -1.639 | Down |
| RNF130       | -0.118 | -0.426 | -1.005 | Down |
| GALK1        | -0.248 | -0.811 | -1.916 | Down |
| LOC100170939 | -0.22  | -0.694 | -1.569 | Down |
| C21orf59     | -0.183 | -0.571 | -1.291 | Down |
| ZNF514       | -0.192 | -0.548 | -1.233 | Down |
| CPOX         | -0.339 | -1.014 | -2.341 | Down |
| C10orf114    | -0.331 | -0.94  | -2.206 | Down |
| PBX1         | -0.461 | -1.361 | -3.206 | Down |
| VTI1B        | -0.171 | -0.437 | -1.049 | Down |
| LOC283267    | -0.169 | -0.432 | -1.014 | Down |
| GNPAT        | -0.202 | -0.519 | -1.284 | Down |
| C9orf23      | -0.347 | -0.833 | -2.057 | Down |
| PYDC1        | -0.35  | -0.923 | -2.252 | Down |
| RAB3D        | -0.197 | -1.01  | -1.726 | Down |
| LXN          | -0.322 | -1.713 | -2.935 | Down |
| TAF6L        | -0.165 | -0.751 | -1.257 | Down |
| C20orf54     | -0.17  | -0.748 | -1.299 | Down |
| ACACB        | -0.178 | -0.807 | -1.394 | Down |
| ST3GAL2      | -0.167 | -0.699 | -1.233 | Down |
| TENC1        | -0.262 | -1.425 | -2.367 | Down |
| LOC100134259 | -0.407 | -2.176 | -3.517 | Down |
| C7orf27      | -0.15  | -0.839 | -1.47  | Down |
| AAAS         | -0.159 | -0.882 | -1.551 | Down |
| JUP          | -0.212 | -1.141 | -2.016 | Down |
| LTBP1        | -0.115 | -0.661 | -1.191 | Down |
| C11orf65     | -0.102 | -0.576 | -1.058 | Down |
| C14orf167    | -0.073 | -0.594 | -1.038 | Down |
| BCS1L        | -0.065 | -0.635 | -1.117 | Down |
| TEX264       | -0.102 | -0.878 | -1.51  | Down |
| MRH          | -0.069 | -0.699 | -1.237 | Down |
| DLL3         | -0.068 | -0.809 | -1.386 | Down |
| SLC7A7       | -0.089 | -0.733 | -1.235 | Down |
| NDUFV2       | -0.098 | -0.691 | -1.177 | Down |
| MON1A        | -0.227 | -0.781 | -1.562 | Down |
| ETHE1        | -0.181 | -0.632 | -1.274 | Down |
| LOC93622     | -0.344 | -1.143 | -2.233 | Down |
| GGT1         | -0.185 | -0.595 | -1.169 | Down |
| STAT2        | -0.215 | -0.686 | -1.348 | Down |
| LRRC37A3     | -0.203 | -0.681 | -1.341 | Down |
| EML3         | -0.187 | -0.691 | -1.431 | Down |
| C22orf36     | -0.249 | -1.002 | -2.075 | Down |
| NTHL1        | -0.578 | -2.053 | -4.312 | Down |
| HOXB13       | -0.66  | -2.424 | -5.066 | Down |
| LIPT2        | -0.433 | -2.074 | -3.758 | Down |
| CXXC5        | -0.337 | -1.47  | -2.68  | Down |
| NSMCE4A      | -0.254 | -1.062 | -1.939 | Down |
| LOC100129791 | -0.156 | -0.588 | -1.103 | Down |
| HOXB5        | -0.29  | -1.123 | -2.103 | Down |
| GGT3P        | -0.125 | -0.561 | -1.053 | Down |
| APBB1IP      | -0.144 | -0.586 | -1.096 | Down |
| TST          | -0.435 | -1.758 | -3.378 | Down |
| QARS         | -0.335 | -1.308 | -2.487 | Down |
| PYGL         | -0.158 | -0.84  | -1.618 | Down |
| FAM185A      | -0.259 | -1.184 | -2.265 | Down |

|  |              |        |        |        |      |
|--|--------------|--------|--------|--------|------|
|  | ANKRD30A     | -0.186 | -0.906 | -1.757 | Down |
|  | DIXDC1       | -0.493 | -2.069 | -4.091 | Down |
|  | ZMYM3        | -0.06  | -0.999 | -1.789 | Down |
|  | COL4A4       | -0.031 | -0.596 | -1.065 | Down |
|  | NEIL3        | -0.061 | -1.025 | -1.904 | Down |
|  | LANCL1       | -0.075 | -0.816 | -1.506 | Down |
|  | CCDC52       | -0.016 | -0.737 | -1.329 | Down |
|  | BACE1        | -0.011 | -0.635 | -1.149 | Down |
|  | NETO2        | -0.018 | -0.92  | -1.701 | Down |
|  | LOC100289097 | 0.027  | -0.564 | -1.059 | Down |
|  | SSBP4        | 0.014  | -0.852 | -1.635 | Down |
|  | TSHZ1        | 0.006  | -0.732 | -1.396 | Down |
|  | SPATA17      | 0.006  | -0.578 | -1.073 | Down |
|  | SAMD11       | 0      | -0.633 | -1.259 | Down |
|  | MAF1         | 0      | -0.607 | -1.204 | Down |
|  | C10orf75     | -0.052 | -0.645 | -1.362 | Down |
|  | BFSPI        | -0.101 | -1.19  | -2.561 | Down |
|  | SCARA5       | -0.284 | -2.588 | -5.719 | Down |
|  | FGA          | -0.056 | -0.516 | -1.058 | Down |
|  | ADCK2        | -0.106 | -1.009 | -2.085 | Down |
|  | TREX1        | -0.158 | -1.156 | -2.364 | Down |
|  | RRBP1        | -0.037 | -0.527 | -1.047 | Down |
|  | LOC147727    | -0.064 | -0.85  | -1.698 | Down |
|  | NOL3         | -0.095 | -0.579 | -1.103 | Down |
|  | GGTLC2       | -0.101 | -0.631 | -1.217 | Down |
|  | LOC100128501 | -0.092 | -0.593 | -1.173 | Down |
|  | ABCA7        | -0.145 | -1.056 | -2.066 | Down |
|  | PHF14        | -0.123 | -0.762 | -1.524 | Down |
|  | FUT8         | -0.207 | -1.202 | -2.471 | Down |
|  | AKRIC1       | -0.12  | -0.626 | -1.248 | Down |
|  | SPSB2        | -0.167 | -1.482 | -2.824 | Down |
|  | SIPA1L2      | -0.075 | -0.594 | -1.118 | Down |
|  | LTA4H        | -0.077 | -0.864 | -1.645 | Down |
|  | LENG9        | -0.069 | -0.76  | -1.459 | Down |
|  | RTKN         | -0.407 | -0.982 | -2.759 | Down |
|  | ALKBH2       | -0.287 | -0.678 | -1.866 | Down |
|  | TMEM116      | -0.277 | -0.638 | -1.775 | Down |
|  | EBAG9        | -0.28  | -0.618 | -1.766 | Down |
|  | CBR1         | -0.467 | -0.999 | -2.645 | Down |
|  | C20orf141    | -0.383 | -0.829 | -2.244 | Down |
|  | MLKL         | -0.303 | -0.719 | -1.861 | Down |
|  | IFT172       | -0.319 | -0.703 | -1.836 | Down |
|  | SPATA21      | -0.241 | -0.501 | -1.311 | Down |
|  | LOC653391    | -0.257 | -0.616 | -1.629 | Down |
|  | ALX1         | -0.312 | -0.776 | -2.031 | Down |
|  | FAM69B       | -0.206 | -0.635 | -1.617 | Down |
|  | CCR7         | -0.586 | -1.721 | -4.475 | Down |
|  | C7orf68      | -0.349 | -0.97  | -2.506 | Down |
|  | C8orf40      | -0.234 | -0.682 | -1.7   | Down |
|  | IER5L        | -0.154 | -0.454 | -1.234 | Down |
|  | C1orf131     | -0.189 | -0.602 | -1.617 | Down |
|  | HMBS         | -0.46  | -0.856 | -2.063 | Down |
|  | ALDH3A2      | -0.311 | -0.585 | -1.445 | Down |
|  | MAGEH1       | -0.794 | -1.486 | -3.767 | Down |
|  | C5orf58      | -0.904 | -1.723 | -4.385 | Down |
|  | LOC100290344 | -0.471 | -0.828 | -2.159 | Down |
|  | PCIF1        | -0.231 | -0.404 | -1.022 | Down |
|  | MRPL17       | -0.345 | -0.631 | -1.59  | Down |
|  | LOC100133008 | -0.396 | -0.736 | -1.976 | Down |
|  | HGD          | -0.693 | -1.352 | -3.532 | Down |
|  | WNK1         | -0.257 | -0.496 | -1.349 | Down |
|  | TBC1D16      | -0.484 | -0.909 | -2.443 | Down |
|  | LOC153684    | -0.505 | -0.798 | -2.423 | Down |
|  | ETV6         | -0.411 | -0.695 | -2.113 | Down |
|  | FZD3         | -0.267 | -0.495 | -1.443 | Down |
|  | C8orf55      | -0.431 | -0.756 | -2.192 | Down |
|  | KRTAP19-2    | -0.416 | -0.704 | -2.035 | Down |
|  | ANKRD36B     | -0.441 | -0.71  | -2.101 | Down |
|  | HOXC4        | -0.528 | -0.917 | -2.657 | Down |
|  | ZNF618       | -0.43  | -0.768 | -2.12  | Down |
|  | C3orf1       | -0.405 | -0.686 | -1.924 | Down |
|  | VPS26B       | -0.449 | -0.946 | -1.958 | Down |
|  | SYT17        | -0.925 | -1.903 | -4.023 | Down |
|  | SFXN3        | -0.23  | -0.474 | -1.022 | Down |
|  | LOC100293090 | -0.504 | -1.047 | -2.204 | Down |
|  | KRCC1        | -0.814 | -1.791 | -3.642 | Down |
|  | CSRP2BP      | -1.357 | -3.055 | -6.16  | Down |
|  | TRIM45       | -0.702 | -1.509 | -3.099 | Down |
|  | GOLGA5       | -0.204 | -0.46  | -1.002 | Down |
|  | CYB5B        | -0.604 | -1.292 | -2.82  | Down |
|  | LOC390282    | -0.338 | -0.734 | -1.57  | Down |
|  | C3orf31      | -0.724 | -1.615 | -3.408 | Down |
|  | QDPR         | -0.443 | -0.943 | -2.029 | Down |
|  | LPIN3        | -0.313 | -0.66  | -1.459 | Down |
|  | KIAA0485     | -0.682 | -1.244 | -2.803 | Down |
|  | GOLGA3       | -0.356 | -0.631 | -1.456 | Down |
|  | ZNF580       | -0.269 | -0.464 | -1.077 | Down |
|  | TBCK         | -0.618 | -1.172 | -2.669 | Down |



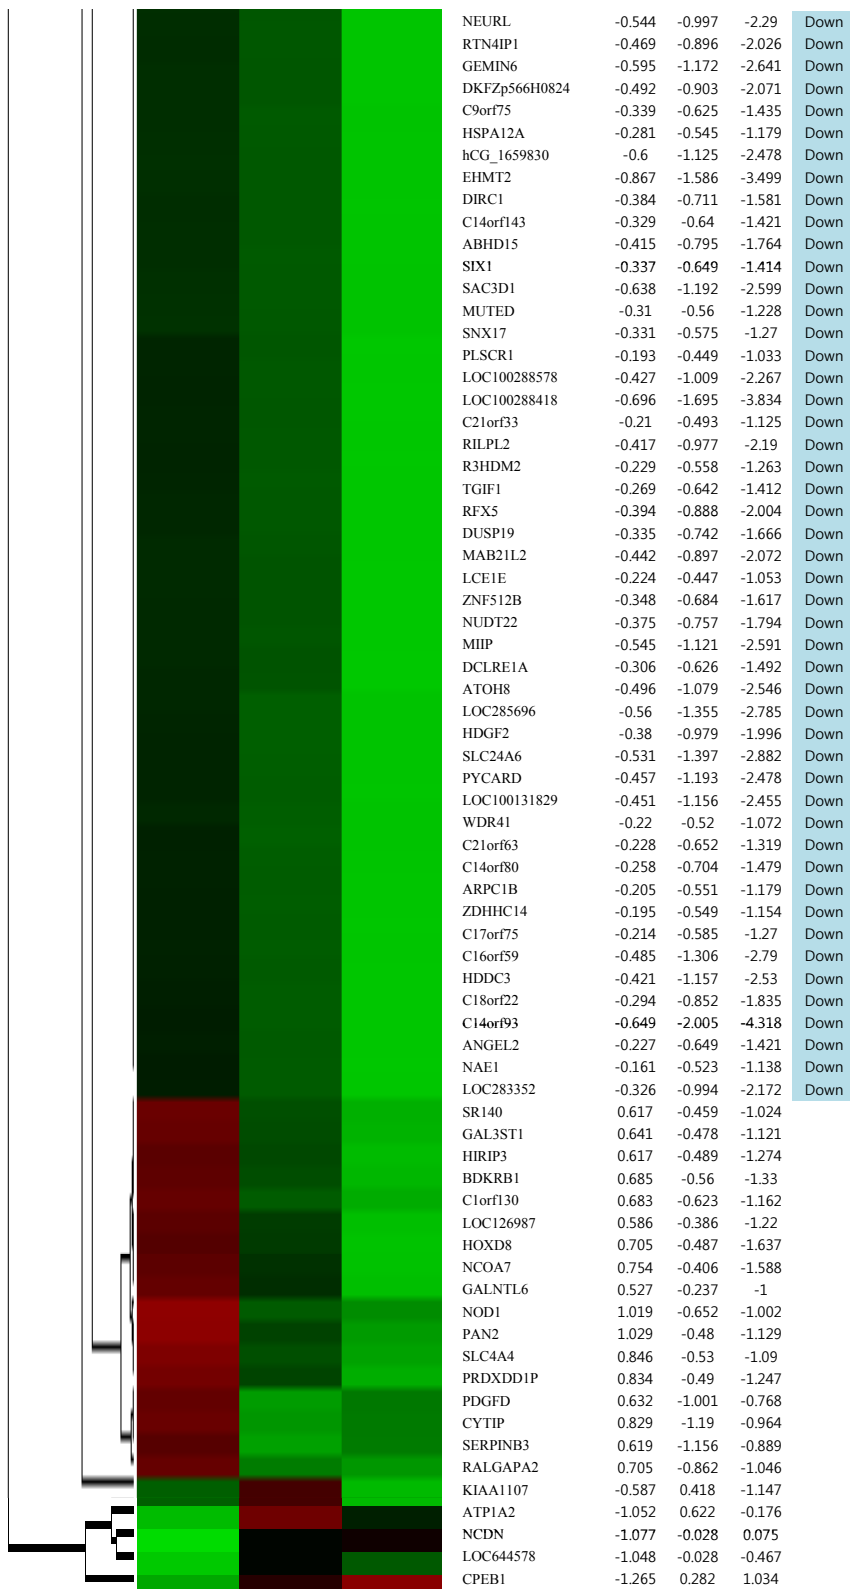

**Supplementary Table 3.** Summary of reaction conditions and primer sequences for semi-qPCR.

| Genes    | Primers   | Sequence (5'→3')       | Tm(°C) | Cycles | Size (bp) |
|----------|-----------|------------------------|--------|--------|-----------|
| FOSB     | Sense     | ACCCTCTGCCGAGTCTCAAT   | 60     | 30     | 109       |
|          | Antisense | GAAGGAACCGGGCATTTC     |        |        |           |
| IL8      | Sense     | CAAGAGCCAGGAAGAAACCA   | 60     | 30     | 137       |
|          | Antisense | AGCACTCCTTGGCAAACTG    |        |        |           |
| MAFF     | Sense     | AGACGCGCGTGTGTGA       | 60     | 30     | 100       |
|          | Antisense | CTGGATAGGGGATCCACAGA   |        |        |           |
| DDIT3    | Sense     | CCAAAATCAGAGCTGGAACC   | 60     | 30     | 115       |
|          | Antisense | CCATCTCTGCAGTTGGATCA   |        |        |           |
| SERPINE1 | Sense     | ACAACAGGAGGAGAAACCCA   | 60     | 30     | 101       |
|          | Antisense | AGCTCCTTGTACAGATGCCG   |        |        |           |
| CSRP2BP  | Sense     | GGAGCCAAAGAAGGAGGAAT   | 60     | 30     | 124       |
|          | Antisense | GTCGAAATCCCTTCCTGGAC   |        |        |           |
| SCARA5   | Sense     | TCTTCCTGATTCTTGTGGGC   | 60     | 30     | 118       |
|          | Antisense | AAGTCCCGGAAGCTCTCATT   |        |        |           |
| HOXB13   | Sense     | GTTGCCAGGGAGAACAGAAC   | 60     | 30     | 125       |
|          | Antisense | GCTGTACGGAATGCGTTTCT   |        |        |           |
| FOXS1    | Sense     | GACAACCACACAGAAAGCCA   | 60     | 30     | 105       |
|          | Antisense | GAGTAAATCCCAAGAGGCCC   |        |        |           |
| DACT2    | Sense     | GGCAACATCATATCCCCATC   | 60     | 30     | 192       |
|          | Antisense | AGGCCTGTCCAGTAGAAGCA   |        |        |           |
| β-Actin  | Sense     | CTGGAGAAGAGCTACGAGCTGC | 60     | 30     | 423       |
|          | Antisense | CTAGAAGCATTTGCGGTGGACG |        |        |           |
| GAPDH    | Sense     | AAGGCTGAGAACGGGAAG     | 60     | 30     | 114       |
|          | Antisense | GGACTCCACGACGTACTC     |        |        |           |

**Supplementary Table 4.** Full list of GO terms (FDR<0.01) associated with the Up- and Down-patterns by EEDS treatment in A549 cells.

| GO ID               | GO terms                                                                                     | <i>p</i> -value* | FDR**    |
|---------------------|----------------------------------------------------------------------------------------------|------------------|----------|
| <b>Down-pattern</b> |                                                                                              |                  |          |
| GO:0051188          | Cofactor biosynthetic process                                                                | 9.26E-08         | 2.57E-04 |
| GO:0051186          | Cofactor metabolic process                                                                   | 1.79E-07         | 2.49E-04 |
| GO:0018130          | Heterocycle biosynthetic process                                                             | 8.03E-07         | 7.42E-04 |
| GO:0044271          | Nitrogen compound biosynthetic process                                                       | 6.15E-06         | 4.25E-03 |
| GO:0006399          | tRNA metabolic process                                                                       | 1.65E-05         | 9.12E-03 |
| <b>Up-pattern</b>   |                                                                                              |                  |          |
| GO:0045449          | Regulation of transcription                                                                  | 4.21E-26         | 1.55E-22 |
| GO:0006350          | Transcription                                                                                | 3.75E-21         | 6.91E-18 |
| GO:0006355          | Regulation of transcription, DNA-dependent                                                   | 3.11E-14         | 3.82E-11 |
| GO:0051252          | Regulation of RNA metabolic process                                                          | 3.78E-14         | 3.49E-11 |
| GO:0006357          | Regulation of transcription from RNA polymerase II promoter                                  | 2.05E-13         | 1.51E-10 |
| GO:0042325          | Regulation of phosphorylation                                                                | 2.03E-11         | 1.25E-08 |
| GO:0051173          | Positive regulation of nitrogen compound metabolic process                                   | 2.39E-11         | 1.26E-08 |
| GO:0045859          | Regulation of protein kinase activity                                                        | 2.44E-11         | 1.12E-08 |
| GO:0019220          | Regulation of phosphate metabolic process                                                    | 2.68E-11         | 1.10E-08 |
| GO:0051174          | Regulation of phosphorus metabolic process                                                   | 2.68E-11         | 1.10E-08 |
| GO:0043549          | Regulation of kinase activity                                                                | 1.23E-10         | 4.54E-08 |
| GO:0045935          | Positive regulation of nucleobase, nucleoside, nucleotide and nucleic acid metabolic process | 1.80E-10         | 6.04E-08 |
| GO:0009891          | Positive regulation of biosynthetic process                                                  | 2.68E-10         | 8.23E-08 |
| GO:0051338          | Regulation of transferase activity                                                           | 3.18E-10         | 9.02E-08 |
| GO:0012501          | Programmed cell death                                                                        | 3.42E-10         | 9.00E-08 |
| GO:0042981          | Regulation of apoptosis                                                                      | 4.67E-10         | 1.15E-07 |
| GO:0031328          | Positive regulation of cellular biosynthetic process                                         | 4.89E-10         | 1.13E-07 |
| GO:0010558          | Negative regulation of macromolecule biosynthetic process                                    | 7.90E-10         | 1.71E-07 |
| GO:0043067          | Regulation of programmed cell death                                                          | 8.82E-10         | 1.81E-07 |
| GO:0009890          | Negative regulation of biosynthetic process                                                  | 9.00E-10         | 1.75E-07 |
| GO:0010941          | Regulation of cell death                                                                     | 1.11E-09         | 2.04E-07 |
| GO:0010557          | Positive regulation of macromolecule biosynthetic process                                    | 1.29E-09         | 2.26E-07 |
| GO:0006915          | Apoptosis                                                                                    | 1.49E-09         | 2.50E-07 |
| GO:0016265          | Death                                                                                        | 1.91E-09         | 3.06E-07 |
| GO:0008219          | Cell death                                                                                   | 2.52E-09         | 3.88E-07 |

|            |                                                                                              |          |          |
|------------|----------------------------------------------------------------------------------------------|----------|----------|
| GO:0051254 | Positive regulation of RNA metabolic process                                                 | 2.91E-09 | 4.30E-07 |
| GO:0031327 | Negative regulation of cellular biosynthetic process                                         | 6.29E-09 | 8.92E-07 |
| GO:0010629 | Negative regulation of gene expression                                                       | 6.81E-09 | 9.29E-07 |
| GO:0045941 | Positive regulation of transcription                                                         | 6.87E-09 | 9.04E-07 |
| GO:0010604 | Positive regulation of macromolecule metabolic process                                       | 6.87E-09 | 8.73E-07 |
| GO:0010628 | Positive regulation of gene expression                                                       | 7.07E-09 | 8.69E-07 |
| GO:0045893 | Positive regulation of transcription, DNA-dependent                                          | 9.74E-09 | 1.16E-06 |
| GO:0016481 | Negative regulation of transcription                                                         | 2.21E-08 | 2.54E-06 |
| GO:0043066 | Negative regulation of apoptosis                                                             | 4.16E-08 | 4.64E-06 |
| GO:0043069 | Negative regulation of programmed cell death                                                 | 7.16E-08 | 7.76E-06 |
| GO:0060548 | Negative regulation of cell death                                                            | 7.93E-08 | 8.35E-06 |
| GO:0010627 | Regulation of protein kinase cascade                                                         | 1.81E-07 | 1.85E-05 |
| GO:0051172 | Negative regulation of nitrogen compound metabolic process                                   | 2.38E-07 | 2.37E-05 |
| GO:0045934 | Negative regulation of nucleobase, nucleoside, nucleotide and nucleic acid metabolic process | 2.68E-07 | 2.60E-05 |
| GO:0010605 | Negative regulation of macromolecule metabolic process                                       | 3.36E-07 | 3.18E-05 |
| GO:0045944 | Positive regulation of transcription from RNA polymerase II promoter                         | 5.41E-07 | 4.99E-05 |
| GO:0033673 | Negative regulation of kinase activity                                                       | 6.15E-07 | 5.52E-05 |
| GO:0006469 | Negative regulation of protein kinase activity                                               | 1.24E-06 | 1.09E-04 |
| GO:0045892 | Negative regulation of transcription, DNA-dependent                                          | 1.47E-06 | 1.26E-04 |
| GO:0043405 | Regulation of MAP kinase activity                                                            | 1.56E-06 | 1.31E-04 |
| GO:0045860 | Positive regulation of protein kinase activity                                               | 1.98E-06 | 1.62E-04 |
| GO:0051348 | Negative regulation of transferase activity                                                  | 2.17E-06 | 1.74E-04 |
| GO:0051253 | Negative regulation of RNA metabolic process                                                 | 2.56E-06 | 2.01E-04 |
| GO:0033674 | Positive regulation of kinase activity                                                       | 5.05E-06 | 3.88E-04 |
| GO:0051347 | Positive regulation of transferase activity                                                  | 5.77E-06 | 4.34E-04 |
| GO:0010740 | Positive regulation of protein kinase cascade                                                | 8.54E-06 | 6.29E-04 |
| GO:0009967 | Positive regulation of signal transduction                                                   | 1.05E-05 | 7.61E-04 |
| GO:0000122 | Negative regulation of transcription from RNA polymerase II promoter                         | 1.49E-05 | 1.05E-03 |
| GO:0001932 | Regulation of protein amino acid phosphorylation                                             | 1.63E-05 | 1.13E-03 |
| GO:0006796 | Phosphate metabolic process                                                                  | 2.08E-05 | 1.42E-03 |
| GO:0006793 | Phosphorus metabolic process                                                                 | 2.08E-05 | 1.42E-03 |
| GO:0007243 | Protein kinase cascade                                                                       | 2.12E-05 | 1.41E-03 |
| GO:0010647 | Positive regulation of cell communication                                                    | 2.36E-05 | 1.55E-03 |
| GO:0007242 | Intracellular signaling cascade                                                              | 2.58E-05 | 1.66E-03 |
| GO:0042127 | Regulation of cell proliferation                                                             | 2.70E-05 | 1.71E-03 |
| GO:0000165 | MAPKKK cascade                                                                               | 2.77E-05 | 1.73E-03 |
| GO:0051726 | Regulation of cell cycle                                                                     | 2.79E-05 | 1.71E-03 |

|            |                                                        |          |          |
|------------|--------------------------------------------------------|----------|----------|
| GO:0044093 | Positive regulation of molecular function              | 3.03E-05 | 1.82E-03 |
| GO:0010033 | Response to organic substance                          | 3.50E-05 | 2.08E-03 |
| GO:0033554 | Cellular response to stress                            | 3.70E-05 | 2.16E-03 |
| GO:0032268 | Regulation of cellular protein metabolic process       | 3.87E-05 | 2.22E-03 |
| GO:0050920 | Regulation of chemotaxis                               | 3.99E-05 | 2.26E-03 |
| GO:0008285 | Negative regulation of cell proliferation              | 4.36E-05 | 2.43E-03 |
| GO:0006916 | Anti-apoptosis                                         | 4.54E-05 | 2.49E-03 |
| GO:0000079 | Regulation of cyclin-dependent protein kinase activity | 4.63E-05 | 2.50E-03 |
| GO:0032774 | RNA biosynthetic process                               | 4.71E-05 | 2.51E-03 |
| GO:0006468 | Protein amino acid phosphorylation                     | 4.72E-05 | 2.48E-03 |
| GO:0043122 | Regulation of I-kappab kinase/NF-kappab cascade        | 4.93E-05 | 2.55E-03 |
| GO:0006402 | mRNA catabolic process                                 | 5.60E-05 | 2.86E-03 |
| GO:0016071 | mRNA metabolic process                                 | 5.90E-05 | 2.97E-03 |
| GO:0006366 | Transcription from RNA polymerase II promoter          | 6.79E-05 | 3.37E-03 |
| GO:0044265 | Cellular macromolecule catabolic process               | 6.84E-05 | 3.35E-03 |
| GO:0006351 | Transcription, DNA-dependent                           | 6.90E-05 | 3.34E-03 |
| GO:0043065 | Positive regulation of apoptosis                       | 7.22E-05 | 3.45E-03 |
| GO:0043068 | Positive regulation of programmed cell death           | 8.84E-05 | 4.17E-03 |
| GO:0010942 | Positive regulation of cell death                      | 1.01E-04 | 4.69E-03 |
| GO:0040017 | Positive regulation of locomotion                      | 1.08E-04 | 4.98E-03 |
| GO:0051341 | Regulation of oxidoreductase activity                  | 1.17E-04 | 5.32E-03 |
| GO:0050921 | Positive regulation of chemotaxis                      | 1.19E-04 | 5.31E-03 |
| GO:0000956 | Nuclear-transcribed mrna catabolic process             | 1.41E-04 | 6.25E-03 |
| GO:0045768 | Positive regulation of anti-apoptosis                  | 1.64E-04 | 7.16E-03 |
| GO:0032570 | Response to progesterone stimulus                      | 1.76E-04 | 7.58E-03 |
| GO:0032768 | Regulation of monooxygenase activity                   | 1.79E-04 | 7.62E-03 |
| GO:0043408 | Regulation of MAPKKK cascade                           | 1.90E-04 | 8.00E-03 |
| GO:0030335 | Positive regulation of cell migration                  | 2.39E-04 | 9.96E-03 |

---

\*  $p$ -values were calculated using Fischer's test.

\*\* FDR corrections were calculated using the Benjamini-Hochberg procedure [11].

## Supplementary Figure 1

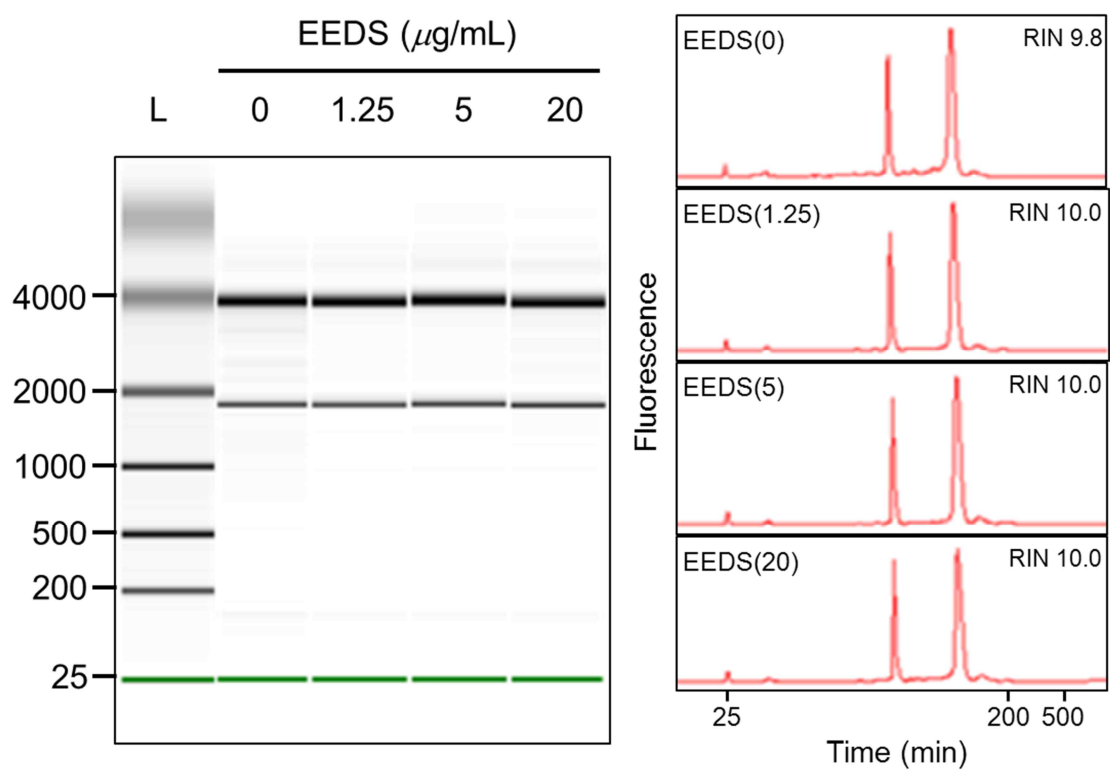

## Supplementary Figure 2

### Enriched pathways in Down-pattern

### Base excision repair

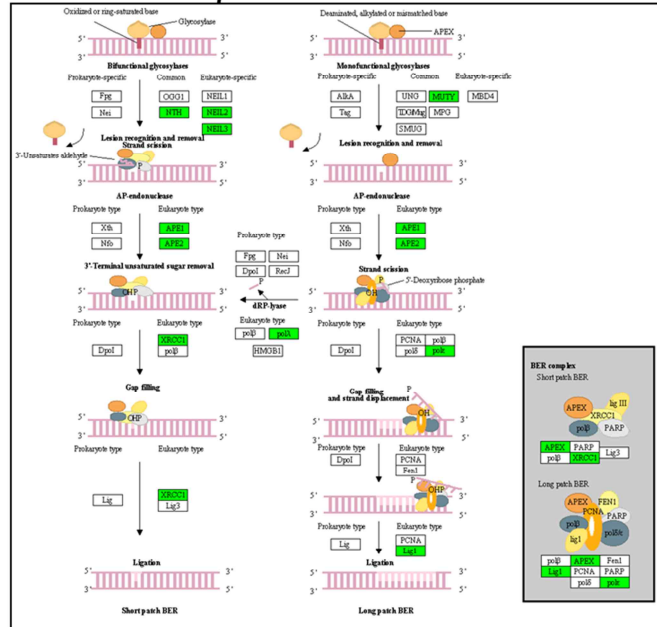

### Pentose phosphate pathway

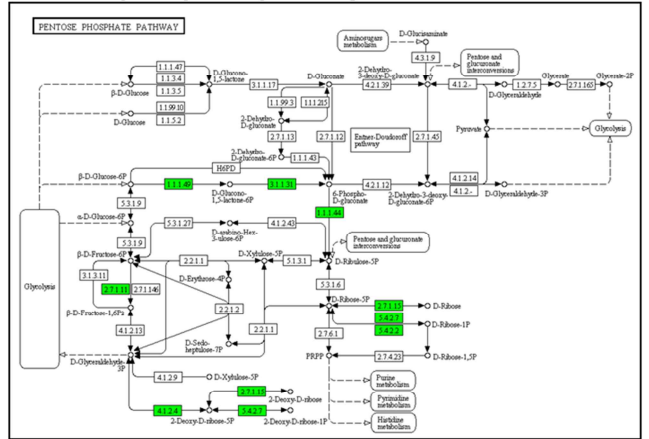

### **Sulfur relay system**

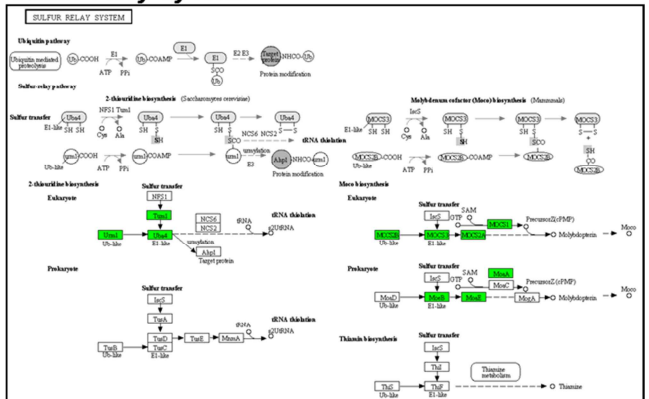

## Supplementary Figure 2 (continued)

### MAPK signaling pathway

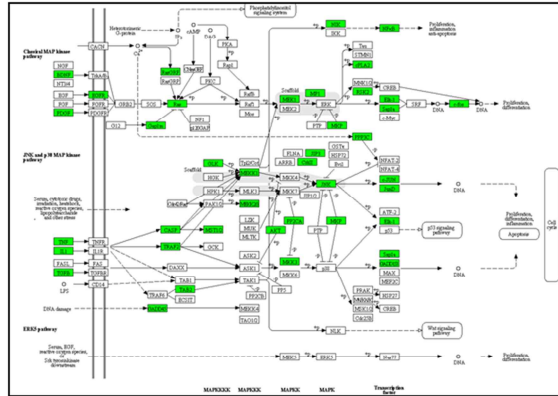

### Apoptosis

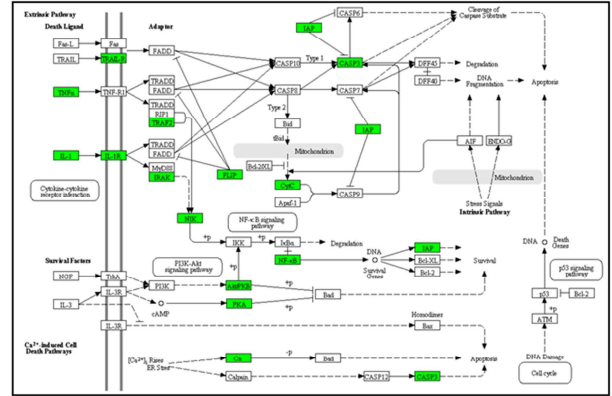

### p53 signaling pathway

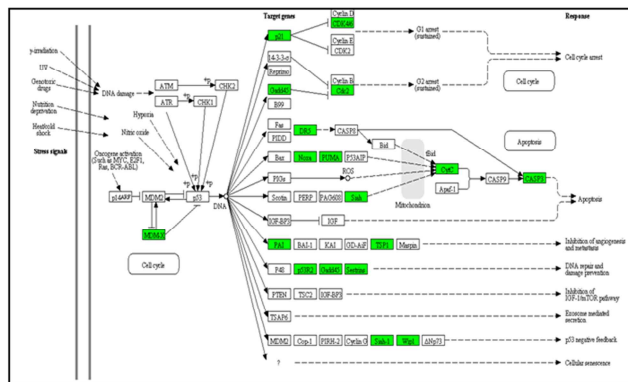

### TGF- $\beta$ signaling pathway

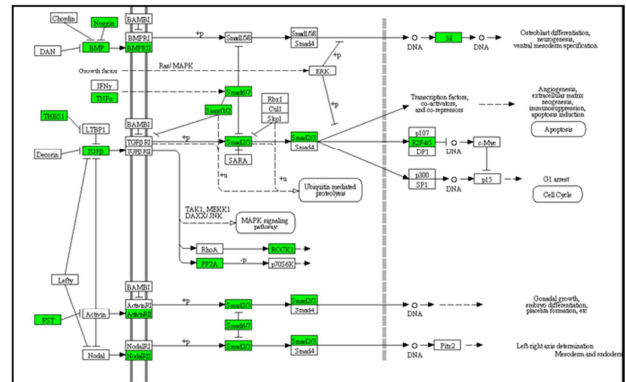





# Supplementary Figure 2 (continued)

## Enriched pathways in Up-pattern

### Osteoclast differentiation

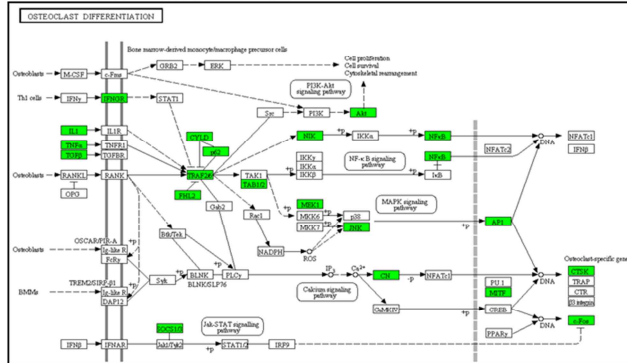

### NF-kappa B signaling pathway

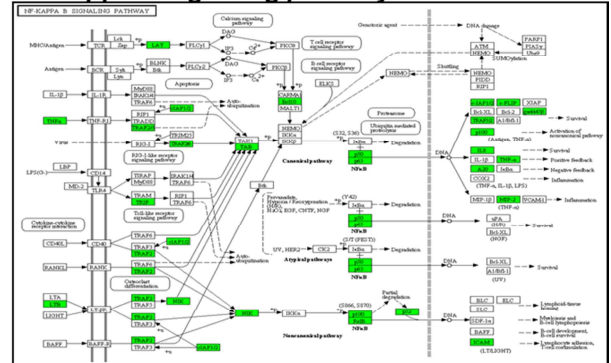

### Transcriptional misregulation in cancer

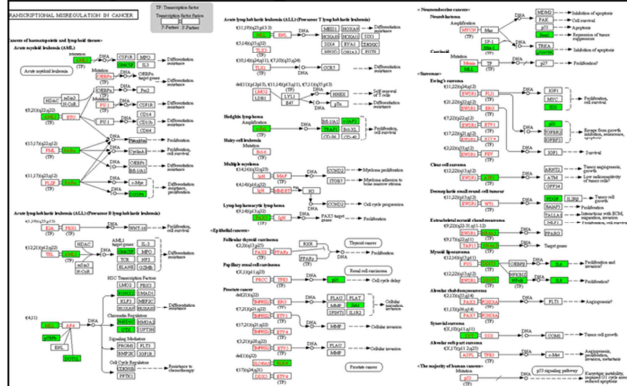

### Salmonella infection

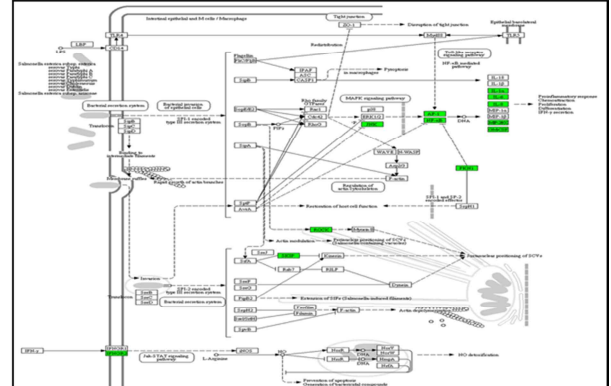

# Supplementary Figure 2 (continued)

## Enriched pathways in Up-pattern

### Legionellosis

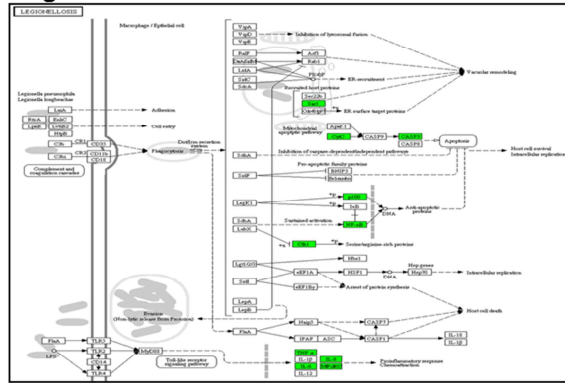

### GnRH signaling pathway

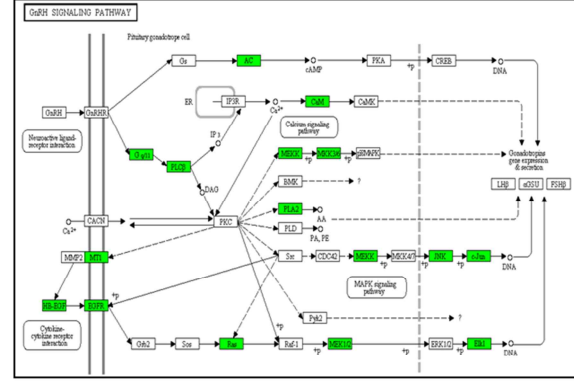

### ErbB signaling pathway

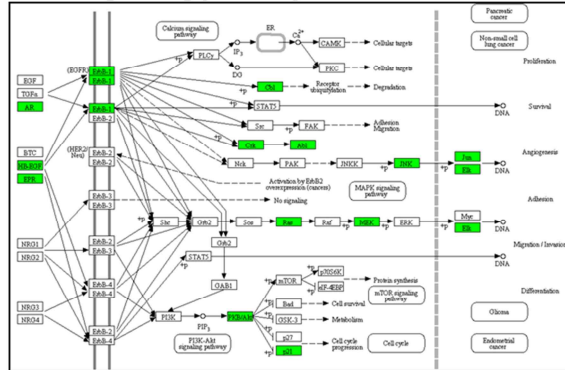

### Epithelial cell signaling in Helicobacter pylori infection

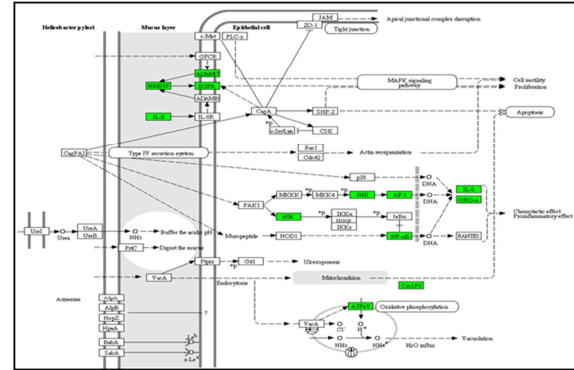

### Supplementary Figure 3

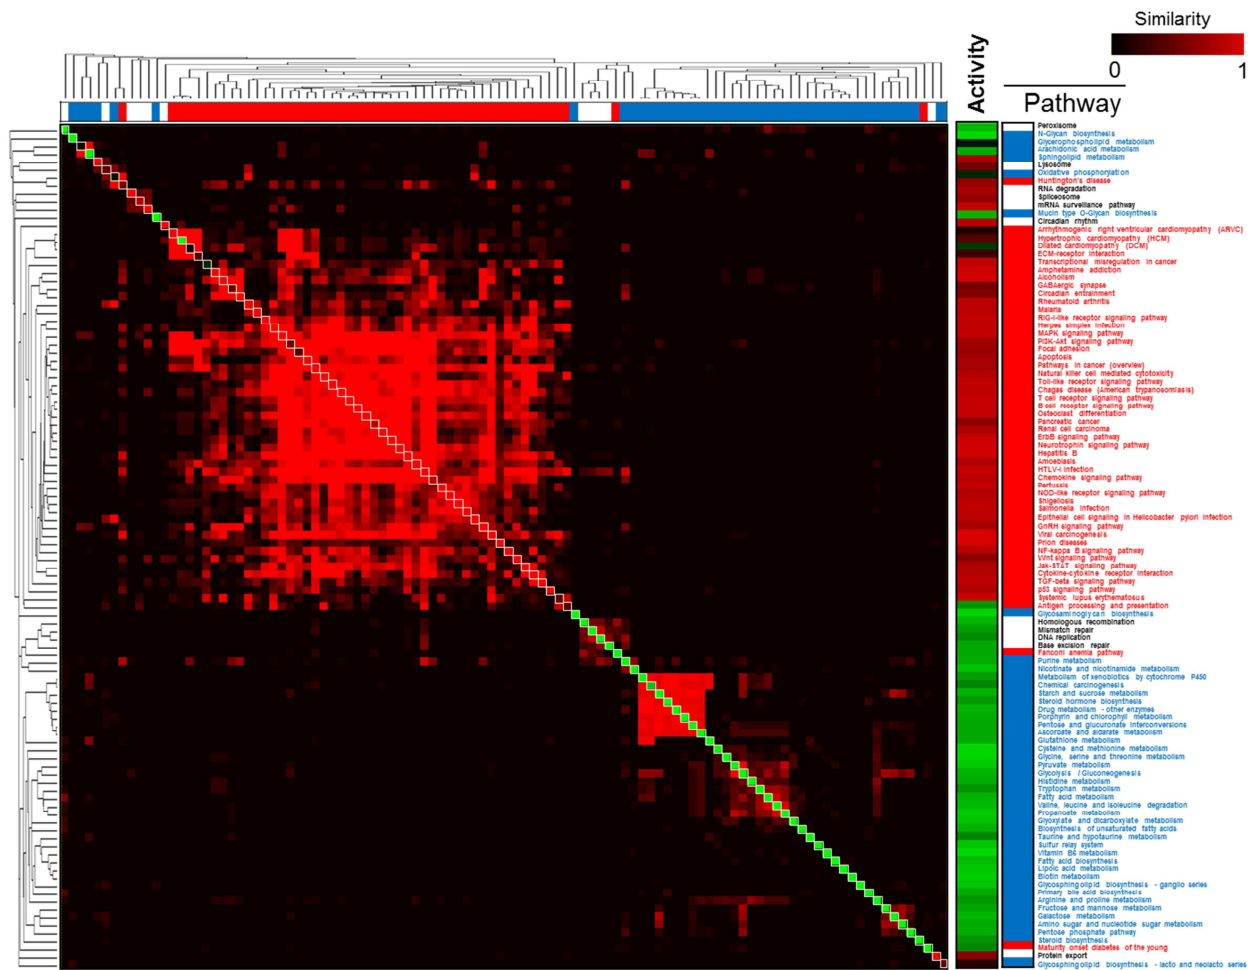

Supplement: f1 [file 584604.f1.pdf]
